# Supplementary material for: Decision for elective surgery - how well informed are patients and how easy is the decision for them?
Source: Research Square preprint supplement (doi:10.21203/rs.3.rs-4358526/v1), 2024-05-10
Supplement: Supplementary file 1 [file 0f28dce76e141e0faab50e32.docx]

**Appendix 2 inclusion criteria**

**Tonsillectomy / Tonsillotomy**

Time frame

Inpatient data: first quarter 2018 – second quarter 2020

Outpatient data: first quarter 2018 – first quarter 2020

**OPS Codes as inclusion criteria:**

- 5-281*
- 5-281.0 With dissection technique
- 5-281.2 Radical, transoral
- 5-281.3 Radical, by pharyngotomy
- 5-281.5 Partial, transoral, Incl: Tonsillotomy
- 5-281.x Other
- 5-281.y Unspecified
- 5-282*
- 5-282.0 With dissection technique
- 5-282.1 Tonsillectomy with adenotomy: Partial, transoral incl.: Tonsillotomy
- 5-282.x Other
- 5-282.y Unspecified
- All ages (minors < 18 Jahre, parents or legal guardians contacted)

**ICD Codes as exclusion criteria:**

Outpatient (assured) und inpatient (all diagnoses):

- - Peritonsillar abscess

Incl.: Abscess of tonsil,

Peritonsillar cellulitis,

Quinsy

Excl.: retropharyngeal abscess (J39.0),

tonsillitis:

NOS (J03.9)

acute (J03.-)

chronic (J35.0)

- C00-C14 Malignant neoplasms of lip, oral cavity and pharynx
- C76.- Malignant neoplasm of other and ill-defined sites
- C77.- Secondary and unspecified malignant neoplasm of lymph nodes
- C78.- Secondary malignant neoplasm of respiratory and digestive organs
- C79.- Secondary malignant neoplasm of other and unspecified sites
- C80.- Malignant neoplasm, without specification of site
- emergencies
- not insured via AOK < 31.12.2020
- Decedents

**Hysterectomy**

Time frame

Inpatient data: first quarter 2018 – second quarter 2020

**OPS Codes as inclusion criteria:**

- Age ≥ 18 years
- 5-682*
- 5-682.0 Suprazervikal
- 5-682.1 Supravaginal
- 5-682.2 Hemihysterectomy (bei Uterus bicornis)
- 5-682.x Other
- 5-682.y Unspecified
- 5-683*
- 5-683.0 Without salpingoovariectomy
- 5-683.1 With salpingoovariectomy, unilateral
- 5-683.2 With salpingoovariectomy, bilateral
- 5-683.5 With extensive retroperitoneal dissection, without salpingoovariectomy, Incl: For endometriosis
- 5-683.6 With extensive retroperitoneal dissection, with salpingoovariectomy, unilateral, Incl: For endometriosis
- 5-683.7 With extensive retroperitoneal dissection, with salpingoovariectomy, bilateral, Incl: For endometriosis
- 5-683.x Other
- 5-683.y Unspecified
- 5-685*
- 5-685.0 Without lymphadenectomy
- 5-685.00 Open surgery (abdominal)
- 5-685.01 Vaginal
- 5-685.02 Vaginal, laparoscopically assisted
- 5-685.03 Vaginal - open surgical transfer
- 5-685.0x Other
- 5-685.1 With pelvic lymphadenectomy
- 5-685.2 With paraaortic lymphadenectomy
- 5-685.3 With pelvic and paraaortic lymphadenectomy
- 5-685.4 Total mesometrial resection of the uterus [TMMR]

Info: This form of radical uterine extirpation includes exposure and protection of the lumbar splanchnic nerves, the superior hypogastric plexus, the hypogastric nerves, the inferior hypogastric plexus and the bilateral vascular-nerve supply of the urinary bladder

- 5-685.40 Without lymphadenectomy
- 5-685.41 With pelvic lymphadenectomy

Incl: Resection of additional lymph node stations, e.g. presacral lymph nodes, gluteal superior and gluteal inferior lymph nodes

- 5-685.42 With paraaortic lymphadenectomy
- 5-685.43 With pelvic and paraaortic lymphadenectomy

Incl: Resection of additional lymph node stations, e.g. presacral lymph nodes, gluteal superior and gluteal inferior lymph nodes

- 5-685.4x Other
- 5-685.x Other
- 5-685.y Unspecified

**ICD Codes as exclusion criteria:**

- C51-58 Malignant neoplasms of female genital organs
- C76.- Malignant neoplasm of other and ill-defined sites
- C77.- Secondary and unspecified malignant neoplasm of lymph nodes
- C78.- Secondary malignant neoplasm of respiratory and digestive organs
- C79.- Secondary malignant neoplasm of other and unspecified sites
- C80.- Malignant neoplasm, without specification of site
- Emergencies
- not insured via AOK < 31.12.2020
- Decedents
- Men

1. **Shoulder arthroscopy**

Time frame

Inpatient data: first quarter 2018 – second quarter 2020

Outpatient data: first quarter 2018 – first quarter 2020

**OPS Codes as inclusion criteria:**

- Age ≥ 18 years
- Outpatient and inpatient Procedures with OPS-Code 5-81* (shoulder arthroscopy)
- 5-810.*
- 5-810.0 Joint lavage with drainage, aseptic
- 5-810.00 Joint lavage with drainage, aseptic : Humeroglenoid joint
- 5-810.01 Joint lavage with drainage, aseptic : Acromioclavicular joint
- 5-810.02 Joint lavage with drainage, aseptic : Thoracoscapular joint (space)
- 5-810.03 Joint lavage with drainage, aseptic : Sternoclavicular joint
- 5-810.0x Joint lavage with drainage, aseptic : Other
- 5-810.1 Joint lavage with drainage, septic
- 5-810.10 Joint lavage with drainage, septic : Humeroglenoid joint
- 5-810.11 Joint lavage with drainage, septic : Acromioclavicular joint
- 5-810.12 Joint lavage with drainage, septic : Thoracoscapular joint (space)
- 5-810.13 Joint lavage with drainage, septic : Sternoclavicular joint
- 5-810.1x Joint lavage with drainage, septic : Other
- 5-810.2 Joint mobilization [arthrolysis]

Incl: debridement

- 5-810.20 Joint mobilization [arthrolysis] : Humeroglenoid joint
- 5-810.21 Joint mobilization [arthrolysis] : Acromioclavicular joint
- 5-810.22 Joint mobilization [arthrolysis] : Thoracoscapular joint (space)
- 5-810.23 Joint mobilization [arthrolysis] : Sternoclavicular joint
- 5-810.2x Joint mobilization [arthrolysis] : Other
- 5-810.3 Removal of osteosynthesis material

Incl: Removal of other implants

- 5-810.30 Removal of osteosynthesis material : Humeroglenoid joint
- 5-810.31 Removal of osteosynthesis material : Acromioclavicular joint
- 5-810.33 Removal of osteosynthesis material : Sternoclavicular joint
- 5-810.3x Removal of osteosynthesis material : Other
- 5-810.4 Removal of free joint bodies

Incl: Removal of a foreign body, removal of osteochondral fragments

- 5-810.40 Removal of free joint bodies : Humeroglenoid joint
- 5-810.41 Removal of free articular bodies : Acromioclavicular joint
- 5-810.43 Removal of free articular bodies : Sternoclavicular joint
- 5-810.4x Removal of free articular bodies : Other
- 5-810.5 Removal of periarticular calcifications
- 5-810.50 Removal of periarticular calcifications : Humeroglenoid joint
- 5-810.51 Removal of periarticular calcifications : Acromioclavicular joint
- 5-810.52 Removal of periarticular calcifications : Thoracoscapular joint (space)
- 5-810.53 Removal of periarticular calcifications : Sternoclavicular joint
- 5-810.5x Removal of periarticular calcifications : Other
- 5-810.6 Arthroscopically assisted treatment of a fracture; Info: These codes are additional codes and should be used to indicate arthroscopic support during fracture treatment. Fracture osteosynthesis performed must be coded separately (5-79)
- 5-810.60 Arthroscopically assisted treatment of a fracture : Humeroglenoid joint
- 5-810.61 Arthroscopically assisted treatment of fracture : Acromioclavicular joint
- 5-810.62 Arthroscopically assisted treatment of fracture : Thoracoscapular joint (space)
- 5-810.63 Arthroscopically assisted treatment of fracture : Sternoclavicular joint
- 5-810.6x Arthroscopically assisted treatment of a fracture : Other
- 5-810.7 Insertion of a drug carrier

Incl: Change

- 5-810.70 Insertion of a drug carrier : Humeroglenoid joint
- 5-810.71 Insertion of a drug carrier : Acromioclavicular joint
- 5-810.72 Insertion of a drug carrier : Thoracoscapular joint (space)
- 5-810.73 Insertion of a drug carrier : Sternoclavicular joint
- 5-810.7x Insertion of drug carrier : Other
- 5-810.8 Removal of a drug carrier
- 5-810.80 Removal of a drug carrier : Humeroglenoid joint
- 5-810.81 Removal of a drug carrier : Acromioclavicular joint
- 5-810.82 Removal of drug carrier : Thoracoscapular joint (space)
- 5-810.83 Removal of a drug carrier : Sternoclavicular joint
- 5-810.8x Removal of drug carrier : Other
- 5-810.9 Resection of ligament parts and/or ligament remnants
- 5-810.90 Resection of ligament parts and/or ligament remnants : Humeroglenoid joint
- 5-810.91 Resection of ligamentous components and/or remnants : Acromioclavicular joint
- 5-810.93 Resection of parts and/or remnants of ligaments : Sternoclavicular joint
- 5-810.9x Resection of ligamentous components and/or remnants : Other
- 5-810.x Other
- 5-810.x0 Other : Humeroglenoid joint
- 5-810.x1 Other : Acromioclavicular joint
- 5-810.x2 Other : Thoracoscapular joint (space)
- 5-810.x3 Other : Sternoclavicular joint
- 5-810.xx Other : Other
- 5-810.y Unspecified
- 5-811 Arthroscopic operation on the synovium

*Info: The localization is to be coded in the 6th digit after the list before code 5-810*

- 5-811.0x Resection of synovial plica : Other
- 5-811.1x Resection of a fat body (e.g. Hoffa fat body) : Other
- 5-811.2 Synovectomy, partial
- 5-811.20 Synovectomy, partial: Humeroglenoid joint
- 5-811.21 Synovectomy, partial: Acromioclavicular joint
- 5-811.23 Synovectomy, partial: Sternoclavicular joint
- 5-811.2x Synovectomy, partial: Other

5-811.3 Synovectomy, total

- 5-811.30 Synovectomy, total : Humeroglenoid joint
- 5-811.31 Synovectomy, total : Acromioclavicular joint
- 5-811.33 Synovectomy, total : Sternoclavicular joint
- 5-811.3x Synovectomy, total : Other
- 5-811.4 Electrothermal denervation of synovial and capsular tissue,

Incl: Arthroscopic patellar denervation

- 5-811.40 Electrothermal denervation of synovium and capsular tissue : Humeroglenoid joint
- 5-811.41 Electrothermal denervation of synovium and capsular tissue : Acromioclavicular joint
- 5-811.42 Electrothermal denervation of synovium and capsular tissue : Thoracoscapular joint (space)
- 5-811.43 Electrothermal denervation of synovium and capsular tissue : Sternoclavicular joint
- 5-811.4x Electrothermal denervation of synovium and capsular tissue : Other
- 5-811.x Other
- 5-811.x0 Other : Humeroglenoid joint
- 5-811.x1 Other : Acromioclavicular joint
- 5-811.x2 Other : Thoracoscapular joint (space)
- 5-811.x3 Other : Sternoclavicular joint
- 5-811.xx Other : Other
- 5-811.y Unspecified
- 5-812 Arthroscopic operation on articular cartilage and menisci

*Info: The localization is to be coded for the subcodes .0 to .4, .8 to .a and .x in the 6th digit after the list before code 5-810*

- 5-812.0 Excision of diseased tissue from articular cartilage
- 5-812.00 Excision of diseased tissue of articular cartilage : Humeroglenoid joint
- 5-812.01 Excision of diseased tissue of articular cartilage : Acromioclavicular joint
- 5-812.03 Excision of diseased tissue of articular cartilage : Sternoclavicular joint
- 5-812.0x Excision of diseased tissue of articular cartilage : Other
- 5-812.3 Refixation of an osteochondral fragment
- 5-812.30 Refixation of an osteochondral fragment : Humeroglenoid joint
- 5-812.31 Refixation of osteochondral fragment : Acromioclavicular joint
- 5-812.33 Refixation of osteochondral fragment : Sternoclavicular joint
- 5-812.3x Refixation of osteochondral fragment : Other
- 5-812.8 Removal of a cartilage graft

Incl: Removal of cartilage for cell and tissue culture

- 5-812.80 Harvesting of cartilage graft : Humeroglenoid joint
- 5-812.8x Harvesting of cartilage graft : Other
- 5-812.9 Cartilage transplantation
- 5-812.90 Cartilage grafting : Humeroglenoid joint
- 5-812.91 Cartilage transplantation : Acromioclavicular joint
- 5-812.93 Cartilage transplantation : Sternoclavicular joint
- 5-812.9x Cartilage transplantation : Other
- 5-812.a Implantation of tissue cultures produced in vitro; excl: Autogenous matrix-induced chondrocyte transplantation (5-812.h ff.)
- 5-812.a0 Implantation of tissue cultures prepared in vitro : Humeroglenoid joint
- 5-812.a1 Implantation of tissue cultures prepared in vitro : Acromioclavicular joint
- 5-812.a3 Implantation of tissue culture prepared in vitro : Sternoclavicular joint
- 5-812.ax Implantation of tissue culture prepared in vitro : Other
- 5-812.e Cartilage smoothing (chondroplasty)
- 5-812.e0 Cartilage smoothing (chondroplasty) : Humeroglenoid joint
- 5-812.e1 Cartilage smoothing (chondroplasty) : Acromioclavicular joint
- 5-812.e3 Cartilage smoothing (chondroplasty) : Sternoclavicular joint
- 5-812.ex Cartilage smoothing (chondroplasty) : Other
- 5-812.f Subchondral bone opening (e.g. after pridie, microfracturing, abrasion arthroplasty)
- 5-812.f0 Subchondral bone opening (e.g. after pridie, microfracture, abrasion arthroplasty) : Humeroglenoid joint
- 5-812.f1 Subchondral bone opening (e.g. after pridie, microfracture, abrasion arthroplasty) : Acromioclavicular joint
- 5-812.f3 Subchondral bone opening (e.g. after pridie, microfracture, abrasion arthroplasty) : Sternoclavicular joint
- 5-812.fx Subchondral bone opening (e.g. after pridie, microfracture, abrasion arthroplasty) : Other
- 5-812.g Subchondral bone opening with insertion of an acellular implant; Incl: Autogenous matrix-induced chondrogenesis
- 5-812.g0 Subchondral bone opening with insertion of an acellular implant : Humeroglenoid joint
- 5-812.g1 Subchondral bone opening with insertion of acellular implant : Acromioclavicular joint
- 5-812.g3 Subchondral bone opening with insertion of acellular implant : Sternoclavicular joint
- 5-812.gx Subchondral bone opening with insertion of acellular implant : Other
- 5-812.h Autogenous matrix-induced chondrocyte transplantation
- 5-812.h0 Autogenous matrix-induced chondrocyte transplantation : Humeroglenoid joint
- 5-812.h1 Autogenous matrix-induced chondrocyte transplantation : Acromioclavicular joint
- 5-812.h3 Autogenous matrix-induced chondrocyte transplantation : Sternoclavicular joint
- 5-812.hx Autogenous matrix-induced chondrocyte transplantation : Other
- 5-812.k Resection of one or more osteophytes
- 5-812.k0 Resection of one or more osteophytes : Humeroglenoid joint
- 5-812.k1 Resection of one or more osteophytes : Acromioclavicular joint
- 5-812.k2 Resection of one or more osteophytes : Thoracoscapular joint (space)
- 5-812.k3 Resection of one or more osteophytes : Sternoclavicular joint
- 5-812.kx Resection of one or more osteophytes : Other
- 5-812.m Subchondral bone opening with insertion of an acellular implant enriched with homologous whole blood or its components; excl: Autogenous matrix-induced chondrogenesis (5-812.g ff.)
- 5-812.m0 Subchondral bone opening with insertion of an acellular implant enriched with homologous whole blood or its components : Humeroglenoid joint
- 5-812.m1 Subchondral bone opening with insertion of an acellular implant enriched with homologous whole blood or its components : Acromioclavicular joint
- 5-812.m3 Subchondral bone opening with insertion of an acellular implant enriched with homologous whole blood or its components : Sternoclavicular joint
- 5-812.mx Subchondral bone opening with insertion of an acellular implant enriched with homologous whole blood or its components : Other
- 5-812.x Other
- 5-812.x0 Other : Humeroglenoid joint
- 5-812.x1 Other : Acromioclavicular joint
- 5-812.x2 Other : Thoracoscapular joint (space)
- 5-812.x3 Other : Sternoclavicular joint
- 5-812.xx Other : Other
- 5-812.y Unspecified
- 5-814 Arthroscopic refixation and plasty of the capsular ligament apparatus of the shoulder joint
- 5-814.0 Refixation of the glenoid labrum by suturing
- 5-814.1 Refixation of the glenoid labrum by other procedures; Incl: Bone anchor
- 5-814.2 Refixation of a bony labral tear (Bankart lesion)
- 5-814.3 Widening of the subacromial space; Incl: Bursectomy, resection of the coracoacromial ligament
- 5-814.4 Other reconstruction of the rotator cuff; Incl: Other reconstruction of the rotator cuff with debridement
- 5-814.5 Capsular retraction with fixation to the glenoid by suture; Incl: Fixation with bone anchor
- 5-814.6 Reconstruction of the rotator cuff by graft; Info: The type of graft must be coded separately (5-930 ff.)
- 5-814.7 Tenotomy of the long biceps tendon
- 5-814.8 Suture of the long biceps tendon
- 5-814.9 Tenodesis of the long biceps tendon
- 5-814.b Stabilization of the acromioclavicular joint by fixation procedure; Incl: Free tendon transplantation

*Info: The removal of tendon tissue for transplantation must be coded separately (5-852.f ff.)*

- 5-814.c Insertion of a spacer
- 5-814.d Shrinkage of the shoulder joint capsule using energy sources; Incl: Electrocautery
- 5-814.e Upper capsuloplasty; Incl: Fixation by bone anchor; Info: The type of graft must be coded separately (5-930 ff.)
- 5-814.x Other
- 5-814.y Unspecified

**ICD codes as inclusion criteria**

- Outpatient and inpatient: ICD-10-diagnoses M75.*-diagnoses (Shoulder lesions as main or secondary diagnosis/assured diagnosis)
- M75.* Shoulder lesions

Excl.: shoulder-hand syndrome (M89.0)

- M75.0 Adhesive capsulitis of shoulder

Incl.: Frozen shoulder, Periarthropathia humeroscapularis

- M75.1 Rotator cuff syndrome

Incl.: Rotator cuff or supraspinatus tear or rupture (complete)(incomplete), not specified as traumatic, Supraspinatus syndrome

- M75.2 Bicipital tendinitis
- M75.3 Calcific tendinitis of shoulder

Incl.: Calcified bursa of shoulder

- M75.4 Impingement-Syndrome of shoulder
- M75.5 Bursitis of shoulder
- M75.6 Tear of labrum of degenerative shoulder joint
- M75.8 Other shoulder lesions
- M75.9 Shoulder lesion, unspecified

**Exclusion criteria:**

- Outpatient and inpatient diagnoses with ICD-Code:

S40-S49 Injuries to the shoulder and upper arm

- Emergencies
- not insured via AOK < 31.12.2020
- Minors < 18 years
- Decedents
