# Supplementary material for: Decision for elective surgery - how well informed are patients and how easy is the decision for them?
Source: Research Square preprint supplement (doi:10.21203/rs.3.rs-4358526/v1), 2024-05-10
Supplement: Supplementary file 2 [file 2294b8a25fbd7016032fa67a.docx]

## Appendix 4 individual results

| Item | Results (%; n/N or Median (IQR)) | | | |
| --- | --- | --- | --- | --- |
|  | Overall | HE | TT/TE | SA |
| What were the reasons that led to the recommendation for surgical removal of the uterus/tonsillectomy/shoulder arthroscopy? (Multiple answers are possible.) |  | Myoma:  41.71%; 244/585  Heavy bleeding:  36.24%; 212/585  Uterine prolapse:  35.38%; 207/585  Endometriosis:  7.35%; 43/585  Tumours (cancer):  1.88%; 11/585  I do not know:  1.20%; 7/585  Other:  25.64%; 150/585  No (valid) response:  1.37%; 8/585 | Enlarged tonsils: 59.62%; 158/265  Recurrent tonsillitis:  47.55%; 126/265  Malignant tumours:  1.13%; 3/265  I do not know: 3.40%; 9/265  Other:  32.83%; 87/265  No (valid) response:  0.75%; 2/265 | Tears in the rotator cuff:  32.95%; 258/783  Osteoarthritis:  32.44%; 254/783  Bursitis:  28.86%; 226/783  Calcified shoulder:  23.37%; 183/783  Impingement syndrome: 15.84%; 124/783  Shoulder stiffness:  14.56%; 114/783  SLAP lesions:  9.83%; 77/783  I do not know: 4.85%; 38/783  Other:  28.35%; 222/783  No (valid) response:  2.94%; 23/783 |
| When was the surgery performed?  2018  2019  2020  No (valid) response | 31.72%; 518/1633  37.84%; 618/1633  22.60%; 369/1633  7.84%; 128/1633 | 31.45%; 184/585  40.00%; 234/585  21.54%; 126/585  7.01%; 41/585 | 35.09%; 93/265  35.09%; 93/265  20.38%; 54/265  9.43%; 25/265 | 30.78%; 241/783  37.16%; 291/783  24.14%; 189/783  7.92%; 62/783 |
| Who was the first to recommend your surgical removal of the uterus/tonsillectomy/shoulder arthroscopy?  *Please indicate only one answer.*  A physician in a medical practice  A physician in a hospital (not referring to the consultation before surgery)  Other  No (valid) response | 71.1%; 1161/1633  14.39%; 235/1633  8.94%; 146/1633  5.57%; 91/1633 | 69.74%; 408/585  13.50%; 79/585  10.60%; 62/585  6.15%; 36/585 | 73.21%; 194/265  9.43%; 25/265  10.94%; 29/265  6.42%; 17/265 | 71.39%; 559/783  16.73%; 131/783  7.02%; 55/783  4.85%; 38/783 |
| How did your health status changed post-surgery?  *Please indicate the respective response.*  Strong improvement  Light improvement  No change  Light impairment  Strong impairment  No (valid) response | 61.3%; 1001/1633  19.78%; 323/1633  7.41%; 121/1633  3.67%; 60/1633  4.65%; 76/1633  3.18%; 52/1633 | 59.66%; 349/585  15.73%; 92/575  10.60%; 62/585  4.79%; 28/585  5.30%; 31/585  3.93%; 23/585 | 75.85%; 201/265  12.45%; 33/265  4.91%; 13/265  1.89%; 5/265  1.13%; 3/265  3.77%; 10/265 | 57.60%; 451/783  25.29%; 198/783  5.87%; 46/783  3.45%; 27/783  5.36%; 42/783  2.43%; 19/783 |
| Please think back to the time when you made the decision to have the surgery. How did you feel about the decision? *Please indicate the respective response*.  Very easy  Easy  Medium  Hard  Very hard  No (valid) response | 21%; 343/1633  32.52%; 531/1633  22.11%; 361/1633  15.55%; 254/1633  6.43%; 105/1633  2.39%; 39/1633 | 22.05%; 129/585  27.35%; 160/585  20.34%; 119/585  17.09%; 100/585  9.74%; 57/585  3.42%; 20/585 | 14.34%; 38/265  34.34%; 91/265  25.66%; 68/265  16.23%; 43/265  6.42%; 17/265  3.02%; 8/265 | 22.48%; 176/783  35.76%; 280/783  22.22%; 174/783  14.18%; 111/783  3.96%; 31/783  1.40%; 11/783 |
| How urgent did you feel the decision was? *Please indicate the respective response*.  Not at all urgent  Less urgent  Medium  Urgent  Very urgent  No (valid) response | 1.53%; 25/1633  2.08%; 34/1633  11.21%; 183/1633  42.31%; 691/1633  40.60%; 663/1633  2.27%; 37/1633 | 2.74%; 16/585  3.25%; 19/585  11.11%; 65/585  44.62%; 261/585  35.21%; 206/585  3.08%; 18/585 | 2.64%; 7/265  3.40%; 9/265  15.47%; 41/265  40.38%; 107/265  35.09%; 93/265  3.02%; 8/265 | 0.26%; 2/783  0.77%; 6/783  9.83%; 77/783  41.25%; 323/783  46.49%; 364/783  1.40%; 11/783 |
| Please think back to the conversation with your physician who first recommended an uterine removal to you/a tonsillectomy/a shoulder arthroscopy. *Please indicate the respective response*.  How informed did you feel about …  … your condition?  Very good  Good  Medium  Bad  Very bad  No (valid) response  … benefits of the surgery?  Very good  Good  Medium  Bad  Very bad  No (valid) response  … risks and side effects of the surgery?  Very good  Good  Medium  Bad  Very bad  No (valid) response  … treatment alternatives?  Very good  Good  Medium  Bad  Very bad  No (valid) response | 32.82%; 536/1633  43.6%; 712/1633  11.27%; 184/1633  5.02%; 82/1633  2.63%; 43/1633  4.65% 76/1633  31.84%; 520/1633  46.72%; 763/1633  11.64%; 190/1633  2.51%; 41/1633  1.59%; 26/1633  5.7%; 93/1633  27.07%; 442/1633  37.54%; 613/1633  18.68%; 305/1633  6%; 98/1633  3.86%; 63/1633  6.86%; 112/1633  26.15%; 427/1633  40.11%; 655/1633  14.21%; 232/1633  6.98%; 114/1633  3.98%; 65/1633  8.57%; 140/1633 | 32.31%; 189/585  39.49%; 231/585  12.65%; 74/585  5.81%; 34/585  2.91%; 17/585  6.84%; 40/585  30.77%; 180/585  43.59%; 255/585  13.16%; 77/585  2.74%; 16/585  1.71%; 10/585  8.03%; 47/585  27.35%; 160/585  33.33%; 195/585  17.44%; 102/585  7.18%; 42/585  5.98%; 35/585  8.72%; 51/585  27.69%; 162/585  35.38%; 207/585  12.82%; 75/585  7.86%; 46/585  4.27%; 25/585  11.97%; 70/585 | 32.45%; 86/265  44.15%; 117/265  10.94%; 29/265  6.04%; 16/265  3.40%; 9/265  3.02%; 8/265  37.74%; 100/265  47.17%; 125/265  9.81%; 26/265  1.51%; 4/265  0.38%; 1/265  3.40%; 9/265  30.57%; 81/265  36.23%; 96/265  21.89%; 58/265  5.28%; 14/265  2.26%; 6/265  3.77%; 10/265  21.89%; 58/265  40.75%; 108/265  18.49%; 49/265  8.30%; 22/265  4.53%; 12/265  6.04%; 16/265 | 33.33%; 261/783  46.49%; 364/783  10.34%; 81/783  4.09%; 32/783  2.17%; 17/783  3.58%; 28/783  30.65%; 240/783  48.91%; 383/783  11.11%; 87/783  2.68%; 21/783  1.92%; 15/783  4.73%; 37/783  25.67%; 201/783  41.12%; 322/783  18.52%; 145/783  5.36%; 42/783  2.81%; 22/783  6.51%; 51/783  26.44%; 207/783  43.42%; 340/783  13.79%; 108/783  5.87%; 46/783  3.58%; 28/783  6.90%; 54/783 |
| Please think back to the conversation with your physician who first recommended an uterine removal/a tonsillectomy/a shoulder arthroscopy to you. *Please indicate the respective response.*  How understandable was the information you received?  Very good  Good  Medium  Bad  Very bad  No (valid) answer  Overall, how informed did you feel?  Very good  Good  Medium  Bad  Very bad  No (valid) answer  How comprehensible was the recommendation for surgery for you?  Very good  Good  Medium  Bad  Very bad  No (valid) answer | 37.72%; 616/1633  45.68%; 756/1633  9.61%; 157/1633  2.82%; 46/1633  0.73%; 12/1633  3.43%; 56/1633  37.17%; 607/1633  45.56%; 744/1633  10.35%; 169/1633  2.76%; 45/1633  1.47%; 24/1633  2.69; 44/1633  36.86%; 602/1633  46.79%; 764/1633  9.74%; 159/1633  2.33%; 38/1633  1.16%; 19/1633  3.12%; 51/1633 | 36.24%; 212/585  44.96%; 263/585  8.55%; 50/585  4.10%; 24/585  1.20%; 7/585  4.96%; 29/585  37.09%; 217/585  41.88%; 245/585  11.11%; 65/585  3.93%; 23/585  2.22%; 12/585  3.76%; 22/585  37.78%; 221/585  42.39%; 248/585  10.77%; 63/585  2.91%; 17/585  1.71%; 10/585  4.44%; 26/585 | 41.51%; 110/265  45.28%; 120/265  9.81%; 26/265  1.13%; 3/265  0.38%; 1/265  1.89%; 5/265  38.11%; 101/265  44.91%; 119/265  10.94%; 29/265  2.64%; 7/265  0.38%; 1/265  3.02%; 8/265  48.68%; 129/265  41.13%; 109/265  5.66%; 15/265  1.51%; 4/265  1.13%; 3/265  1.89%; 5/265 | 37.55%; 294/783  46.36%; 363/783  10.34%; 81/783  2.43%; 19/783  0.51%; 4/783  2.81%; 22/783  36.91%; 289/783  48.53%; 380/783  9.58%; 75/783  1.92%; 15/783  1.28%; 10/783  1.79%; 14/783  32.18%; 252/783  51.98%; 407/783  10.34%; 81/783  2.17%; 17/783  0.77%; 6/783  2.55%; 20/783 |
| Would you have liked more information before the surgery?  *Multiple answers possible.*  No, I would not have liked any additional information  Yes, I would have liked more information about the disadvantages of surgery  Yes, I would have liked more information about the treatment options  Yes, I would have liked more information about the advantages of the surgery  Yes, I would have liked more information about the disease  Other  No (valid) response | 60.81%; 993/1633  18.49%; 302/1633  17.02%; 278/1633  14.08%; 230/1633  12.31%; 201/1633  3.74%; 61/1633  4.04%; 66/1633 | 60.34%; 353/585  21.88%; 128/585  16.07%; 94/585  15.04%; 88/585  12.48%; 73/585  2.74%; 16/585  4.62%; 27/585 | 61.89%; 164/265  19.62%; 52/265  18.11%; 48/265  17.74%; 47/265  10.94%; 29/265  6.04%; 16/265  2.64%; 7/265 | 60.79%; 476/783  15.58%; 122/783  17.37%; 136/783  12.13%; 95/783  12.64%; 99/783  3.70%; 29/783  4.09%; 32/783 |
| Did you obtain information about the diagnosis or treatment elsewhere before the operation? *Multiple answers possible.*  No  Yes, I researched on the Internet  Yes, I spoke to relatives/friends  Yes, I have consulted medical professionals (e.g. doctor, physiotherapist)  Yes, I have asked the health insurance company  Other  No (valid) response | 41.46%; 677/1633  30.37%; 496/1633  27.80%; 454/1633  25.66%; 419/1633  1.29%; 21/1633  4.78%; 677/1633  3.25%; 53/1633 | 38.12%; 223/585  35.04%; 205/585  38.29%; 224/585  20.85%; 122/585  2.05%; 12/585  3.25%; 19/585  4.44%; 26/585 | 41.13%; 109/265  33.58%; 89/265  25.28%; 67/265  20.38%; 54/265  0.75%; 2/265  7.55%; 20/265  2.64%; 7/265 | 44.06%; 345/783  25.80%; 202/783  20.82%; 163/783  31.03%; 243/783  0.89%, 7/783  4.98%; 39/783  2.55%; 20/783 |
| If you obtained further information, which source was most important to you?  Personal experience  Medical professionals  Media  Affected persons/acquaintances  No (valid) response | 0.31%; 5/1633  11.21%; 183/1633  6.67%; 109/1633  6.98%; 114/1633  33.68%; 550/1633 | 0.60%; 2/585  19.94%; 67/585  11.31%; 38/585  16.37%; 55/585  61.31%; 206/585 | 1.36%; 2/265  21.77%; 32/265  23.13%; 34/265  24.49%; 36/265  41.50%; 61/265 | 0.13%; 1/783  10.73%; 84/783  4.73%; 37/783  3.07%; 23/783  36.14%; 283/783 |
| Please now only consider about the source that was most important to you, beyond the conversation with your physician who first recommended surgery to you.  *Please indicate the respective response.*  How was it for you to receive additional information from the other source?  Very easy  Easy  Medium  Hard  Very hard  No (valid) response  How comprehensible were the additional information from the other source?  Very easy  Easy  Medium  Hard  Very hard  No (valid) response | 16.87%; 152/901  43.62%; 393/901  25.42%; 229/901  4.88%; 44/901  1.66%; 15/901  7.55%; 68/901  16.87%; 152/901  41.84%; 377/901  27.41%; 247/901  3.33%; 30/901  1.00%; 9/901  9.54%; 86/901 | 16.67%; 56/336  40.48%; 136/336  25.89%; 87/336  5.65%; 19/336  1.79%; 6/336  9.52%; 32/336  17.86%; 60/336  40.18%; 135/336  27.38%; 92/336  2.68%; 9/336  1.19%; 4/336  10.71%; 36/336 | 23.13%; 34/147  44.22%; 65/147  25.17%; 37/147  3.40%; 5/147  1.36%; 2/147  2.72%; 4/147  25.85%; 38/147  44.90%; 66/147  24.49%; 36/147  1.36%; 2/147  0.68%; 1/147  2.72%; 4/147 | 14.83%; 62/418  45.69%; 191/418  25.36%; 106/418  4.78%; 20/418  1.67%; 7/418  7.66%; 32/418  12.92%; 54/418  42.11%; 176/418  28.47%; 119/418  4.55%; 19/418  0.96%; 4/418  11.00%; 46/418 |
| How reliable did you find the additional information from the other source? Please consider only the source that was most important to you. *Please indicate the respective response.*  Very reliable  Rather reliable  Medium  Less reliable  Not reliable  No (valid) response | 30.97%; 279/901  38.73%; 349/901  21.31%; 192/901  2.33%; 21/901  0.78%; 7/901  5.88%; 53/901 | 33.63%; 113/336  36.01%; 121/336  20.54%; 69/336  1.49%; 5/336  0.89%; 3/336  7.44%; 25/336 | 36.73%; 54/147  36.73%; 54/147  21.09%; 31/147  3.40%; 5/147  0.68%; 1/147  1.36%; 2/147 | 26.79%; 112/418  41.63%; 174/418  22.01%; 92/418  2.63%; 11/418  0.72%; 3/418  6.22%; 26/418 |
| To what extent did the additional information from the other source contribute to your decision? Please consider only the source that was most important to you. *Please indicate the respective response.*  Very strong  Somewhat  Medium  Light  Not at all  No (valid) response | 27.97%; 252/901  25.19%; 227/901  17.87%; 161/901  13.54%; 122/901  9.54%; 86/901  5.88%; 53/901 | 28.87%; 97/336  21.13%; 71/336  18.75%, 63/336  14.58%; 49/336  9.52%; 32/336  7.14%; 24/336 | 28.57%; 42/147  31.97%; 47/147  22.45%; 33/147  10.88%; 16/147  4.76%; 7/147  1.36%; 2/147 | 27.03%; 113/418  26.08%; 109/418  15.55%; 65/418  13.64%; 57/418  11.24%; 47/418  6.46%; 27/418 |
| To what extent did the additional information from the other source unsettle you? Please consider only the source that was most important to you. *Please indicate the respective response.*  Not at all  Lightly  Medium  Somewhat  Very strong  No (valid) response | 40.73%; 367/901  24.86%; 224/901  12.43%; 112/901  13.65%; 123/901  2.55%; 23/901  5.77%; 52/901 | 40.77%; 137/336  20.54%; 69/336  12.50%; 42/336  15.48%; 52/336  3.57%; 12/336  7.14%; 24/336 | 34.01%; 50/147  31.29%; 46/147  14.97%; 22/147  16.33%; 24/147  2.04%; 3/147  1.36%; 2/147 | 43.06%; 180/418  26.08%; 109/418  11.48%; 48/418  11.24%; 47/418  1.91%; 8/418  6.22%; 26/418 |
| Decision conflict scale  Median  Min  Max  25. Percentile  75. Percentile  Based on x responses | 15  0  100  5  30  1481 | 15  0  100  3.33  31.67  529 | 15  0  86.67  6.67  30  257 | 15  0  100  5  30  695 |
| Decision regret scale  Median  Min  Max  25. Percentile  75. Percentile  Based on x responses | 5  0  100  0  20  1496 | 5  0  100  0  25  530 | 5  0  100  0  20  253 | 5  0  100  0  20  713 |
| Did you obtain second opinion before the surgery?  Yes  No  No (valid) response | 29.15%; 476/1633  66.99%; 1094/1633  3.86%; 63/1633 | 28.03%; 164/585  67.86%; 397/585  4.10%; 24/585 | 32.83%; 87/265  63.02%; 167/265  4.15%; 11/265 | 28.74%; 225/783  67.69%; 530/783  3.58%; 28/783 |
| If you obtained a second opinion, from whom did you obtain it? *Please indicate only one answer.*  A physician in a medical practice  A physician in a hospital (not referring to the consultation before surgery)  Health insurance company  Other  No (valid) response | 52.31%; 249/476  32.14%; 153/476  1.05%; 5/476  4.84%; 23/476  9.66%; 46/476 | 40.24%; 66/164  46.34%; 76/164  1.83%; 3/164  4.27%; 7/164  7.32%; 12/164 | 57.47%; 50/87  14.94%; 13/87  0.00%; 0/87  9.20%; 8/87  18.39%; 16/87 | 59.11%; 133/225  28.44%; 64/225  0.89%; 2/225  3.56%; 8/225  8.00%; 18/225 |
| Did the physician who gave you a second opinion also perform the surgery? Please only refer to the scenario where you actively obtained a second opinion from this physician and exclude the consultation before surgery.  Yes  No  No (valid) response | 48.74%; 232/476  49.79%; 237/476  1.47%; 7/476 | 48.17%; 79/164  50.00%; 82/164  1.83%; 3/164 | 39.08%; 34/87  60.92%; 53/87  0.00%; 0/87 | 52.89%; 119/225  45.33%; 102/225  1.78%; 4/225 |
| Did the last obtained second opinion from a physician confirm the first opinion?  Yes  Partially  No  No (valid) response | 73.74%; 351/476  15.97%; 76/476  9.66%; 46/476  0.63%; 3/476 | 78.66%; 129/164  15.24%; 25/164  5.49%; 9/164  0.61%; 1/164 | 71.26%; 62/87  18.39%; 16/87  10.34%; 9/87  0.00%; 0/87 | 71.11%; 160/225  15.56%; 35/225  12.44%; 28/225  0.89%; 2/225 |
| To what extent did the last obtained second opinion from a physician contributed to your decision?  After obtaining the second opinion, I was sure which treatment to choose  After obtaining the second opinion, I was still uncertain which treatment to choose  No (valid) response | 89.08%; 424/476  9.45%; 45/476  1.47%; 7/476 | 87.80%; 144/164  10.37%; 17/164  1.83%; 3/164 | 90.80%; 79/87  9.20%; 8/87  0.00%; 0/87 | 89.33%; 201/225  8.89%; 20/225  1.78%; 4/225 |
| Did you ask for a third opinion thereafter?  Yes  No  No (valid) response | 7.35%; 35/476  91.81%; 437/476  0.84%; 4/476 | 6.10%; 10/164  92.68%; 152/164  1.22%; 2/164 | 11.49%; 10/87  87.36%; 76/87  1.15%; 1/87 | 6.67%; 15/225  92.89%; 209/225  0.44%; 1/225 |
| Besides a personal physician-patient contact, there are other options to obtain a second opinion. For example, it is possible to send the findings documentation to the second opinion specialist and receive a statement by phone call or in a written form. We would like to know in the following, which option would be suitable for you to obtain a second opinion for surgical removal of the uterus/tonsillectomy/shoulder. *Please indicate one response respectively.*  Personal consultation at the site  Worth considering  Rather worth considering  Neutral  Rather not worth considering  Not worth considering  No (valid) response  Consultation by phone call  Worth considering  Rather worth considering  Neutral  Rather not worth considering  Not worth considering  No (valid) response  Written consultation by email/ mail  Worth considering  Rather worth considering  Neutral  Rather not worth considering  Not worth considering  No (valid) response | 40.97%; 669/1633  8.21%; 134/1633  8.76%; 143/1633  3.55%; 58/1633  25.78%; 421/1633  12.74%; 208/1633  4.23%; 69/1633  3.06%; 50/1633  7.84%; 128/1633  8.27%; 135/1633  52.79%; 862/1633  23.82%; 389/1633  3.06%; 50/1633  2.63%; 43/1633  7.84%; 128/1633  8.14%; 133/1633  54.44%; 889/1633  23.88%; 390/1633 | 36.41%; 213/585  7.69%; 45/585  7.86%; 46/585  3.42%; 20/585  30.09%; 176/585  14.53%; 85/585  4.10%; 24/585  2.22%; 13/585  5.81%; 34/585  7.18%; 42/585  55.04%; 322/585  25.64%; 150/585  2.74%; 16/585  2.39%; 14/585  6.32%; 37/585  5.98%; 35/585  56.58%; 331/585  25.98%; 152/585 | 46.42%; 123/265  9.43%; 25/265  12.08%; 32/265  2.64%; 7/265  19.25%; 51/265  10.19%; 27/265  6.04%; 16/265  7.17%; 19/265  16.60%; 44/265  9.06%; 24/265  47.17%; 125/265  13.96%; 37/265  4.53%; 12/265  4.91%; 13/265  15.09%; 40/265  10.19%; 27/265  50.94%; 135/265  14.34%; 38/265 | 42.53%; 96/783  8.17%; 64/783  8.30%; 65/783  3.96%; 31/783  24.78%; 194/783  12.26%; 96/783  3.70%; 29/783  2.30%; 18/783  6.39%; 50/783  8.81%; 69/783  53.00%; 415/783  25.80%; 202/783  2.81%; 22/783  2.04%; 16/783  6.51%; 51/783  9.07%; 71/783  54.02%; 423/783  25.54%; 200/783 |
| If you did **not** wish to obtain a second opinion, what were the reasons for? *Please indicate the respective response. If you obtained a second opinion 🡪 go ahead with question XX*  I did not wish to obtain a second opinion because I…  … had the fullest trust in my physician and rely on his decision.  Completely applicable  Rather applicable  Rather not applicable  Not at all applicable  No (valid) response  … perceived the operation as the last possibility.  Completely applicable  Rather applicable  Rather not applicable  Not at all applicable  No (valid) response  … had sufficient information to base my decision upon them.  Completely applicable  Rather applicable  Rather not applicable  Not at all applicable  No (valid) response  … wanted the operation regardless of a second opinion.  Completely applicable  Rather applicable  Rather not applicable  Not at all applicable  No (valid) response  … thought that too many opinions merely lead to feelings of uncertainty.  Completely applicable  Rather applicable  Rather not applicable  Not at all applicable  No (valid) response  … found that the effort to obtain a second opinion is too high.  Completely applicable  Rather applicable  Rather not applicable  Not at all applicable  No (valid) response  … was afraid that the relationship to my physician could worsen through obtaining a second opinion.  Completely applicable  Rather applicable  Rather not applicable  Not at all applicable  No (valid) response  Other reasons against the consultation of a second opinion  Yes  No (valid) response | 63.53%; 695/1094  21.57%; 236/1094  3.20%; 35/1094  2.10%; 23/1094  9.60%; 105/1094  52.29%; 572/1094  23.58%; 258/1094  6.58%; 72/1094  5.48%; 60/1094  12.07%; 132/1094  49.82%; 545/1094  25.41%; 278/1094  6.49%; 71/1094  5.30%; 58/1094  12.98%; 142/1094  42.32%; 463/1094  21.94%; 240/1094  8.32%; 91/1094  12.80%; 140/1094  14.63%; 160/1094  14.72%; 161/1094  19.10%; 209/1094  16.73%; 183/1094  35.19%; 385/1094  14.26%; 156/1094  12.98%; 142/1094  15.90%; 174/1094  19.20%; 210/1094  36.38%; 398/1094  15.54%; 170/1094  3.93%; 43/1094  5.03%; 55/1094  13.71%; 150/1094  63.25%; 692/1094  14.08%; 154/1094  14.54%; 159/1094  85.47%; 935/1094 | 60.20%; 239/397  20.65%; 82/397  3.27%; 13/397  3.27%; 13/397  12.59%; 50/397  51.64%; 205/397  22.42%; 89/397  5.04%; 20/397  7.30%; 29/397  13.60%; 54/397  45.84%; 182/397  23.93%; 95/397  6.55%; 26/397  7.05%; 28/397  16.62%; 66/397  42.32%; 168/397  19.90%; 79/397  7.05%; 28/397  14.36%; 57/397  16.37%; 65/397  11.84%; 47/397  16.88%; 67/397  16.37%; 65/397  37.28%; 148/397  17.63%; 70/397  10.33%; 41/397  13.85%; 55/397  19.14%; 76/397  37.28%; 148/397  19.40%; 77/397  2.52%; 10/397  5.04%; 20/397  13.35%; 53/397  62.47%; 248/397  16.62%; 66/397  13.60%; 54/397  86.40%; 343/397 | 52.10%; 87/167  32.34%; 54/167  8.38%; 14/167  1.80%; 3/167  5.39%; 9/167  39.52%; 66/167  26.95%; 45/167  16.77%; 28/167  8.38%; 14/167  8.38%; 14/167  47.31%; 79/167  34.13%; 57/167  8.98%; 15/167  2.40%; 4/167  7.19%; 12/167  40.12%; 67/167  26.35%; 44/167  11.98%; 20/167  12.57%; 21/167  8.98%; 15/167  13.17%; 22/167  19.16%; 32/167  20.36%; 34/167  40.12%; 67/167  7.19%; 12/167  12.57%; 21/167  15.57%; 26/167  22.75%; 38/167  41.92%; 70/167  7.19%; 12/167  4.19%; 7/167  3.59%; 6/167  13.17%; 22/167  71.86%; 120/167  7.19%; 12/167  16.17%; 27/167  83.83%; 140/167 | 69.62%; 369/530  18.87%; 100/530  1.51%; 8/530  1.32%; 7/530  8.68%; 46/530  56.79%; 301/530  23.40%; 124/530  4.53%; 24/530  3.21%; 17/530  12.08%; 64/530  53.58%; 284/530  23.77%; 126/530  5.66%; 30/530  4.91%; 26/530  12.08%; 64/530  43.02%; 228/530  22.08%; 117/530  8.11%; 43/530  11.70%; 62/530  15.09%; 80/530  17.36%; 92/530  20.75%; 110/530  15.85%; 84/530  32.08%; 170/530  13.96%; 74/530  15.09%; 80/530  17.55%; 93/530  18.11%; 96/530  33.96%; 180/530  15.28%; 81/530  4.91%; 26/530  5.47%; 29/530  14.15%; 75/530  61.13%; 324/530  14.34%; 76/530  14.72%; 78/530  85.28%; 452/530 |
| We would like to know which information you received regarding obtaining a second opinion *Please indicate the respective response.*  My physician …  … did inform me about the right to obtain a second opinion.  Yes  No  I do not know  No (valid) response  … gave me a patient information sheet.  Yes  No  I do not know  No (valid) response  … made me aware of a decision-support tool for the surgery.  Yes  No  I do not know  No (valid) response  … brought to my notice where I would find information about suitable second opinions.  Yes  No  I do not know  No (valid) response  … made clear to me that I can take away copies of medical records to obtain a second opinion.  Yes  No  I do not know  No (valid) response  … brought a patient information sheet about the second opinion to my notice.  Yes  No  I do not know  No (valid) response  … brought to my notice that the second opinion cannot be obtained where the operation is supposed to be conducted (insurance of independency).  Yes  No  I do not know  No (valid) response | 43.21%; 226/523  31.17%; 163/523  15.87%; 83/523  9.75%; 51/523  32.12%; 168/523  40.15%; 210/523  16.06%; 84/523  11.66%; 61/523  31.93%; 167/523  39.77%; 208/523  15.68%; 82/523  12.62%; 66/523  24.67%; 129/523  46.27%; 242/523  16.25%; 85/523  12.81%; 67/523  24.47%; 128/523  45.32%; 237/523  16.83%; 88/523  13.38%; 70/523  18.55%; 97/523  49.14%; 257/523  18.93%; 99/523  13.38%; 70/523  17.40%; 91/523 45.12%; 236/523  23.14%; 121/523  14.34%; 75/523 | After the second opinion directive  42.32%; 157/371  31.00%; 115/371  15.09%; 56/371  11.59%; 43/371  30.73%; 114/371  42.32%; 157/371  14.29%; 53/371  12.67%; 47/371  30.19%; 112/371  40.43%; 150/371  15.09%; 56/371  14.29%; 53/371  24.26%; 90/371  46.36%; 172/371  14.56%; 54/371  14.82%; 55/371  25.07%; 93/371  44.20%; 164/371  15.63%/; 58/371  15.09%; 56/371  18.60%; 69/371  49.87%; 185/371  16.17%; 60/371  15.36%; 57/371  16.98%; 63/371  45.82%; 170/371  20.49%; 76/371  16.71%; 62/371 | After the second opinion directive  45.39%; 69/152  31.58%; 48/152  17.76%; 27/152  5.26%; 8/152  35.53%; 54/152  34.87%; 53/152  20.39%; 31/152  9.21%; 14/152  36.18%; 55/152  38.16%; 58/152  17.11%; 26/152  8.55%; 13/152  25.66%; 39/152  46.05%; 70/152  20.39%; 31/152  7.89%; 12/152  23.03%; 35/152  48.03%; 73/152  19.74%; 30/152  9.21%; 14/152  18.42%; 28/152  47.37%; 72/152  25.66%; 39/152  8.55%; 13/152  18.42%; 28/152  43.42%; 66/152  29.61%; 45/152  8.55%; 13/152 | Without second opinion directive |

| Health literacy (HLS)  Median  Min  Max  25. Percentile  75. Percentile  Based on x responses | 12  0  16  9  14  1021 | 12  0  16  9  14  361 | 12  0  16  9  15  177 | 12  0  16  10  14  481 |
| --- | --- | --- | --- | --- |
| Patient autonomy index  Median  Min  Max  25. Percentile  75. Percentile  Based on x responses | 70.45  15.91  100  63.64  77.27  1541 | 63.64  15.91  90.91  56.82  72.73  552 | 75  36.36  100  65.91  84.09  250 | 70.45  40.91  100  63.64  77.27  739 |
| Did you have a surgical removal/ partial removal of the palatine tonsils?  Yes  No  No (valid) response | Only parents | Only parents | Only parents 27.11%; 45/166  68.67%; 114/166  4.22%; 7/166 | Only parents |
| Which gender do you have*?  Male  Female  Diverse  No (valid) response | 27.43%; 448/1633  70.67%; 1154/1633  0.06%; 1/1633  1.84%; 30/1633 | 0.00%; 0/585  100%; 585/585  0.00%; 0/585  0.00%; 0/585 | 20.75%; 55/265  74.72%; 198/265  0.38%; 1/265  4.15%; 11/265 | 50.19%; 393/783  47.38%; 371/783  0.00%; 0/783  2.43%; 19/783 |
| Which gender does your child have?  Male  Female  Diverse  No (valid) response | Only parents | Only parents | Only parents 47.59%; 79/166  48.19%; 80/166  0.00%; 0/166  4,22%; 7/166 | Only parents |

| The results of this survey are assessed for different age categories. Therefore, please indicate month and year of your birth.  Median  Min  Max  25. Percentile  75. Percentile  Based on x responses | 57  18  92  47  65  1577 | 53  26  92  47  66  573 | 34  18  79  31  40  247 | 61  22  92  56  68  757 |
| --- | --- | --- | --- | --- |
| The results of this survey are assessed for different age categories. Therefore, please indicate month and year of your child’s birth.  Median  Min  Max  25. Percentile  75. Percentile  Based on x responses | Only parents | Only parents | Only parents  6  2  17  4  7.75  154 | Only parents |
| Which marital status did you have at the time of the surgery?  Married/Living together in registered civil partnership (same-gender  Unmarried  Divorced/Annulled registered civil partnership (same-gender)  Widowed/Registered civil partner passed away (same-gender)  Married/Living separately in registered civil partnership (same-gender)  No (valid) response | 52.30%; 854/1633  18.74%; 306/1633  10.17%; 166/1633  6.92%; 113/1633  5.63%; 92/1633  6.25%; 102/1633 | 49.74%; 291/585  17.95%; 105/585  11.79%; 69/585  8.38%; 49/585  6.50%; 38/585  5.64%, 33/585 | 44.53%; 118/265  39.62%; 105/265  5.28%; 14/265  0.38%; 1/265  4.15%; 11/265  6.04%; 16/265 | 56.83%; 445/783  12.26%; 96/783  10.60%; 83/783  8.05%; 63/783  5.49%; 43/783  6.77%; 53/783 |
| Were you living in a partnership with someone in your household at the time of your surgery?  Yes  No  No (valid) response | 38.70%; 632/1633  27.74%; 453/1633  33.56%; 548/1633 | 38.29%; 224/585  30.60%; 179/585  31.11%; 182/585 | 36.60%; 97/265  28.68%; 76/265  34.72%; 92/265 | 39.72%; 311/783  25.29%; 198/783  34.99%; 274/783 |
| What was your highest education status at the time of your surgery?  Polytechnical Oberschule of the GDR with the degree after grade ten  Realschule leaving certificate (Mittlere Reife) or equivalent degree  Abitur/General or subject-specific higher education entrance qualification  Polytechnical Oberschule of the GDR with the degree after grade eight or nine  Hauptschule leaving certificate (Volksschule leaving certificate) or equivalent  Fachhochschulreife, leaving certificate from a Fachoberschule  Left school without degree  Student attending a full time school for general education  Degree of another type of school  No (valid) response | 32.03%; 523/1633  11.82%; 193/1633  9.68%; 158/1633  9.31%; 152/1633  8.27%; 135/1633  5.27%; 86/1633  2.63%; 39/1633  2.39/; 39/1633  5.76%; 94/1633  12.86%; 210/1633 | 32.31%; 189/585  12.14%; 71/585  9.91%; 58/585  7.01%; 41/585  7.18%; 42/585  5.30%; 31/585  3.25%; 19/585  1.54%; 9/585  6.32%; 37/585  15.04%; 88/585 | 5.28%; 14/265  26.04%; 69/265  19.25%; 51/265  1.89%; 5/265  8.30%; 22/265  11.32%; 30/265  2.64%; 7/265  4.91%; 13/265  10.94%; 29/265  9.43%; 25/265 | 40.87%; 320/783  6.77%; 53/783  6.26%; 49/783  13.54%; 106/783  9.07%; 71/783  3.19%; 25/783  2.17%; 17/783  2.17%; 17/783  3.58%; 28/783  12.39%; 97/783 |
| What was your highest professional education status at the time of your surgery?  Vocational qualification (duration at least 1 year) completed  Higher education degree  Without vocational qualification  Vocational qualification ongoing  No (valid) response | 57.26%; 935/1633  9.61%; 157/1633  9.49%; 155/1633  1.29; 21/1633  22.35%; 365/1633 | 53.33%; 61/585  10.43%; 61/585  11.28%; 66/585  0.51%; 3/585  24.44%; 143/585 | 48.68%; 129/265  16.60%; 44/265  16.60%; 44/265  5.66%; 15/265  12.45%; 33/265 | 63.09%; 494/783  6.64%; 52/783  5.75%; 45/783  0.38%; 3/783  24.14%; 189/783 |
| For the classification of your place of residence in small town, city of medium size, and big city or metropole we would like to know your postcode at the time of your surgery  High population density  Medium population density  Low population density  No (valid) response | 32.70%; 534/1633  13.66%; 223/1633  24.56%; 401/1633  29.09%; 475/1633 | 36.41%; 213/585  15.73%; 92/585  20.34%; 119/585  27.52%; 161/585 | 38.87%; 103/265  17.36%; 46/265  18.11%; 48/265  25.66%; 68/265 | 27.84%; 218/783  10.86%; 85/783  29.89%; 234/783  31.42%; 246/783 |
| How many people did live in your household, including yourself, at the time of your surgery?  Only one person  Multiple persons  No (valid) response  If multiple, how many?  Median  Min  Max  25. Percentile  75. Percentile  Based on x responses | 33.93%; 554/1633  59.22%; 967/1633  6.86%; 112/1633  2  2  9  2  3  879 | 34.70%; 203/585  58.56%; 342/585  6.84%; 40/585  2  2  8  2  3  308 | 15.47%; 41/265  76.98%; 204/265  7.55%; 20/265  4  2  9  3  4  191 | 39.59%; 310/783  53.77%; 421/783  6.64%; 52/783  2  2  6  2  3  380 |
| How many people were older than 14 years at the time of your surgery?  Median  Min  Max  25. Percentile  75. Percentile  Based on x responses | 2  1  7  2  2  871 | 2  1  7  1  3  313 | 2  1  5  2  2  182 | 2  1  5  1  2  376 |
| For the assessment according to groups (e. g. low income, middle income, high income), we would like to know: How high was the average monthly income after taxes of your household in total at the time of your surgery?  0 – 450 euro  451 – 850 euro  851 – 1000 euro  1001 – 1250 euro  1251 – 1500 euro  1501 – 1750 euro  1751 – 2000 euro  2001 – 2250 euro  2251 – 2500 euro  2501 – 2750 euro  2751 – 3000 euro  3001 – 3250 euro  3251 – 3500 euro  3501 – 3750 euro  3751 – 4000 euro  4001 – 4500 euro  4501 – 5000 euro  5001 – 5500 euro  5501 – 6000 euro  6001 – 7500 euro  7501 – 10.000 euro  10.001 – 20.000 euro  More than 20.000 euro  No (valid) response | 3.80%; 62/1633  6.74%; 110/1633  7.04%; 115/1633  7.04%; 115/1633  8.94%; 146/1633  7.65%; 125/1633  7.65%; 125/1633  5.51%; 90/1633  5.70%; 93/1633  4.10%; 67/1633  3.55%; 58/1633  2.82%; 46/1633  2.51%; 41/1633  1.47%; 24/1633  1.90%; 31/1633  2.14%; 35/1633  1.90%; 31/1633  0.43%; 7/1633  0.31%; 5/1633  0.55%; 9/1633  0.18%; 3/1633  0.06%; 1/1633  0.12%; 2/1633  17.88%; 292/1633 | 4.27%; 25/585  5.98%; 35/585  8.03%; 47/585  7.86%; 46/585  8.72%; 51/585  6.32%; 37/585  6.67%; 39/585  5.98%; 35/585  6.50%; 38/585  4.96%; 29/585  3.76%; 22/585  2.91%; 17/585  1.88%; 11/585  0.68%; 4/585  1.88%; 11/585  1.88%; 11/585  1.37%; 8/585  0.51%; 3/585  0.17%; 1/585  0.51%; 3/585  0.34%; 2/585  0.00%; 0/585  0.17%; 1/585  18.63%; 109/585 | 2.26%; 6/265  5.66%; 15/265  7.55%; 20/265  6.97%; 18/265  6.04%; 16/265  5.66%; 15/265  9.43%; 25/265  2.26%; 6/265  5.28%; 14/265  1.89%; 5/265  1.13%; 3/265  4.91%; 13/265  2.64%; 7/265  3.02%; 8/265  3.40%; 9/265  3.02%; 8/265  4.91%; 13/265  0.75%; 2/265  0.38%; 1/265  1.13%; 3/265  0.38%; 1/265  0.38%; 1/265  0.00%; 0/265  21.13%; 56/265 | 3.96%; 31/783  7.66%; 60/783  6.13%; 48/783  6.51%; 51/783  10.09%; 79/783  9.32%; 73/783  7.79%; 61/783  6.26%; 49/783  5.24%; 41/783  4.21%; 33/783  4.21%; 33/783  2.04%; 16/783  2.94%;23/783  1.53%; 12/783  1.40%; 11/783  2.04%; 16/783  1.28%; 10/783  0.26%; 2/783  0.38%; 3/783  0.38%; 3/783  0.00%; 0/783  0.00%; 0/783  0.13%; 1/783  16.22%; 127/783 |
