# Supplementary material for: Decision for elective surgery - how well informed are patients and how easy is the decision for them?
Source: Research Square preprint supplement (doi:10.21203/rs.3.rs-4358526/v1), 2024-05-10
Supplement: Supplementary file 4 [file 8dab4636740a957e6f600b59.docx]

**Appendix 3 Questionnaires (German)**

**Einleitung**

*Sie haben eine operative Entfernung der Gebärmutter durchführen lassen. Dafür haben Sie vorher von einer Ärztin oder einem Arzt oder auch von mehreren Ärztinnen oder Ärzten eine Empfehlung zur operativen Entfernung der Gebärmutter erhalten.*

*Wir wollen im Folgenden herausfinden, wie Sie die Entscheidung für diese Operation getroffen haben, also z.B. welche Beratungsangebote Sie in Anspruch genommen haben. Außerdem würden wir gerne erfahren, wie zufrieden Sie mit den Informationen bezüglich einer operativen Entfernung der Gebärmutter waren und ob Sie möglicherweise eine weitere Ärztin oder einen weiteren Arzt konsultiert haben.*

*Bitte beachten Sie, dass bei personenbezogenen Bezeichnungen aus Gründen der Lesbarkeit nur die männliche Form gewählt wurde. Nichtsdestotrotz beziehen sich die Angaben auf alle Geschlechter.*

**Allgemeines zu Ihrer Operation**

1. Welche Gründe haben zur Empfehlung der operativen Entfernung der Gebärmutter geführt? *Mehrfachnennungen sind möglich.*

*○* Myome (gutartige Tumore)

*○* Endometriose

*○* Bösartige Tumore (Krebs)

*○* Gebärmuttersenkung

*○* Starke Regelblutung

*○* Andere: _________ ___

*○* Ich weiß nicht

1. Wann wurde die Operation durchgeführt?

Monat Jahr

☐☐ ☐☐☐☐

1. Wer hat die Empfehlung zu Ihrer operativen Gebärmutterentfernung als erstes ausgesprochen? *Bitte kreuzen Sie nur eine Antwort an.*

*○* Ein Arzt in einer Arztpraxis

*○* Ein Arzt im Krankenhaus (gemeint ist nicht das OP Aufklärungsgespräch)

*○* Andere: _________ ___

**Fragen zu dem Entscheidungsprozess und Informationen über die Operation**

1. Inwiefern hat sich Ihr Gesundheitszustand nach der Entfernung der Gebärmutter verändert? *Bitte kreuzen Sie das für Sie am meisten Zutreffende an.*

| Starke Verschlechterung | Leichte Verschlechterung | Keine Veränderung | Leichte Verbesserung | Starke Verbesserung |  |
| --- | --- | --- | --- | --- | --- |
| *○* | *○* | *○* | *○* | *○* |  |

1. Denken Sie bitte zurück an die Zeit, in der Sie die Entscheidung für die Operation getroffen haben. Wie empfanden Sie die Entscheidung? *Bitte kreuzen Sie das für Sie am meisten Zutreffende an.*

| Sehr schwierig | Schwierig | Mittel | Leicht | Sehr leicht |  |
| --- | --- | --- | --- | --- | --- |
| *○* | *○* | *○* | *○* | *○* |  |

1. Wie dringlich haben Sie die Entscheidung empfunden? *Bitte kreuzen Sie das für Sie am meisten Zutreffende an.*

| Sehr dringlich | Dringlich | Mittel | Weniger dringlich | Gar nicht dringlich |  |
| --- | --- | --- | --- | --- | --- |
| *○* | *○* | *○* | *○* | *○* |  |

1. Denken Sie bitte zurück an das Gespräch mit Ihrem Arzt, der Ihnen erstmals eine Gebärmutterentfernung empfohlen hat. *Bitte kreuzen Sie das für Sie am meisten Zutreffende an*.

| **Wie fühlten Sie sich aufgeklärt hinsichtlich …** | Sehr schlecht | Schlecht | Mittel | Gut | Sehr gut |
| --- | --- | --- | --- | --- | --- |
| … Ihrer Erkrankung? | *○* | *○* | *○* | *○* | *○* |
| … der Behandlungsalternativen? | *○* | *○* | *○* | *○* | *○* |
| … der Vorteile der Operation? | *○* | *○* | *○* | *○* | *○* |
| … der Risiken und Nebenwirkungen der Operation? | *○* | *○* | *○* | *○* | *○* |

1. Denken Sie bitte zurück an das Gespräch mit Ihrem Arzt, der Ihnen erstmals eine Gebärmutterentfernung empfohlen hat. *Bitte kreuzen Sie das für Sie am meisten Zutreffende an.*

|  | Sehr schlecht | Schlecht | Mittel | Gut | Sehr gut |
| --- | --- | --- | --- | --- | --- |
| Wie nachvollziehbar war die Empfehlung zur Operation für Sie? | *○* | *○* | *○* | *○* | *○* |
| Wie verständlich waren die Informationen, die Sie erhielten? | *○* | *○* | *○* | *○* | *○* |
| Wie fühlten Sie sich insgesamt aufgeklärt? | *○* | *○* | *○* | *○* | *○* |

1. Hätten Sie sich vor der Operation zusätzliche Informationen gewünscht? *Mehrfachnennungen sind möglich.*

*○* Ja, ich wünschte mir mehr Informationen über…

*○* … die Erkrankung

*○* … die Behandlungsmöglichkeiten

*○* … die Vorteile einer Operation

*○* … die Nachteile einer Operation

*○* Andere: _________ ___

*○* Nein, ich wünschte mir keine zusätzlichen Informationen.

1. Haben Sie sich vor der Operation woanders Informationen zu der Diagnose oder Behandlung eingeholt? *Mehrfachnennungen sind möglich.*

*○* Ja, ich habe…

*○* … im Internet recherchiert

*○* … mit Angehörigen/Freunden gesprochen

*○* … bei der Krankenkasse nachgefragt

*○* … medizinisches Fachpersonal (z.B. Arzt, Krankengymnast) befragt

*○* Anderes: _________ __

*○* Nein 🡪 *Weiter mit Frage 16)*

1. FallsSie sich weitere Informationen eingeholt haben, welche Quelle war für Sie die wichtigste?

|  |
| --- |

1. Denken Sie bitte nun nur an die Quelle, die für Sie am wichtigsten war, also über das Gespräch mit Ihrem Arzt, der Ihnen erstmals eine Gebärmutterentfernung empfohlen hat, hinaus. *Bitte kreuzen Sie das für Sie am meisten Zutreffende an.*

|  | Sehr schwer | Schwer | Mittel | Leicht | Sehr leicht |
| --- | --- | --- | --- | --- | --- |
| Wie war es für Sie zusätzliche Informationen aus der anderen Quelle zu erhalten? | *○* | *○* | *○* | *○* | *○* |
| Wie verständlich waren die zusätzlichen Informationen aus der anderen Quelle? | *○* | *○* | *○* | *○* | *○* |

1. Wie vertrauenswürdig fanden Sie die zusätzlichen Informationen aus der anderen Quelle? Berücksichtigen Sie bitte nur die Quelle, die für Sie am wichtigsten war. *Bitte kreuzen Sie das für Sie am meisten Zutreffende an.*

| Nicht vertrauenswürdig | Weniger vertrauenswürdig | Mittel | Eher vertrauenswürdig | Sehr vertrauenswürdig |  |
| --- | --- | --- | --- | --- | --- |
| *○* | *○* | *○* | *○* | *○* |  |

1. Inwiefern haben die zusätzlichen Informationen aus der anderen Quelle zu Ihrer Entscheidung beigetragen? Berücksichtigen Sie bitte nur die Quelle, die für Sie am wichtigsten war. *Bitte kreuzen Sie das für Sie am meisten Zutreffende an.*

| Gar nicht | Wenig | Mittel | Etwas | Sehr stark |  |
| --- | --- | --- | --- | --- | --- |
| *○* | *○* | *○* | *○* | *○* |  |

1. Inwiefern haben Sie die zusätzlichen Informationen aus der anderen Quelle verunsichert?Berücksichtigen Sie bitte nur die Quelle, die für Sie am wichtigsten war. *Bitte kreuzen Sie das für Sie am meisten Zutreffende an.*

| Gar nicht | Wenig | Mittel | Etwas | Sehr stark |  |
| --- | --- | --- | --- | --- | --- |
| *○* | *○* | *○* | *○* | *○* |  |

1. Bitte denken Sie noch einmal intensiv über den gesamten Entscheidungsprozess für die Operation nach. Wie haben Sie den Entscheidungsprozess empfunden? *Bitte kreuzen Sie für jede der Aussagen das für Sie am meisten Zutreffende an.*

|  | Trifft über-haupt nicht zu | Trifft eher nicht zu | Trifft teil-weise zu | Trifft eher zu | Trifft voll-ständig zu |
| --- | --- | --- | --- | --- | --- |
| Ich wusste, welche Wahlmöglichkeiten ich hatte. | *○* | *○* | *○* | *○* | *○* |
| Ich kannte die Vorteile jeder Wahlmöglichkeit. | *○* | *○* | *○* | *○* | *○* |
| Ich kannte die Risiken und Nebenwirkungen jeder Wahlmöglichkeit. | *○* | *○* | *○* | *○* | *○* |
| Ich war mir darüber im Klaren, welche Vorteile für mich am wichtigsten waren. | *○* | *○* | *○* | *○* | *○* |
| Ich war mir darüber im Klaren, welche Risiken und Nebenwirkungen für mich am wichtigsten waren. | *○* | *○* | *○* | *○* | *○* |
| Ich war mir darüber im Klaren, was mir wichtiger war (Vorteile oder Risiken und Nebenwirkungen). | *○* | *○* | *○* | *○* | *○* |
| Ich hatte genug Unterstützung von Anderen, um diese Entscheidung zu treffen. | *○* | *○* | *○* | *○* | *○* |
| Ich traf diese Entscheidung ohne Druck von Anderen. | *○* | *○* | *○* | *○* | *○* |
| Ich hatte genügend Beratung, um diese Entscheidung zu treffen. | *○* | *○* | *○* | *○* | *○* |
| Ich war mir darüber im Klaren, was für mich die beste Wahl war. | *○* | *○* | *○* | *○* | *○* |
| Ich war mir sicher, wofür ich mich entscheiden sollte. | *○* | *○* | *○* | *○* | *○* |
| Diese Entscheidung fiel mir leicht. | *○* | *○* | *○* | *○* | *○* |
| Ich hatte das Gefühl eine informierte Entscheidung getroffen zu haben. | *○* | *○* | *○* | *○* | *○* |
| Meine Entscheidung zeigte, was mir wichtig ist. | *○* | *○* | *○* | *○* | *○* |
| Ich war mit meiner Entscheidung zufrieden. | *○* | *○* | *○* | *○* | *○* |

1. Wir möchten gerne erfahren, wie Sie nun nachträglich über Ihre Entscheidung für die Operation denken. *Bitte kreuzen Sie für jede der Aussagen das für Sie am meisten Zutreffende an.*

|  | Ich stimme überein | Ich stimme eher überein | Weder noch | Ich stimme eher nicht überein | Ich stimme nicht überein |
| --- | --- | --- | --- | --- | --- |
| Es war die richtige Entscheidung. | *○* | *○* | *○* | *○* | *○* |
| Ich bereue die Wahl, die ich getroffen habe. | *○* | *○* | *○* | *○* | *○* |
| Ich würde die gleiche Wahl wieder treffen, wenn ich die Entscheidung erneut treffen müsste. | *○* | *○* | *○* | *○* | *○* |
| Die Wahl hat mir viel Leid bereitet. | *○* | *○* | *○* | *○* | *○* |
| Die Entscheidung war vernünftig. | *○* | *○* | *○* | *○* | *○* |

**Fragen zu einer Zweitmeinung**

*Unter einer Zweitmeinung verstehen wir, dass Sie sich mit einer konkreten medizinischen Fragestellung bei einem weiteren Arzt vorstellen, beispielsweise um eine Diagnose oder einen Behandlungsvorschlag Ihres Arztes abzusichern oder nach Alternativen zu suchen. In Ihrem Fall bedeutet dies, dass Sie sich nach der Empfehlung für die operative Gebärmutterentfernung bei einem anderen Arzt eine Zweitmeinung eingeholt haben, bevor Sie sich der Operation unterzogen haben.*

1. Haben Sie vor der operativen Entfernung der Gebärmutter eine Zweitmeinung in Anspruch genommen?

*○* Ja

*○* Nein 🡪*Weiter mit Frage 24)*

1. Falls Sie eine Zweitmeinung in Anspruch genommen haben, bei wem haben Sie die Zweitmeinung eingeholt? *Bitte kreuzen Sie nur eine Antwort an.*

*○* Arzt in einer Arztpraxis

*○* Arzt im Krankenhaus (gemeint ist nicht das OP Aufklärungsgespräch)

*○* Krankenkasse

*○* Andere: _ _______________

1. Hat der Arzt, bei dem Sie eine Zweitmeinung eingeholt haben, auch die Operation durchgeführt? Bitte beziehen Sie sich nicht auf das OP-Aufklärungsgespräch, sondern nur auf den Fall, dass Sie sich bei diesem Arzt aktiv um eine Zweitmeinung bemüht haben.

*○* Ja

*○* Nein

1. Wurde die Erstmeinung durch die Zweitmeinung bestätigt?

*○* Ja

*○* Teilweise

*○* Nein

1. Inwiefern hat die Zweitmeinung zu Ihrer Entscheidung beigetragen?

*○* Ich war mir nach Einholung der Zweitmeinung sicher, welche Behandlung ich wählen soll.

*○* Ich war mir nach Einholung der Zweitmeinung trotzdem nicht sicher, welche Behandlung ich wählen

soll.

1. Haben Sie sich im Anschluss noch eine dritte Meinung eingeholt?

*○* Ja

*○* Nein

1. Neben einem persönlichen Arzt-Patienten-Kontakt gibt es auch andere Optionen, eine Zweitmeinung einzuholen. Beispielsweise besteht die Möglichkeit, die Befundunterlagen dem Zweitmeiner zuzusenden und eine telefonische oder schriftliche Stellungnahme zu erhalten. Wir würden im Folgenden gerne wissen, welche Optionen zur Einholung einer Zweitmeinung bezüglich der Gebärmutterentfernung für Sie in Frage gekommen sind. *Bitte kreuzen Sie für jede Möglichkeit eine Antwort an.*

|  | Kam nicht in Frage | Kam eher nicht in Frage | Neutral | Kam eher in Frage | Kam in Frage |
| --- | --- | --- | --- | --- | --- |
| Persönliche Beratung vor Ort | *○* | *○* | *○* | *○* | *○* |
| Telefonische Beratung | *○* | *○* | *○* | *○* | *○* |
| Schriftliche Beratung per E-Mail/Post | *○* | *○* | *○* | *○* | *○* |

1. Wenn Sie sich **keine** Zweitmeinung eingeholt haben, welche Gründe gab es dafür? *Bitte kreuzen Sie für jede der Aussagen das für Sie am meisten Zutreffende an. Wenn Sie eine Zweitmeinung eingeholt haben 🡪 weiter mit Frage 26)*

| **Ich habe keine Zweitmeinung eingeholt, weil ich…** | Trifft  überhaupt  nicht zu | Trifft eher nicht zu | Trifft eher zu | Trifft  vollständig  zu |
| --- | --- | --- | --- | --- |
| … mir den Eingriff, unabhängig davon, was ein weiterer Arzt sagt, wünschte. | *○* | *○* | *○* | *○* |
| … den Eingriff als letzte Möglichkeit sah. | *○* | *○* | *○* | *○* |
| … vollstes Vertrauen in meinen Arzt hatte und die Entscheidung in seine Hände legte. | *○* | *○* | *○* | *○* |
| … Angst hatte, dass sich das Verhältnis zu meinem Arzt durch das Einholen einer Zweitmeinung verschlechtert. | *○* | *○* | *○* | *○* |
| … dachte, dass zu viele Meinungen nur zu Verunsicherung führen. | *○* | *○* | *○* | *○* |
| … genügend Informationen hatte und mich dann anhand dieser entschieden habe. | *○* | *○* | *○* | *○* |
| … fand, dass der Aufwand, den ich zur Einholung der Zweitmeinung erbringen musste, zu hoch war. | *○* | *○* | *○* | *○* |
| Andere Gründe gegen die Einholung einer Zweitmeinung: | | | | |

**Gesundheitsbezogene Daten und soziodemographische Daten**

*Im Folgenden stellen wir Ihnen Fragen zu Ihrer Gesundheit bzw. Ihrem Gesundheitsverhalten sowie einige soziodemographische Fragen. Die Angaben helfen, die Ergebnisse dieser Umfrage zu untersuchen bzw. auszuwerten. Wir möchten Sie hier nochmals darauf hinweisen, dass die Befragung anonym ist, d.h. dass keine Rückschlüsse auf Ihre Person gezogen werden können.*

1. Die folgenden Fragen beziehen sich darauf, wie Sie mit Gesundheitsinformationen umgehen. *Bitte kreuzen Sie für jede der Fragen das für Sie am meisten Zutreffende an.*

| **Wie einfach/ schwierig ist es, …** | Sehr schwierig | Ziemlich schwierig | Ziemlich einfach | Sehr einfach | Weiß nicht |
| --- | --- | --- | --- | --- | --- |
| … Informationen über Unterstützungsmöglich-keiten bei psychischen Problemen, wie Stress oder Depression, zu finden? | *○* | *○* | *○* | *○* | *○* |
| … Informationen über Verhaltensweisen zu finden, die gut für Ihr psychisches Wohlbefinden sind? | *○* | *○* | *○* | *○* | *○* |
| … herauszufinden, wo Sie professionelle Hilfe erhalten, wenn Sie krank sind? | *○* | *○* | *○* | *○* | *○* |
| … Informationen über Krankheitssymptome, die Sie betreffen, zu finden? | *○* | *○* | *○* | *○* | *○* |
| … Informationen in den Medien darüber, wie Sie Ihren Gesundheitszustand verbessern können, zu verstehen? | *○* | *○* | *○* | *○* | *○* |
| … Gesundheitsratschläge von Familien-mitgliedern oder Freunden zu verstehen? | *○* | *○* | *○* | *○* | *○* |
| … zu verstehen, was Ihr Arzt Ihnen sagt? | *○* | *○* | *○* | *○* | *○* |
| … zu verstehen, warum Sie Vorsorgeuntersuchungen brauchen? | *○* | *○* | *○* | *○* | *○* |
| … die Anweisungen Ihres Arztes oder Apothekers zur Einnahme der verschriebenen Medikamente zu verstehen? | *○* | *○* | *○* | *○* | *○* |
| … Gesundheitswarnungen vor Verhaltens-weisen wie Rauchen, wenig Bewegung oder übermäßiges Trinken zu verstehen? | *○* | *○* | *○* | *○* | *○* |
| … zu beurteilen, ob die Informationen über Gesundheitsrisiken in den Medien vertrauenswürdig sind? | *○* | *○* | *○* | *○* | *○* |
| … zu beurteilen, wann Sie eine zweite Meinung von einem anderen Arzt einholen sollten? | *○* | *○* | *○* | *○* | *○* |
| … zu beurteilen, welche Alltagsgewohnheiten mit Ihrer Gesundheit zusammenhängen? | *○* | *○* | *○* | *○* | *○* |
| … aufgrund von Informationen aus den Medien zu entscheiden, wie Sie sich vor Krankheiten schützen können? | *○* | *○* | *○* | *○* | *○* |
| … mit Hilfe der Informationen, die Ihnen der Arzt gibt, Entscheidungen bezüglich Ihrer Krankheit zu treffen? | *○* | *○* | *○* | *○* | *○* |
| … den Anweisungen Ihres Arztes oder Apothekers zu folgen? | *○* | *○* | *○* | *○* | *○* |

1. Die folgenden Aussagen beziehen sich darauf, wie umfangreich Sie von Ihrem Arzt informiert werden und an den Entscheidungen teilhaben möchten. *Bitte kreuzen Sie für jede der Aussagen das für Sie am meisten Zutreffende an.*

|  | Sehr dafür | Etwas dafür | Neutral | Etwas dagegen | Sehr dagegen |
| --- | --- | --- | --- | --- | --- |
| Wichtige medizinische Entscheidungen sollten von Ihrem Arzt/Ihrer Ärztin getroffen werden und nicht von Ihnen. | *○* | *○* | *○* | *○* | *○* |
| Sie sollten sich dem Rat Ihres Arztes/Ihrer Ärztin anschließen, auch wenn Sie anderer Meinung sind. | *○* | *○* | *○* | *○* | *○* |
| Während der Behandlung im Krankenhaus sollten Sie keine Entscheidungen über Ihre eigene Behandlung treffen. | *○* | *○* | *○* | *○* | *○* |
| Sie werden krank und Ihre Erkrankung verschlechtert sich. Möchten Sie, dass Ihr Arzt/Ihre Ärztin Ihre Behandlung in stärkerem Maße in die Hand nimmt? | *○* | *○* | *○* | *○* | *○* |
| Je mehr sich Ihre Erkrankung verschlechtert, umso mehr sollten Sie über Ihre Erkrankung aufgeklärt werden. | *○* | *○* | *○* | *○* | *○* |
| Sie sollten vollständig verstehen, was infolge der Krankheit in Ihrem Körper vor sich geht. | *○* | *○* | *○* | *○* | *○* |
| Auch bei schlechten Untersuchungs-ergebnissen, sollten Sie umfassend informiert werden. | *○* | *○* | *○* | *○* | *○* |
| Ihr Arzt/Ihre Ärztin sollte Ihnen den Zweck der Laboruntersuchungen erklären. | *○* | *○* | *○* | *○* | *○* |
| Es ist wichtig für Sie, alle Nebenwirkungen Ihrer Medikamente zu kennen. | *○* | *○* | *○* | *○* | *○* |
| Informationen über Ihre Krankheit sind für Sie genauso wichtig wie die Behandlung selbst. | *○* | *○* | *○* | *○* | *○* |
| Wenn es mehr als eine Möglichkeit der Behandlung gibt, sollten Sie über alle informiert werden. | *○* | *○* | *○* | *○* | *○* |

| 1. Die Ergebnisse dieser Befragung werden auch für unterschiedliche Altersgruppen ausgewertet. Bitte nennen Sie dazu Monat und Jahr Ihrer Geburt.   Geburtsmonat Geburtsjahr  ☐☐ ☐☐☐☐ |
| --- |
| 1. Welchen Familienstand hatten Sie zur Zeit Ihrer Operation?   *○* Verheiratet/In eingetragener Lebenspartnerschaft (gleichgeschlechtlich), zusammenlebend 🡪 *Weiter mit Frage 31)*  *○* Verheiratet/In eingetragener Lebenspartnerschaft (gleichgeschlechtlich), getrennt lebend  *○* Geschieden/Eingetragene Lebenspartnerschaft aufgehoben (gleichgeschlechtlich)  *○* Verwitwet/Eingetragene/r Lebenspartner/-in verstorben (gleichgeschlechtlich)  *○* Ledig |
| 1. Lebten Sie zur Zeit Ihrer Operation mit einer Person aus Ihrem Haushalt in einer Partnerschaft?   *○* Ja  *○* Nein |
| 1. Welchen höchsten allgemeinbildenden Schulabschluss Sie zur Zeit Ihrer Operation?   *○* Schüler/-in, besuche eine allgemeinbildende Vollzeitschule  *○* Von der Schule abgegangen ohne Schulabschluss  *○* Hauptschulabschluss (Volksschulabschluss) oder gleichwertiger Abschluss  *○* Polytechnische Oberschule der DDR mit Abschluss der 8. oder 9. Klasse  *○* Realschulabschluss (Mittlere Reife) oder gleichwertiger Abschluss  *○* Polytechnische Oberschule der DDR mit Abschluss der 10. Klasse  *○* Fachhochschulreife  *○* Abitur/Allgemeine oder fachgebundene Hochschulreife  *○* Einen anderen Schulabschluss, und zwar: ___________________________________ |
| 1. Was war Ihr höchster beruflicher Ausbildungsstatus zur Zeit Ihrer Operation?   *○*Noch in beruflicher Ausbildung  *○*Ohne beruflichen Ausbildungsabschluss  *○* Abschluss einer beruflichen Ausbildung von mindestens einem Jahr  *○*Hochschulabschluss |
| 1. Für die Einordnung Ihres Wohnortes in eine Kleinstadt/ Mittelstadt/Großstadt würden wir gerne Ihre Postleitzahl zur Zeit Ihrer Operation wissen: ______________ |
| 1. Wie viele Personen lebten zur Zeit Ihrer Operation ständig in Ihrem Haushalt, Sie selbst eingeschlossen?   *○* Nur eine Person 🡪*Machen Sie bitte mit Frage 36) weiter.*  *○* Mehrere Personen, und zwar: ___ ___ |
| 1. Wie viele Personen waren zur Zeit Ihrer Operation in Ihrem Haushalt über 14 Jahre alt? _____ ___ |
| 1. Für die Auswertung nach Gruppen (z.B. niedriges Einkommen, mittleres Einkommen, hohes Einkommen) würden wir gerne wissen: Wie hoch war das durchschnittliche monatliche Nettoeinkommen Ihres Haushalts insgesamt zur Zeit Ihrer Operation?   *(Nehmen Sie die Summe aus Lohn/Gehalt, Einkommen aus selbstständiger Tätigkeit, Rente oder Pension, Einkünfte aus öffentlichen Beihilfen, Einkommen aus Vermietung und Verpachtung, Wohngeld, Kindergeld und sonstige Einkünfte und ziehen Sie dann Steuern und Sozialversicherungsbeiträge ab)*   | *○* 0 – 450 Euro  *○* 451 – 850 Euro  *○* 851 – 1000 Euro  *○* 1001 – 1250 Euro  *○* 1251 – 1500 Euro  *○* 1501 – 1750 Euro  *○* 1751 – 2000 Euro  *○* 2001 – 2250 Euro | *○* 2251 – 2500 Euro  *○* 2501 – 2750 Euro  *○* 2751 – 3000 Euro  *○* 3001 – 3250 Euro  *○* 3251 – 3500 Euro  *○* 3501 – 3750 Euro  *○* 3751 – 4000 Euro  *○* 4001 – 4500 Euro | *○* 4500 – 5000 Euro  *○* 5001 – 5500 Euro  *○* 5501 – 6000 Euro  *○* 6001 – 7500 Euro  *○* 7501 – 10.000 Euro  *○* 10.001 – 20.000 Euro  *○* Mehr als 20.000 Euro  *○* Keine Angabe | | --- | --- | --- | |

*Falls Sie noch Anmerkungen zu unserer Befragung haben oder uns etwas mitteilen möchten, haben Sie hier die Möglichkeit.*

|  |
| --- |

*Wir bedanken uns vielmals für Ihre Unterstützung!*

**Einleitung**

*Sie haben eine operative Entfernung der Gebärmutter durchführen lassen. Dafür haben Sie vorher von einer Ärztin oder einem Arzt oder auch von mehreren Ärztinnen oder Ärzten eine Empfehlung zur operativen Entfernung der Gebärmutter erhalten.*

*Wir wollen im Folgenden herausfinden, wie Sie die Entscheidung für diese Operation getroffen haben, also z.B. welche Beratungsangebote Sie in Anspruch genommen haben. Außerdem würden wir gerne erfahren, wie zufrieden Sie mit den Informationen bezüglich einer operativen Entfernung der Gebärmutter waren und ob Sie möglicherweise eine weitere Ärztin oder einen weiteren Arzt konsultiert haben.*

*Bitte beachten Sie, dass bei personenbezogenen Bezeichnungen aus Gründen der Lesbarkeit nur die männliche Form gewählt wurde. Nichtsdestotrotz beziehen sich die Angaben auf alle Geschlechter.*

**Allgemeines zu Ihrer Operation**

1. Welche Gründe haben zur Empfehlung der operativen Entfernung der Gebärmutter geführt? *Mehrfachnennungen sind möglich.*

*○* Myome (gutartige Tumore)

*○* Endometriose

*○* Bösartige Tumore (Krebs)

*○* Gebärmuttersenkung

*○* Starke Regelblutung

*○* Andere: _________ ___

*○* Ich weiß nicht

1. Wann wurde die Operation durchgeführt?

Monat Jahr

☐☐ ☐☐☐☐

1. Wer hat die Empfehlung zu Ihrer operativen Gebärmutterentfernung als erstes ausgesprochen? *Bitte kreuzen Sie nur eine Antwort an.*

*○* Ein Arzt in einer Arztpraxis

*○* Ein Arzt im Krankenhaus (gemeint ist nicht das OP Aufklärungsgespräch)

*○* Andere: _________ ___

**Fragen zu dem Entscheidungsprozess und Informationen über die Operation**

1. Inwiefern hat sich Ihr Gesundheitszustand nach der Entfernung der Gebärmutter verändert? *Bitte kreuzen Sie das für Sie am meisten Zutreffende an.*

| Starke Verschlechterung | Leichte Verschlechterung | Keine Veränderung | Leichte Verbesserung | Starke Verbesserung |  |
| --- | --- | --- | --- | --- | --- |
| *○* | *○* | *○* | *○* | *○* |  |

1. Denken Sie bitte zurück an die Zeit, in der Sie die Entscheidung für die Operation getroffen haben. Wie empfanden Sie die Entscheidung? *Bitte kreuzen Sie das für Sie am meisten Zutreffende an.*

| Sehr schwierig | Schwierig | Mittel | Leicht | Sehr leicht |  |
| --- | --- | --- | --- | --- | --- |
| *○* | *○* | *○* | *○* | *○* |  |

1. Wie dringlich haben Sie die Entscheidung empfunden? *Bitte kreuzen Sie das für Sie am meisten Zutreffende an.*

| Sehr dringlich | Dringlich | Mittel | Weniger dringlich | Gar nicht dringlich |  |
| --- | --- | --- | --- | --- | --- |
| *○* | *○* | *○* | *○* | *○* |  |

1. Denken Sie bitte zurück an das Gespräch mit Ihrem Arzt, der Ihnen erstmals eine Gebärmutterentfernung empfohlen hat. *Bitte kreuzen Sie das für Sie am meisten Zutreffende an*.

| **Wie fühlten Sie sich aufgeklärt hinsichtlich …** | Sehr schlecht | Schlecht | Mittel | Gut | Sehr gut |
| --- | --- | --- | --- | --- | --- |
| … Ihrer Erkrankung? | *○* | *○* | *○* | *○* | *○* |
| … der Behandlungsalternativen? | *○* | *○* | *○* | *○* | *○* |
| … der Vorteile der Operation? | *○* | *○* | *○* | *○* | *○* |
| … der Risiken und Nebenwirkungen der Operation? | *○* | *○* | *○* | *○* | *○* |

1. Denken Sie bitte zurück an das Gespräch mit Ihrem Arzt, der Ihnen erstmals eine Gebärmutterentfernung empfohlen hat. *Bitte kreuzen Sie das für Sie am meisten Zutreffende an.*

|  | Sehr schlecht | Schlecht | Mittel | Gut | Sehr gut |
| --- | --- | --- | --- | --- | --- |
| Wie nachvollziehbar war die Empfehlung zur Operation für Sie? | *○* | *○* | *○* | *○* | *○* |
| Wie verständlich waren die Informationen, die Sie erhielten? | *○* | *○* | *○* | *○* | *○* |
| Wie fühlten Sie sich insgesamt aufgeklärt? | *○* | *○* | *○* | *○* | *○* |

1. Hätten Sie sich vor der Operation zusätzliche Informationen gewünscht? *Mehrfachnennungen sind möglich.*

*○* Ja, ich wünschte mir mehr Informationen über…

*○* … die Erkrankung

*○* … die Behandlungsmöglichkeiten

*○* … die Vorteile einer Operation

*○* … die Nachteile einer Operation

*○* Andere: _________ ___

*○* Nein, ich wünschte mir keine zusätzlichen Informationen.

1. Haben Sie sich vor der Operation woanders Informationen zu der Diagnose oder Behandlung eingeholt? *Mehrfachnennungen sind möglich.*

*○* Ja, ich habe…

*○* … im Internet recherchiert

*○* … mit Angehörigen/Freunden gesprochen

*○* … bei der Krankenkasse nachgefragt

*○* … medizinisches Fachpersonal (z.B. Arzt, Krankengymnast) befragt

*○* Anderes: _________ __

*○* Nein 🡪 *Weiter mit Frage 16)*

1. FallsSie sich weitere Informationen eingeholt haben, welche Quelle war für Sie die wichtigste?

|  |
| --- |

1. Denken Sie bitte nun nur an die Quelle, die für Sie am wichtigsten war, also über das Gespräch mit Ihrem Arzt, der Ihnen erstmals eine Gebärmutterentfernung empfohlen hat, hinaus. *Bitte kreuzen Sie das für Sie am meisten Zutreffende an.*

|  | Sehr schwer | Schwer | Mittel | Leicht | Sehr leicht |
| --- | --- | --- | --- | --- | --- |
| Wie war es für Sie zusätzliche Informationen aus der anderen Quelle zu erhalten? | *○* | *○* | *○* | *○* | *○* |
| Wie verständlich waren die zusätzlichen Informationen aus der anderen Quelle? | *○* | *○* | *○* | *○* | *○* |

1. Wie vertrauenswürdig fanden Sie die zusätzlichen Informationen aus der anderen Quelle? Berücksichtigen Sie bitte nur die Quelle, die für Sie am wichtigsten war. *Bitte kreuzen Sie das für Sie am meisten Zutreffende an.*

| Nicht vertrauenswürdig | Weniger vertrauenswürdig | Mittel | Eher vertrauenswürdig | Sehr vertrauenswürdig |  |
| --- | --- | --- | --- | --- | --- |
| *○* | *○* | *○* | *○* | *○* |  |

1. Inwiefern haben die zusätzlichen Informationen aus der anderen Quelle zu Ihrer Entscheidung beigetragen? Berücksichtigen Sie bitte nur die Quelle, die für Sie am wichtigsten war. *Bitte kreuzen Sie das für Sie am meisten Zutreffende an.*

| Gar nicht | Wenig | Mittel | Etwas | Sehr stark |  |
| --- | --- | --- | --- | --- | --- |
| *○* | *○* | *○* | *○* | *○* |  |

1. Inwiefern haben Sie die zusätzlichen Informationen aus der anderen Quelle verunsichert?Berücksichtigen Sie bitte nur die Quelle, die für Sie am wichtigsten war. *Bitte kreuzen Sie das für Sie am meisten Zutreffende an.*

| Gar nicht | Wenig | Mittel | Etwas | Sehr stark |  |
| --- | --- | --- | --- | --- | --- |
| *○* | *○* | *○* | *○* | *○* |  |

1. Bitte denken Sie noch einmal intensiv über den gesamten Entscheidungsprozess für die Operation nach. Wie haben Sie den Entscheidungsprozess empfunden? *Bitte kreuzen Sie für jede der Aussagen das für Sie am meisten Zutreffende an.*

|  | Trifft über-haupt nicht zu | Trifft eher nicht zu | Trifft teil-weise zu | Trifft eher zu | Trifft voll-ständig zu |
| --- | --- | --- | --- | --- | --- |
| Ich wusste, welche Wahlmöglichkeiten ich hatte. | *○* | *○* | *○* | *○* | *○* |
| Ich kannte die Vorteile jeder Wahlmöglichkeit. | *○* | *○* | *○* | *○* | *○* |
| Ich kannte die Risiken und Nebenwirkungen jeder Wahlmöglichkeit. | *○* | *○* | *○* | *○* | *○* |
| Ich war mir darüber im Klaren, welche Vorteile für mich am wichtigsten waren. | *○* | *○* | *○* | *○* | *○* |
| Ich war mir darüber im Klaren, welche Risiken und Nebenwirkungen für mich am wichtigsten waren. | *○* | *○* | *○* | *○* | *○* |
| Ich war mir darüber im Klaren, was mir wichtiger war (Vorteile oder Risiken und Nebenwirkungen). | *○* | *○* | *○* | *○* | *○* |
| Ich hatte genug Unterstützung von Anderen, um diese Entscheidung zu treffen. | *○* | *○* | *○* | *○* | *○* |
| Ich traf diese Entscheidung ohne Druck von Anderen. | *○* | *○* | *○* | *○* | *○* |
| Ich hatte genügend Beratung, um diese Entscheidung zu treffen. | *○* | *○* | *○* | *○* | *○* |
| Ich war mir darüber im Klaren, was für mich die beste Wahl war. | *○* | *○* | *○* | *○* | *○* |
| Ich war mir sicher, wofür ich mich entscheiden sollte. | *○* | *○* | *○* | *○* | *○* |
| Diese Entscheidung fiel mir leicht. | *○* | *○* | *○* | *○* | *○* |
| Ich hatte das Gefühl eine informierte Entscheidung getroffen zu haben. | *○* | *○* | *○* | *○* | *○* |
| Meine Entscheidung zeigte, was mir wichtig ist. | *○* | *○* | *○* | *○* | *○* |
| Ich war mit meiner Entscheidung zufrieden. | *○* | *○* | *○* | *○* | *○* |

1. Wir möchten gerne erfahren, wie Sie nun nachträglich über Ihre Entscheidung für die Operation denken. *Bitte kreuzen Sie für jede der Aussagen das für Sie am meisten Zutreffende an.*

|  | Ich stimme überein | Ich stimme eher überein | Weder noch | Ich stimme eher nicht überein | Ich stimme nicht überein |
| --- | --- | --- | --- | --- | --- |
| Es war die richtige Entscheidung. | *○* | *○* | *○* | *○* | *○* |
| Ich bereue die Wahl, die ich getroffen habe. | *○* | *○* | *○* | *○* | *○* |
| Ich würde die gleiche Wahl wieder treffen, wenn ich die Entscheidung erneut treffen müsste. | *○* | *○* | *○* | *○* | *○* |
| Die Wahl hat mir viel Leid bereitet. | *○* | *○* | *○* | *○* | *○* |
| Die Entscheidung war vernünftig. | *○* | *○* | *○* | *○* | *○* |

**Fragen zu einer Zweitmeinung**

*Unter einer Zweitmeinung verstehen wir, dass Sie sich mit einer konkreten medizinischen Fragestellung bei einem weiteren Arzt vorstellen, beispielsweise um eine Diagnose oder einen Behandlungsvorschlag Ihres Arztes abzusichern oder nach Alternativen zu suchen. In Ihrem Fall bedeutet dies, dass Sie sich nach der Empfehlung für die operative Gebärmutterentfernung bei einem anderen Arzt eine Zweitmeinung eingeholt haben, bevor Sie sich der Operation unterzogen haben.*

1. Haben Sie vor der operativen Entfernung der Gebärmutter eine Zweitmeinung in Anspruch genommen?

*○* Ja

*○* Nein 🡪*Weiter mit Frage 24)*

1. Falls Sie eine Zweitmeinung in Anspruch genommen haben, bei wem haben Sie die Zweitmeinung eingeholt? *Bitte kreuzen Sie nur eine Antwort an.*

*○* Arzt in einer Arztpraxis

*○* Arzt im Krankenhaus (gemeint ist nicht das OP Aufklärungsgespräch)

*○* Krankenkasse

*○* Andere: _ _______________

1. Hat der Arzt, bei dem Sie eine Zweitmeinung eingeholt haben, auch die Operation durchgeführt? Bitte beziehen Sie sich nicht auf das OP-Aufklärungsgespräch, sondern nur auf den Fall, dass Sie sich bei diesem Arzt aktiv um eine Zweitmeinung bemüht haben.

*○* Ja

*○* Nein

1. Wurde die Erstmeinung durch die Zweitmeinung bestätigt?

*○* Ja

*○* Teilweise

*○* Nein

1. Inwiefern hat die Zweitmeinung zu Ihrer Entscheidung beigetragen?

*○* Ich war mir nach Einholung der Zweitmeinung sicher, welche Behandlung ich wählen soll.

*○* Ich war mir nach Einholung der Zweitmeinung trotzdem nicht sicher, welche Behandlung ich wählen

soll.

1. Haben Sie sich im Anschluss noch eine dritte Meinung eingeholt?

*○* Ja

*○* Nein

1. Neben einem persönlichen Arzt-Patienten-Kontakt gibt es auch andere Optionen, eine Zweitmeinung einzuholen. Beispielsweise besteht die Möglichkeit, die Befundunterlagen dem Zweitmeiner zuzusenden und eine telefonische oder schriftliche Stellungnahme zu erhalten. Wir würden im Folgenden gerne wissen, welche Optionen zur Einholung einer Zweitmeinung bezüglich der Gebärmutterentfernung für Sie in Frage gekommen sind. *Bitte kreuzen Sie für jede Möglichkeit eine Antwort an.*

|  | Kam nicht in Frage | Kam eher nicht in Frage | Neutral | Kam eher in Frage | Kam in Frage |
| --- | --- | --- | --- | --- | --- |
| Persönliche Beratung vor Ort | *○* | *○* | *○* | *○* | *○* |
| Telefonische Beratung | *○* | *○* | *○* | *○* | *○* |
| Schriftliche Beratung per E-Mail/Post | *○* | *○* | *○* | *○* | *○* |

1. Wenn Sie sich **keine** Zweitmeinung eingeholt haben, welche Gründe gab es dafür? *Bitte kreuzen Sie für jede der Aussagen das für Sie am meisten Zutreffende an. Wenn Sie eine Zweitmeinung eingeholt haben 🡪 weiter mit Frage 26)*

| **Ich habe keine Zweitmeinung eingeholt, weil ich…** | Trifft  überhaupt  nicht zu | Trifft eher nicht zu | Trifft eher zu | Trifft  vollständig  zu |
| --- | --- | --- | --- | --- |
| … mir den Eingriff, unabhängig davon, was ein weiterer Arzt sagt, wünschte. | *○* | *○* | *○* | *○* |
| … den Eingriff als letzte Möglichkeit sah. | *○* | *○* | *○* | *○* |
| … vollstes Vertrauen in meinen Arzt hatte und die Entscheidung in seine Hände legte. | *○* | *○* | *○* | *○* |
| … Angst hatte, dass sich das Verhältnis zu meinem Arzt durch das Einholen einer Zweitmeinung verschlechtert. | *○* | *○* | *○* | *○* |
| … dachte, dass zu viele Meinungen nur zu Verunsicherung führen. | *○* | *○* | *○* | *○* |
| … genügend Informationen hatte und mich dann anhand dieser entschieden habe. | *○* | *○* | *○* | *○* |
| … fand, dass der Aufwand, den ich zur Einholung der Zweitmeinung erbringen musste, zu hoch war. | *○* | *○* | *○* | *○* |
| Andere Gründe gegen die Einholung einer Zweitmeinung: | | | | |

**Fragen zu der Zweitmeinungsrichtlinie**

*Laut einer neuen Richtlinie aus dem Jahr 2019 sollte Sie Ihr Arzt, der die Empfehlung zur Gebärmutterentfernung gegeben hat, darüber informieren, dass Sie sich eine Zweitmeinung einholen können und Ihnen dafür verschiedene Informationen übermitteln. Unter anderem sollte er Sie auf die online verfügbaren Informationsangebote über geeignete Zweitmeiner (eine Liste mit Fachärzten, bei denen Sie eine Zweitmeinung einholen können) hinweisen.*

1. Wir würden gerne wissen, welche Informationen Sie von Ihrem Arzt bezüglich der Einholung einer Zweitmeinung erhalten haben. *Bitte kreuzen Sie für jede der Aussagen das für Sie am meisten Zutreffende an.*

| **Mein Arzt …** | Ja | Nein | Ich weiß  nicht |
| --- | --- | --- | --- |
| … hat mich über das Recht auf eine ärztliche Zweitmeinung aufgeklärt. | *○* | *○* | *○* |
| … hat mich darauf hingewiesen, dass die Zweitmeinung nicht dort eingeholt werden kann, wo der Eingriff durchgeführt werden soll (Sicherung der Unabhängigkeit). | *○* | *○* | *○* |
| … hat mich darauf hingewiesen, wo ich Informationen über geeignete Zweitmeiner finde. | *○* | *○* | *○* |
| … hat mich auf ein Patientenmerkblatt zum Zweitmeinungsverfahren aufmerksam gemacht. | *○* | *○* | *○* |
| … hat mir ein Patientenmerkblatt mitgegeben. | *○* | *○* | *○* |
| … hat mich auf eine Entscheidungshilfe zur Gebärmutterentfernung aufmerksam gemacht. | *○* | *○* | *○* |
| … hat mir deutlich gemacht, dass ich Kopien von Befundunterlagen für die Einholung einer Zweitmeinung mitnehmen kann. | *○* | *○* | *○* |

**Gesundheitsbezogene Daten und soziodemographische Daten**

*Im Folgenden stellen wir Ihnen Fragen zu Ihrer Gesundheit bzw. Ihrem Gesundheitsverhalten sowie einige soziodemographische Fragen. Die Angaben helfen, die Ergebnisse dieser Umfrage zu untersuchen bzw. auszuwerten. Wir möchten Sie hier nochmals darauf hinweisen, dass die Befragung anonym ist, d.h. dass keine Rückschlüsse auf Ihre Person gezogen werden können.*

1. Die folgenden Fragen beziehen sich darauf, wie Sie mit Gesundheitsinformationen umgehen. *Bitte kreuzen Sie für jede der Fragen das für Sie am meisten Zutreffende an.*

| **Wie einfach/ schwierig ist es, …** | Sehr schwierig | Ziemlich schwierig | Ziemlich einfach | Sehr einfach | Weiß nicht |
| --- | --- | --- | --- | --- | --- |
| … Informationen über Unterstützungsmöglich-keiten bei psychischen Problemen, wie Stress oder Depression, zu finden? | *○* | *○* | *○* | *○* | *○* |
| … Informationen über Verhaltensweisen zu finden, die gut für Ihr psychisches Wohlbefinden sind? | *○* | *○* | *○* | *○* | *○* |
| … herauszufinden, wo Sie professionelle Hilfe erhalten, wenn Sie krank sind? | *○* | *○* | *○* | *○* | *○* |
| … Informationen über Krankheitssymptome, die Sie betreffen, zu finden? | *○* | *○* | *○* | *○* | *○* |
| … Informationen in den Medien darüber, wie Sie Ihren Gesundheitszustand verbessern können, zu verstehen? | *○* | *○* | *○* | *○* | *○* |
| … Gesundheitsratschläge von Familien-mitgliedern oder Freunden zu verstehen? | *○* | *○* | *○* | *○* | *○* |
| … zu verstehen, was Ihr Arzt Ihnen sagt? | *○* | *○* | *○* | *○* | *○* |
| … zu verstehen, warum Sie Vorsorgeuntersuchungen brauchen? | *○* | *○* | *○* | *○* | *○* |
| … die Anweisungen Ihres Arztes oder Apothekers zur Einnahme der verschriebenen Medikamente zu verstehen? | *○* | *○* | *○* | *○* | *○* |
| … Gesundheitswarnungen vor Verhaltens-weisen wie Rauchen, wenig Bewegung oder übermäßiges Trinken zu verstehen? | *○* | *○* | *○* | *○* | *○* |
| … zu beurteilen, ob die Informationen über Gesundheitsrisiken in den Medien vertrauenswürdig sind? | *○* | *○* | *○* | *○* | *○* |
| … zu beurteilen, wann Sie eine zweite Meinung von einem anderen Arzt einholen sollten? | *○* | *○* | *○* | *○* | *○* |
| … zu beurteilen, welche Alltagsgewohnheiten mit Ihrer Gesundheit zusammenhängen? | *○* | *○* | *○* | *○* | *○* |
| … aufgrund von Informationen aus den Medien zu entscheiden, wie Sie sich vor Krankheiten schützen können? | *○* | *○* | *○* | *○* | *○* |
| … mit Hilfe der Informationen, die Ihnen der Arzt gibt, Entscheidungen bezüglich Ihrer Krankheit zu treffen? | *○* | *○* | *○* | *○* | *○* |
| … den Anweisungen Ihres Arztes oder Apothekers zu folgen? | *○* | *○* | *○* | *○* | *○* |

1. Die folgenden Aussagen beziehen sich darauf, wie umfangreich Sie von Ihrem Arzt informiert werden und an den Entscheidungen teilhaben möchten. *Bitte kreuzen Sie für jede der Aussagen das für Sie am meisten Zutreffende an.*

|  | Sehr dafür | Etwas dafür | Neutral | Etwas dagegen | Sehr dagegen |
| --- | --- | --- | --- | --- | --- |
| Wichtige medizinische Entscheidungen sollten von Ihrem Arzt/Ihrer Ärztin getroffen werden und nicht von Ihnen. | *○* | *○* | *○* | *○* | *○* |
| Sie sollten sich dem Rat Ihres Arztes/Ihrer Ärztin anschließen, auch wenn Sie anderer Meinung sind. | *○* | *○* | *○* | *○* | *○* |
| Während der Behandlung im Krankenhaus sollten Sie keine Entscheidungen über Ihre eigene Behandlung treffen. | *○* | *○* | *○* | *○* | *○* |
| Sie werden krank und Ihre Erkrankung verschlechtert sich. Möchten Sie, dass Ihr Arzt/Ihre Ärztin Ihre Behandlung in stärkerem Maße in die Hand nimmt? | *○* | *○* | *○* | *○* | *○* |
| Je mehr sich Ihre Erkrankung verschlechtert, umso mehr sollten Sie über Ihre Erkrankung aufgeklärt werden. | *○* | *○* | *○* | *○* | *○* |
| Sie sollten vollständig verstehen, was infolge der Krankheit in Ihrem Körper vor sich geht. | *○* | *○* | *○* | *○* | *○* |
| Auch bei schlechten Untersuchungs-ergebnissen, sollten Sie umfassend informiert werden. | *○* | *○* | *○* | *○* | *○* |
| Ihr Arzt/Ihre Ärztin sollte Ihnen den Zweck der Laboruntersuchungen erklären. | *○* | *○* | *○* | *○* | *○* |
| Es ist wichtig für Sie, alle Nebenwirkungen Ihrer Medikamente zu kennen. | *○* | *○* | *○* | *○* | *○* |
| Informationen über Ihre Krankheit sind für Sie genauso wichtig wie die Behandlung selbst. | *○* | *○* | *○* | *○* | *○* |
| Wenn es mehr als eine Möglichkeit der Behandlung gibt, sollten Sie über alle informiert werden. | *○* | *○* | *○* | *○* | *○* |

| 1. Die Ergebnisse dieser Befragung werden auch für unterschiedliche Altersgruppen ausgewertet. Bitte nennen Sie dazu Monat und Jahr Ihrer Geburt.   Geburtsmonat Geburtsjahr  ☐☐ ☐☐☐☐ |
| --- |
| 1. Welchen Familienstand hatten Sie zur Zeit Ihrer Operation?   *○* Verheiratet/In eingetragener Lebenspartnerschaft (gleichgeschlechtlich), zusammenlebend 🡪 *Weiter mit Frage 32)*  *○* Verheiratet/In eingetragener Lebenspartnerschaft (gleichgeschlechtlich), getrennt lebend  *○* Geschieden/Eingetragene Lebenspartnerschaft aufgehoben (gleichgeschlechtlich)  *○* Verwitwet/Eingetragene/r Lebenspartner/-in verstorben (gleichgeschlechtlich)  *○* Ledig |
| 1. Lebten Sie zur Zeit Ihrer Operation mit einer Person aus Ihrem Haushalt in einer Partnerschaft?   *○* Ja  *○* Nein |
| 1. Welchen höchsten allgemeinbildenden Schulabschluss Sie zur Zeit Ihrer Operation?   *○* Schüler/-in, besuche eine allgemeinbildende Vollzeitschule  *○* Von der Schule abgegangen ohne Schulabschluss  *○* Hauptschulabschluss (Volksschulabschluss) oder gleichwertiger Abschluss  *○* Polytechnische Oberschule der DDR mit Abschluss der 8. oder 9. Klasse  *○* Realschulabschluss (Mittlere Reife) oder gleichwertiger Abschluss  *○* Polytechnische Oberschule der DDR mit Abschluss der 10. Klasse  *○* Fachhochschulreife  *○* Abitur/Allgemeine oder fachgebundene Hochschulreife  *○* Einen anderen Schulabschluss, und zwar: ___________________________________ |
| 1. Was war Ihr höchster beruflicher Ausbildungsstatus zur Zeit Ihrer Operation?   *○*Noch in beruflicher Ausbildung  *○*Ohne beruflichen Ausbildungsabschluss  *○* Abschluss einer beruflichen Ausbildung von mindestens einem Jahr  *○*Hochschulabschluss |
| 1. Für die Einordnung Ihres Wohnortes in eine Kleinstadt/ Mittelstadt/Großstadt würden wir gerne Ihre Postleitzahl zur Zeit Ihrer Operation wissen: ______________ |
| 1. Wie viele Personen lebten zur Zeit Ihrer Operation ständig in Ihrem Haushalt, Sie selbst eingeschlossen?   *○* Nur eine Person 🡪*Machen Sie bitte mit Frage 37) weiter.*  *○* Mehrere Personen, und zwar: ___ ___ |
| 1. Wie viele Personen waren zur Zeit Ihrer Operation in Ihrem Haushalt über 14 Jahre alt? _____ ___ |
| 1. Für die Auswertung nach Gruppen (z.B. niedriges Einkommen, mittleres Einkommen, hohes Einkommen) würden wir gerne wissen: Wie hoch war das durchschnittliche monatliche Nettoeinkommen Ihres Haushalts insgesamt zur Zeit Ihrer Operation?   *(Nehmen Sie die Summe aus Lohn/Gehalt, Einkommen aus selbstständiger Tätigkeit, Rente oder Pension, Einkünfte aus öffentlichen Beihilfen, Einkommen aus Vermietung und Verpachtung, Wohngeld, Kindergeld und sonstige Einkünfte und ziehen Sie dann Steuern und Sozialversicherungsbeiträge ab)*   | *○* 0 – 450 Euro  *○* 451 – 850 Euro  *○* 851 – 1000 Euro  *○* 1001 – 1250 Euro  *○* 1251 – 1500 Euro  *○* 1501 – 1750 Euro  *○* 1751 – 2000 Euro  *○* 2001 – 2250 Euro | *○* 2251 – 2500 Euro  *○* 2501 – 2750 Euro  *○* 2751 – 3000 Euro  *○* 3001 – 3250 Euro  *○* 3251 – 3500 Euro  *○* 3501 – 3750 Euro  *○* 3751 – 4000 Euro  *○* 4001 – 4500 Euro | *○* 4500 – 5000 Euro  *○* 5001 – 5500 Euro  *○* 5501 – 6000 Euro  *○* 6001 – 7500 Euro  *○* 7501 – 10.000 Euro  *○* 10.001 – 20.000 Euro  *○* Mehr als 20.000 Euro  *○* Keine Angabe | | --- | --- | --- | |

*Falls Sie noch Anmerkungen zu unserer Befragung haben oder uns etwas mitteilen möchten, haben Sie hier die Möglichkeit.*

|  |
| --- |

*Wir bedanken uns vielmals für Ihre Unterstützung!*

**Einleitung**

*Sie haben eine operative Entfernung/Teilentfernung der Gaumenmandeln durchführen lassen. Dafür haben Sie vorher von einer Ärztin oder einem Arzt oder auch von mehreren Ärztinnen oder Ärzten eine Empfehlung zur operativen Entfernung/Teilentfernung der Gaumenmandeln erhalten.*

*Wir wollen im Folgenden herausfinden, wie Sie die Entscheidung für diese Operation getroffen haben, also z.B. welche Beratungsangebote Sie in Anspruch genommen haben. Außerdem würden wir gerne erfahren, wie zufrieden Sie mit den Informationen bezüglich einer operativen Entfernung/Teilentfernung der Gaumenmandeln waren und ob Sie möglicherweise eine weitere Ärztin oder einen weiteren Arzt konsultiert haben.*

*Bitte beachten Sie, dass bei personenbezogenen Bezeichnungen aus Gründen der Lesbarkeit nur die männliche Form gewählt wurde. Nichtsdestotrotz beziehen sich die Angaben auf alle Geschlechter.*

**Allgemeines zu Ihrer Operation**

1. Welche Gründe haben zur Empfehlung der operativen Entfernung/ Teilentfernung der Gaumenmandeln geführt? *Mehrfachnennungen sind möglich.*

*○* Wiederkehrende Mandelentzündungen

*○* Vergrößerte Gaumenmandeln

*○* Bösartige Tumore (Krebs)

*○* Andere: _________ ___

*○* Ich weiß nicht

1. Wann wurde die Operation durchgeführt?

Monat Jahr

☐☐ ☐☐☐☐

1. Wer hat die Empfehlung zu Ihrer operativen Entfernung/ Teilentfernung der Gaumenmandeln als erstes ausgesprochen? *Bitte kreuzen Sie nur eine Antwort an*.

*○* Ein Arzt in einer Arztpraxis

*○* Ein Arzt im Krankenhaus (gemeint ist nicht das OP Aufklärungsgespräch)

*○* Andere: _________ ___

**Fragen zu dem Entscheidungsprozess und Informationen über die Operation**

1. Inwiefern hat sich Ihr Gesundheitszustand nach der Entfernung/Teilentfernung der Gaumenmandeln verändert? *Bitte kreuzen Sie das für Sie am meisten Zutreffende an.*

| Starke Verschlechterung | Leichte Verschlechterung | Keine Veränderung | Leichte Verbesserung | Starke Verbesserung |  |
| --- | --- | --- | --- | --- | --- |
| *○* | *○* | *○* | *○* | *○* |  |

1. Denken Sie bitte zurück an die Zeit, in der Sie die Entscheidung für die Operation getroffen haben. Wie empfanden Sie die Entscheidung? *Bitte kreuzen Sie das für Sie am meisten Zutreffende an.*

| Sehr schwierig | Schwierig | Mittel | Leicht | Sehr leicht |  |
| --- | --- | --- | --- | --- | --- |
| *○* | *○* | *○* | *○* | *○* |  |

1. Wie dringlich haben Sie die Entscheidung empfunden? *Bitte kreuzen Sie das für Sie am meisten Zutreffende an.*

| Sehr dringlich | Dringlich | Mittel | Weniger dringlich | Gar nicht dringlich |  |
| --- | --- | --- | --- | --- | --- |
| *○* | *○* | *○* | *○* | *○* |  |

1. Denken Sie bitte zurück an das Gespräch mit Ihrem Arzt, der Ihnen erstmals eine operative Entfernung/ Teilentfernung der Gaumenmandeln empfohlen hat. *Bitte kreuzen Sie das für Sie am meisten Zutreffende an*.

| **Wie fühlten Sie sich aufgeklärt hinsichtlich …** | Sehr schlecht | Schlecht | Mittel | Gut | Sehr gut |
| --- | --- | --- | --- | --- | --- |
| … Ihrer Erkrankung? | *○* | *○* | *○* | *○* | *○* |
| … der Behandlungsalternativen? | *○* | *○* | *○* | *○* | *○* |
| … der Vorteile der Operation? | *○* | *○* | *○* | *○* | *○* |
| … der Risiken und Nebenwirkungen der Operation? | *○* | *○* | *○* | *○* | *○* |

1. Denken Sie bitte zurück an das Gespräch mit Ihrem Arzt, der Ihnen erstmals eine operative Entfernung/ Teilentfernung der Gaumenmandeln empfohlen hat. *Bitte kreuzen Sie das für Sie am meisten Zutreffende an.*

|  | Sehr schlecht | Schlecht | Mittel | Gut | Sehr gut |
| --- | --- | --- | --- | --- | --- |
| Wie nachvollziehbar war die Empfehlung zur Operation für Sie? | *○* | *○* | *○* | *○* | *○* |
| Wie verständlich waren die Informationen, die Sie erhielten? | *○* | *○* | *○* | *○* | *○* |
| Wie fühlten Sie sich insgesamt aufgeklärt? | *○* | *○* | *○* | *○* | *○* |

1. Hätten Sie sich vor der Operation zusätzliche Informationen gewünscht? *Mehrfachnennungen sind möglich.*

*○* Ja, ich wünschte mir mehr Informationen über…

*○* … die Erkrankung

*○* … die Behandlungsmöglichkeiten

*○* … die Vorteile einer Operation

*○* … die Nachteile einer Operation

*○* Andere: _________ ___

*○* Nein, ich wünschte mir keine zusätzlichen Informationen.

1. Haben Sie sich vor der Operation woanders Informationen zu der Diagnose oder Behandlung eingeholt? *Mehrfachnennungen sind möglich.*

*○* Ja, ich habe…

*○* … im Internet recherchiert

*○* … mit Angehörigen/Freunden gesprochen

*○* … bei der Krankenkasse nachgefragt

*○* … medizinisches Fachpersonal (z.B. Arzt, Krankengymnast) befragt

*○* Anderes: _________ __

*○* Nein 🡪 *Weiter mit Frage 16)*

1. FallsSie sich weitere Informationen eingeholt haben, welche Quelle war für Sie die wichtigste?

|  |
| --- |

1. Denken Sie bitte nun nur an die Quelle, die für Sie am wichtigsten war, also über das Gespräch mit Ihrem Arzt, der Ihnen erstmals eine operative Entfernung/ Teilentfernung der Gaumenmandeln empfohlen hat, hinaus. *Bitte kreuzen Sie das für Sie am meisten Zutreffende an.*

|  | Sehr schwer | Schwer | Mittel | Leicht | Sehr leicht |
| --- | --- | --- | --- | --- | --- |
| Wie war es für Sie zusätzliche Informationen aus der anderen Quelle zu erhalten? | *○* | *○* | *○* | *○* | *○* |
| Wie verständlich waren die zusätzlichen Informationen aus der anderen Quelle? | *○* | *○* | *○* | *○* | *○* |

1. Wie vertrauenswürdig fanden Sie die zusätzlichen Informationen aus der anderen Quelle? Berücksichtigen Sie bitte nur die Quelle, die für Sie am wichtigsten war. *Bitte kreuzen Sie das für Sie am meisten Zutreffende an.*

| Nicht vertrauenswürdig | Weniger vertrauenswürdig | Mittel | Eher vertrauenswürdig | Sehr vertrauenswürdig |  |
| --- | --- | --- | --- | --- | --- |
| *○* | *○* | *○* | *○* | *○* |  |

1. Inwiefern haben die zusätzlichen Informationen aus der anderen Quelle zu Ihrer Entscheidung beigetragen? Berücksichtigen Sie bitte nur die Quelle, die für Sie am wichtigsten war. *Bitte kreuzen Sie das für Sie am meisten Zutreffende an.*

| Gar nicht | Wenig | Mittel | Etwas | Sehr stark |  |
| --- | --- | --- | --- | --- | --- |
| *○* | *○* | *○* | *○* | *○* |  |

1. Inwiefern haben Sie die zusätzlichen Informationen aus der anderen Quelle verunsichert?Berücksichtigen Sie bitte nur die Quelle, die für Sie am wichtigsten war. *Bitte kreuzen Sie das für Sie am meisten Zutreffende an.*

| Gar nicht | Wenig | Mittel | Etwas | Sehr stark |  |
| --- | --- | --- | --- | --- | --- |
| *○* | *○* | *○* | *○* | *○* |  |

1. Bitte denken Sie noch einmal intensiv über den gesamten Entscheidungsprozess für die Operation nach. Wie haben Sie den Entscheidungsprozess empfunden? *Bitte kreuzen Sie für jede der Aussagen das für Sie am meisten Zutreffende an.*

|  | Trifft über-haupt nicht zu | Trifft eher nicht zu | Trifft teil-weise zu | Trifft eher zu | Trifft voll-ständig zu |
| --- | --- | --- | --- | --- | --- |
| Ich wusste, welche Wahlmöglichkeiten ich hatte. | *○* | *○* | *○* | *○* | *○* |
| Ich kannte die Vorteile jeder Wahlmöglichkeit. | *○* | *○* | *○* | *○* | *○* |
| Ich kannte die Risiken und Nebenwirkungen jeder Wahlmöglichkeit. | *○* | *○* | *○* | *○* | *○* |
| Ich war mir darüber im Klaren, welche Vorteile für mich am wichtigsten waren. | *○* | *○* | *○* | *○* | *○* |
| Ich war mir darüber im Klaren, welche Risiken und Nebenwirkungen für mich am wichtigsten waren. | *○* | *○* | *○* | *○* | *○* |
| Ich war mir darüber im Klaren, was mir wichtiger war (Vorteile oder Risiken und Nebenwirkungen). | *○* | *○* | *○* | *○* | *○* |
| Ich hatte genug Unterstützung von Anderen, um diese Entscheidung zu treffen. | *○* | *○* | *○* | *○* | *○* |
| Ich traf diese Entscheidung ohne Druck von Anderen. | *○* | *○* | *○* | *○* | *○* |
| Ich hatte genügend Beratung, um diese Entscheidung zu treffen. | *○* | *○* | *○* | *○* | *○* |
| Ich war mir darüber im Klaren, was für mich die beste Wahl war. | *○* | *○* | *○* | *○* | *○* |
| Ich war mir sicher, wofür ich mich entscheiden sollte. | *○* | *○* | *○* | *○* | *○* |
| Diese Entscheidung fiel mir leicht. | *○* | *○* | *○* | *○* | *○* |
| Ich hatte das Gefühl eine informierte Entscheidung getroffen zu haben. | *○* | *○* | *○* | *○* | *○* |
| Meine Entscheidung zeigte, was mir wichtig ist. | *○* | *○* | *○* | *○* | *○* |
| Ich war mit meiner Entscheidung zufrieden. | *○* | *○* | *○* | *○* | *○* |

1. Wir möchten gerne erfahren, wie Sie nun nachträglich über Ihre Entscheidung für die Operation denken. *Bitte kreuzen Sie für jede der Aussagen das für Sie am meisten Zutreffende an.*

|  | Ich stimme überein | Ich stimme eher überein | Weder noch | Ich stimme eher nicht überein | Ich stimme nicht überein |
| --- | --- | --- | --- | --- | --- |
| Es war die richtige Entscheidung. | *○* | *○* | *○* | *○* | *○* |
| Ich bereue die Wahl, die ich getroffen habe. | *○* | *○* | *○* | *○* | *○* |
| Ich würde die gleiche Wahl wieder treffen, wenn ich die Entscheidung erneut treffen müsste. | *○* | *○* | *○* | *○* | *○* |
| Die Wahl hat mir viel Leid bereitet. | *○* | *○* | *○* | *○* | *○* |
| Die Entscheidung war vernünftig. | *○* | *○* | *○* | *○* | *○* |

**Fragen zu einer Zweitmeinung**

*Unter einer Zweitmeinung verstehen wir, dass Sie sich mit einer konkreten medizinischen Fragestellung bei einem weiteren Arzt vorstellen, beispielsweise um eine Diagnose oder einen Behandlungsvorschlag Ihres Arztes abzusichern oder nach Alternativen zu suchen. In Ihrem Fall bedeutet dies, dass Sie sich nach der Empfehlung für die operative Entfernung/ Teilentfernung der Gaumenmandeln bei einem anderen Arzt eine Zweitmeinung eingeholt haben, bevor Sie sich der Operation unterzogen haben.*

1. Haben Sie vor der operativen Entfernung/ Teilentfernung der Gaumenmandeln eine Zweitmeinung in Anspruch genommen?

*○* Ja

*○* Nein 🡪*Weiter mit Frage 24)*

1. Falls Sie eine Zweitmeinung in Anspruch genommen haben, bei wem haben Sie die Zweitmeinung eingeholt? *Bitte kreuzen Sie nur eine Antwort an.*

*○* Arzt in einer Arztpraxis

*○* Arzt im Krankenhaus (gemeint ist nicht das OP Aufklärungsgespräch)

*○* Krankenkasse

*○* Andere: _ _______________

1. Hat der Arzt, bei dem Sie eine Zweitmeinung eingeholt haben, auch die Operation durchgeführt? Bitte beziehen Sie sich nicht auf das OP-Aufklärungsgespräch, sondern nur auf den Fall, dass Sie sich bei diesem Arzt aktiv um eine Zweitmeinung bemüht haben.

*○* Ja

*○* Nein

1. Wurde die Erstmeinung durch die Zweitmeinung bestätigt?

*○* Ja

*○* Teilweise

*○* Nein

1. Inwiefern hat die Zweitmeinung zu Ihrer Entscheidung beigetragen?

*○* Ich war mir nach Einholung der Zweitmeinung sicher, welche Behandlung ich wählen soll.

*○* Ich war mir nach Einholung der Zweitmeinung trotzdem nicht sicher, welche Behandlung ich wählen

soll.

1. Haben Sie sich im Anschluss noch eine dritte Meinung eingeholt?

*○* Ja

*○* Nein

1. Neben einem persönlichen Arzt-Patienten-Kontakt gibt es auch andere Optionen, eine Zweitmeinung einzuholen. Beispielsweise besteht die Möglichkeit, die Befundunterlagen dem Zweitmeiner zuzusenden und eine telefonische oder schriftliche Stellungnahme zu erhalten. Wir würden im Folgenden gerne wissen, welche Optionen zur Einholung einer Zweitmeinung bezüglich der Entfernung/ Teilentfernung der Gaumenmandeln für Sie in Frage gekommen sind. *Bitte kreuzen Sie für jede Möglichkeit eine Antwort an.*

|  | Kam nicht in Frage | Kam eher nicht in Frage | Neutral | Kam eher in Frage | Kam in Frage |
| --- | --- | --- | --- | --- | --- |
| Persönliche Beratung vor Ort | *○* | *○* | *○* | *○* | *○* |
| Telefonische Beratung | *○* | *○* | *○* | *○* | *○* |
| Schriftliche Beratung per E-Mail/Post | *○* | *○* | *○* | *○* | *○* |

1. Wenn Sie sich **keine** Zweitmeinung eingeholt haben, welche Gründe gab es dafür? *Bitte kreuzen Sie für jede der Aussagen das für Sie am meisten Zutreffende an. Wenn Sie eine Zweitmeinung eingeholt haben 🡪 weiter mit Frage 26)*

| **Ich habe keine Zweitmeinung eingeholt, weil ich …** | Trifft  überhaupt  nicht zu | Trifft eher nicht zu | Trifft eher zu | Trifft  vollständig  zu |
| --- | --- | --- | --- | --- |
| … mir den Eingriff, unabhängig davon, was ein weiterer Arzt sagt, wünschte. | *○* | *○* | *○* | *○* |
| … den Eingriff als letzte Möglichkeit sah. | *○* | *○* | *○* | *○* |
| … vollstes Vertrauen in meinen Arzt hatte und die Entscheidung in seine Hände legte. | *○* | *○* | *○* | *○* |
| … Angst hatte, dass sich das Verhältnis zu meinem Arzt durch das Einholen einer Zweitmeinung verschlechtert. | *○* | *○* | *○* | *○* |
| … dachte, dass zu viele Meinungen nur zu Verunsicherung führen. | *○* | *○* | *○* | *○* |
| … genügend Informationen hatte und mich dann anhand dieser entschieden habe. | *○* | *○* | *○* | *○* |
| … fand, dass der Aufwand, den ich zur Einholung der Zweitmeinung erbringen musste, zu hoch war. | *○* | *○* | *○* | *○* |
| Andere Gründe gegen die Einholung einer Zweitmeinung: | | | | |

**Gesundheitsbezogene Daten und soziodemographische Daten**

*Im Folgenden stellen wir Ihnen Fragen zu Ihrer Gesundheit bzw. Ihrem Gesundheitsverhalten sowie einige soziodemographische Fragen. Die Angaben helfen, die Ergebnisse dieser Umfrage zu untersuchen bzw. auszuwerten. Wir möchten Sie hier nochmals darauf hinweisen, dass die Befragung anonym ist, d.h. dass keine Rückschlüsse auf Ihre Person gezogen werden können.*

1. Die folgenden Fragen beziehen sich darauf, wie Sie mit Gesundheitsinformationen umgehen. *Bitte kreuzen Sie für jede der Fragen das für Sie am meisten Zutreffende an.*

| **Wie einfach/ schwierig ist es, …** | Sehr schwierig | Ziemlich schwierig | Ziemlich einfach | Sehr einfach | Weiß nicht |
| --- | --- | --- | --- | --- | --- |
| … Informationen über Unterstützungsmöglich-keiten bei psychischen Problemen, wie Stress oder Depression, zu finden? | *○* | *○* | *○* | *○* | *○* |
| … Informationen über Verhaltensweisen zu finden, die gut für Ihr psychisches Wohlbefinden sind? | *○* | *○* | *○* | *○* | *○* |
| … herauszufinden, wo Sie professionelle Hilfe erhalten, wenn Sie krank sind? | *○* | *○* | *○* | *○* | *○* |
| … Informationen über Krankheitssymptome, die Sie betreffen, zu finden? | *○* | *○* | *○* | *○* | *○* |
| … Informationen in den Medien darüber, wie Sie Ihren Gesundheitszustand verbessern können, zu verstehen? | *○* | *○* | *○* | *○* | *○* |
| … Gesundheitsratschläge von Familien-mitgliedern oder Freunden zu verstehen? | *○* | *○* | *○* | *○* | *○* |
| … zu verstehen, was Ihr Arzt Ihnen sagt? | *○* | *○* | *○* | *○* | *○* |
| … zu verstehen, warum Sie Vorsorgeuntersuchungen brauchen? | *○* | *○* | *○* | *○* | *○* |
| … die Anweisungen Ihres Arztes oder Apothekers zur Einnahme der verschriebenen Medikamente zu verstehen? | *○* | *○* | *○* | *○* | *○* |
| … Gesundheitswarnungen vor Verhaltens-weisen wie Rauchen, wenig Bewegung oder übermäßiges Trinken zu verstehen? | *○* | *○* | *○* | *○* | *○* |
| … zu beurteilen, ob die Informationen über Gesundheitsrisiken in den Medien vertrauenswürdig sind? | *○* | *○* | *○* | *○* | *○* |
| … zu beurteilen, wann Sie eine zweite Meinung von einem anderen Arzt einholen sollten? | *○* | *○* | *○* | *○* | *○* |
| … zu beurteilen, welche Alltagsgewohnheiten mit Ihrer Gesundheit zusammenhängen? | *○* | *○* | *○* | *○* | *○* |
| … aufgrund von Informationen aus den Medien zu entscheiden, wie Sie sich vor Krankheiten schützen können? | *○* | *○* | *○* | *○* | *○* |
| … mit Hilfe der Informationen, die Ihnen der Arzt gibt, Entscheidungen bezüglich Ihrer Krankheit zu treffen? | *○* | *○* | *○* | *○* | *○* |
| … den Anweisungen Ihres Arztes oder Apothekers zu folgen? | *○* | *○* | *○* | *○* | *○* |

1. Die folgenden Aussagen beziehen sich darauf, wie umfangreich Sie von Ihrem Arzt informiert werden und an den Entscheidungen teilhaben möchten. *Bitte kreuzen Sie für jede der Aussagen das für Sie am meisten Zutreffende an.*

|  | Sehr dafür | Etwas dafür | Neutral | Etwas dagegen | Sehr dagegen |
| --- | --- | --- | --- | --- | --- |
| Wichtige medizinische Entscheidungen sollten von Ihrem Arzt/Ihrer Ärztin getroffen werden und nicht von Ihnen. | *○* | *○* | *○* | *○* | *○* |
| Sie sollten sich dem Rat Ihres Arztes/Ihrer Ärztin anschließen, auch wenn Sie anderer Meinung sind. | *○* | *○* | *○* | *○* | *○* |
| Während der Behandlung im Krankenhaus sollten Sie keine Entscheidungen über Ihre eigene Behandlung treffen. | *○* | *○* | *○* | *○* | *○* |
| Sie werden krank und Ihre Erkrankung verschlechtert sich. Möchten Sie, dass Ihr Arzt/Ihre Ärztin Ihre Behandlung in stärkerem Maße in die Hand nimmt? | *○* | *○* | *○* | *○* | *○* |
| Je mehr sich Ihre Erkrankung verschlechtert, umso mehr sollten Sie über Ihre Erkrankung aufgeklärt werden. | *○* | *○* | *○* | *○* | *○* |
| Sie sollten vollständig verstehen, was infolge der Krankheit in Ihrem Körper vor sich geht. | *○* | *○* | *○* | *○* | *○* |
| Auch bei schlechten Untersuchungs-ergebnissen, sollten Sie umfassend informiert werden. | *○* | *○* | *○* | *○* | *○* |
| Ihr Arzt/Ihre Ärztin sollte Ihnen den Zweck der Laboruntersuchungen erklären. | *○* | *○* | *○* | *○* | *○* |
| Es ist wichtig für Sie, alle Nebenwirkungen Ihrer Medikamente zu kennen. | *○* | *○* | *○* | *○* | *○* |
| Informationen über Ihre Krankheit sind für Sie genauso wichtig wie die Behandlung selbst. | *○* | *○* | *○* | *○* | *○* |
| Wenn es mehr als eine Möglichkeit der Behandlung gibt, sollten Sie über alle informiert werden. | *○* | *○* | *○* | *○* | *○* |

| 1. Welches Geschlecht haben Sie?   *○* Männlich  *○* Weiblich  *○* Divers |
| --- |
| 1. Die Ergebnisse dieser Befragung werden auch für unterschiedliche Altersgruppen ausgewertet. Bitte nennen Sie dazu Monat und Jahr Ihrer Geburt.   Geburtsmonat Geburtsjahr  ☐☐ ☐☐☐☐ |
| 1. Welchen Familienstand hatten Sie zur Zeit Ihrer Operation?   *○* Verheiratet/In eingetragener Lebenspartnerschaft (gleichgeschlechtlich), zusammenlebend 🡪 *Weiter mit Frage 32)*  *○* Verheiratet/In eingetragener Lebenspartnerschaft (gleichgeschlechtlich), getrennt lebend  *○* Geschieden/Eingetragene Lebenspartnerschaft aufgehoben (gleichgeschlechtlich)  *○* Verwitwet/Eingetragene/r Lebenspartner/-in verstorben (gleichgeschlechtlich)  *○* Ledig |
| 1. Lebten Sie zur Zeit Ihrer Operation mit einer Person aus Ihrem Haushalt in einer Partnerschaft?   *○* Ja  *○* Nein |
| 1. Welchen höchsten allgemeinbildenden Schulabschluss Sie zur Zeit Ihrer Operation?   *○* Schüler/-in, besuche eine allgemeinbildende Vollzeitschule  *○* Von der Schule abgegangen ohne Schulabschluss  *○* Hauptschulabschluss (Volksschulabschluss) oder gleichwertiger Abschluss  *○* Polytechnische Oberschule der DDR mit Abschluss der 8. oder 9. Klasse  *○* Realschulabschluss (Mittlere Reife) oder gleichwertiger Abschluss  *○* Polytechnische Oberschule der DDR mit Abschluss der 10. Klasse  *○* Fachhochschulreife  *○* Abitur/Allgemeine oder fachgebundene Hochschulreife  *○* Einen anderen Schulabschluss, und zwar: ___________________________________ |
| 1. Was war Ihr höchster beruflicher Ausbildungsstatus zur Zeit Ihrer Operation?   *○*Noch in beruflicher Ausbildung  *○*Ohne beruflichen Ausbildungsabschluss  *○* Abschluss einer beruflichen Ausbildung von mindestens einem Jahr  *○*Hochschulabschluss |
| 1. Für die Einordnung Ihres Wohnortes in eine Kleinstadt/ Mittelstadt/Großstadt würden wir gerne Ihre Postleitzahl zur Zeit Ihrer Operation wissen: ______________ |
| 1. Wie viele Personen lebten zur Zeit Ihrer Operation ständig in Ihrem Haushalt, Sie selbst eingeschlossen?   *○* Nur eine Person 🡪*Weiter mit Frage 37)*  *○* Mehrere Personen, und zwar: ___ ___ |
| 1. Wie viele Personen waren zur Zeit Ihrer Operation in Ihrem Haushalt über 14 Jahre alt? ______ __ |
| 1. Für die Auswertung nach Gruppen (z.B. niedriges Einkommen, mittleres Einkommen, hohes Einkommen) würden wir gerne wissen: Wie hoch war das durchschnittliche monatliche Nettoeinkommen Ihres Haushalts insgesamt zur Zeit Ihrer Operation?   *(Nehmen Sie die Summe aus Lohn/Gehalt, Einkommen aus selbstständiger Tätigkeit, Rente oder Pension, Einkünfte aus öffentlichen Beihilfen, Einkommen aus Vermietung und Verpachtung, Wohngeld, Kindergeld und sonstige Einkünfte und ziehen Sie dann Steuern und Sozialversicherungsbeiträge ab)*   | *○* 0 – 450 Euro  *○* 451 – 850 Euro  *○* 851 – 1000 Euro  *○* 1001 – 1250 Euro  *○* 1251 – 1500 Euro  *○* 1501 – 1750 Euro  *○* 1751 – 2000 Euro  *○* 2001 – 2250 Euro | *○* 2251 – 2500 Euro  *○* 2501 – 2750 Euro  *○* 2751 – 3000 Euro  *○* 3001 – 3250 Euro  *○* 3251 – 3500 Euro  *○* 3501 – 3750 Euro  *○* 3751 – 4000 Euro  *○* 4001 – 4500 Euro | *○* 4500 – 5000 Euro  *○* 5001 – 5500 Euro  *○* 5501 – 6000 Euro  *○* 6001 – 7500 Euro  *○* 7501 – 10.000 Euro  *○* 10.001 – 20.000 Euro  *○* Mehr als 20.000 Euro  *○* Keine Angabe | | --- | --- | --- | |

*Falls Sie noch Anmerkungen zu unserer Befragung haben oder uns etwas mitteilen möchten, haben Sie hier die Möglichkeit.*

|  |
| --- |

*Wir bedanken uns vielmals für Ihre Unterstützung!*

**Einleitung**

*Sie haben eine operative Entfernung/Teilentfernung der Gaumenmandeln durchführen lassen. Dafür haben Sie vorher von einer Ärztin oder einem Arzt oder auch von mehreren Ärztinnen oder Ärzten eine Empfehlung zur operativen Entfernung/Teilentfernung der Gaumenmandeln erhalten.*

*Wir wollen im Folgenden herausfinden, wie Sie die Entscheidung für diese Operation getroffen haben, also z.B. welche Beratungsangebote Sie in Anspruch genommen haben. Außerdem würden wir gerne erfahren, wie zufrieden Sie mit den Informationen bezüglich einer operativen Entfernung/Teilentfernung der Gaumenmandeln waren und ob Sie möglicherweise eine weitere Ärztin oder einen weiteren Arzt konsultiert haben.*

*Bitte beachten Sie, dass bei personenbezogenen Bezeichnungen aus Gründen der Lesbarkeit nur die männliche Form gewählt wurde. Nichtsdestotrotz beziehen sich die Angaben auf alle Geschlechter.*

**Allgemeines zu Ihrer Operation**

1. Welche Gründe haben zur Empfehlung der operativen Entfernung/ Teilentfernung der Gaumenmandeln geführt? *Mehrfachnennungen sind möglich.*

*○* Wiederkehrende Mandelentzündungen

*○* Vergrößerte Gaumenmandeln

*○* Bösartige Tumore (Krebs)

*○* Andere: _________ ___

*○* Ich weiß nicht

1. Wann wurde die Operation durchgeführt?

Monat Jahr

☐☐ ☐☐☐☐

1. Wer hat die Empfehlung zu Ihrer operativen Entfernung/ Teilentfernung der Gaumenmandeln als erstes ausgesprochen? *Bitte kreuzen Sie nur eine Antwort an*.

*○* Ein Arzt in einer Arztpraxis

*○* Ein Arzt im Krankenhaus (gemeint ist nicht das OP Aufklärungsgespräch)

*○* Andere: _________ ___

**Fragen zu dem Entscheidungsprozess und Informationen über die Operation**

1. Inwiefern hat sich Ihr Gesundheitszustand nach der Entfernung/Teilentfernung der Gaumenmandeln verändert? *Bitte kreuzen Sie das für Sie am meisten Zutreffende an.*

| Starke Verschlechterung | Leichte Verschlechterung | Keine Veränderung | Leichte Verbesserung | Starke Verbesserung |  |
| --- | --- | --- | --- | --- | --- |
| *○* | *○* | *○* | *○* | *○* |  |

1. Denken Sie bitte zurück an die Zeit, in der Sie die Entscheidung für die Operation getroffen haben. Wie empfanden Sie die Entscheidung? *Bitte kreuzen Sie das für Sie am meisten Zutreffende an.*

| Sehr schwierig | Schwierig | Mittel | Leicht | Sehr leicht |  |
| --- | --- | --- | --- | --- | --- |
| *○* | *○* | *○* | *○* | *○* |  |

1. Wie dringlich haben Sie die Entscheidung empfunden? *Bitte kreuzen Sie das für Sie am meisten Zutreffende an.*

| Sehr dringlich | Dringlich | Mittel | Weniger dringlich | Gar nicht dringlich |  |
| --- | --- | --- | --- | --- | --- |
| *○* | *○* | *○* | *○* | *○* |  |

1. Denken Sie bitte zurück an das Gespräch mit Ihrem Arzt, der Ihnen erstmals eine operative Entfernung/ Teilentfernung der Gaumenmandeln empfohlen hat. *Bitte kreuzen Sie das für Sie am meisten Zutreffende an*.

| **Wie fühlten Sie sich aufgeklärt hinsichtlich …** | Sehr schlecht | Schlecht | Mittel | Gut | Sehr gut |
| --- | --- | --- | --- | --- | --- |
| … Ihrer Erkrankung? | *○* | *○* | *○* | *○* | *○* |
| … der Behandlungsalternativen? | *○* | *○* | *○* | *○* | *○* |
| … der Vorteile der Operation? | *○* | *○* | *○* | *○* | *○* |
| … der Risiken und Nebenwirkungen der Operation? | *○* | *○* | *○* | *○* | *○* |

1. Denken Sie bitte zurück an das Gespräch mit Ihrem Arzt, der Ihnen erstmals eine operative Entfernung/ Teilentfernung der Gaumenmandeln empfohlen hat. *Bitte kreuzen Sie das für Sie am meisten Zutreffende an.*

|  | Sehr schlecht | Schlecht | Mittel | Gut | Sehr gut |
| --- | --- | --- | --- | --- | --- |
| Wie nachvollziehbar war die Empfehlung zur Operation für Sie? | *○* | *○* | *○* | *○* | *○* |
| Wie verständlich waren die Informationen, die Sie erhielten? | *○* | *○* | *○* | *○* | *○* |
| Wie fühlten Sie sich insgesamt aufgeklärt? | *○* | *○* | *○* | *○* | *○* |

1. Hätten Sie sich vor der Operation zusätzliche Informationen gewünscht? *Mehrfachnennungen sind möglich.*

*○* Ja, ich wünschte mir mehr Informationen über…

*○* … die Erkrankung

*○* … die Behandlungsmöglichkeiten

*○* … die Vorteile einer Operation

*○* … die Nachteile einer Operation

*○* Andere: _________ ___

*○* Nein, ich wünschte mir keine zusätzlichen Informationen.

1. Haben Sie sich vor der Operation woanders Informationen zu der Diagnose oder Behandlung eingeholt? *Mehrfachnennungen sind möglich.*

*○* Ja, ich habe…

*○* … im Internet recherchiert

*○* … mit Angehörigen/Freunden gesprochen

*○* … bei der Krankenkasse nachgefragt

*○* … medizinisches Fachpersonal (z.B. Arzt, Krankengymnast) befragt

*○* Anderes: _________ __

*○* Nein 🡪 *Weiter mit Frage 16)*

1. FallsSie sich weitere Informationen eingeholt haben, welche Quelle war für Sie die wichtigste?

|  |
| --- |

1. Denken Sie bitte nun nur an die Quelle, die für Sie am wichtigsten war, also über das Gespräch mit Ihrem Arzt, der Ihnen erstmals eine operative Entfernung/ Teilentfernung der Gaumenmandeln empfohlen hat, hinaus. *Bitte kreuzen Sie das für Sie am meisten Zutreffende an.*

|  | Sehr schwer | Schwer | Mittel | Leicht | Sehr leicht |
| --- | --- | --- | --- | --- | --- |
| Wie war es für Sie zusätzliche Informationen aus der anderen Quelle zu erhalten? | *○* | *○* | *○* | *○* | *○* |
| Wie verständlich waren die zusätzlichen Informationen aus der anderen Quelle? | *○* | *○* | *○* | *○* | *○* |

1. Wie vertrauenswürdig fanden Sie die zusätzlichen Informationen aus der anderen Quelle? Berücksichtigen Sie bitte nur die Quelle, die für Sie am wichtigsten war. *Bitte kreuzen Sie das für Sie am meisten Zutreffende an.*

| Nicht vertrauenswürdig | Weniger vertrauenswürdig | Mittel | Eher vertrauenswürdig | Sehr vertrauenswürdig |  |
| --- | --- | --- | --- | --- | --- |
| *○* | *○* | *○* | *○* | *○* |  |

1. Inwiefern haben die zusätzlichen Informationen aus der anderen Quelle zu Ihrer Entscheidung beigetragen? Berücksichtigen Sie bitte nur die Quelle, die für Sie am wichtigsten war. *Bitte kreuzen Sie das für Sie am meisten Zutreffende an.*

| Gar nicht | Wenig | Mittel | Etwas | Sehr stark |  |
| --- | --- | --- | --- | --- | --- |
| *○* | *○* | *○* | *○* | *○* |  |

1. Inwiefern haben Sie die zusätzlichen Informationen aus der anderen Quelle verunsichert?Berücksichtigen Sie bitte nur die Quelle, die für Sie am wichtigsten war. *Bitte kreuzen Sie das für Sie am meisten Zutreffende an.*

| Gar nicht | Wenig | Mittel | Etwas | Sehr stark |  |
| --- | --- | --- | --- | --- | --- |
| *○* | *○* | *○* | *○* | *○* |  |

1. Bitte denken Sie noch einmal intensiv über den gesamten Entscheidungsprozess für die Operation nach. Wie haben Sie den Entscheidungsprozess empfunden? *Bitte kreuzen Sie für jede der Aussagen das für Sie am meisten Zutreffende an.*

|  | Trifft über-haupt nicht zu | Trifft eher nicht zu | Trifft teil-weise zu | Trifft eher zu | Trifft voll-ständig zu |
| --- | --- | --- | --- | --- | --- |
| Ich wusste, welche Wahlmöglichkeiten ich hatte. | *○* | *○* | *○* | *○* | *○* |
| Ich kannte die Vorteile jeder Wahlmöglichkeit. | *○* | *○* | *○* | *○* | *○* |
| Ich kannte die Risiken und Nebenwirkungen jeder Wahlmöglichkeit. | *○* | *○* | *○* | *○* | *○* |
| Ich war mir darüber im Klaren, welche Vorteile für mich am wichtigsten waren. | *○* | *○* | *○* | *○* | *○* |
| Ich war mir darüber im Klaren, welche Risiken und Nebenwirkungen für mich am wichtigsten waren. | *○* | *○* | *○* | *○* | *○* |
| Ich war mir darüber im Klaren, was mir wichtiger war (Vorteile oder Risiken und Nebenwirkungen). | *○* | *○* | *○* | *○* | *○* |
| Ich hatte genug Unterstützung von Anderen, um diese Entscheidung zu treffen. | *○* | *○* | *○* | *○* | *○* |
| Ich traf diese Entscheidung ohne Druck von Anderen. | *○* | *○* | *○* | *○* | *○* |
| Ich hatte genügend Beratung, um diese Entscheidung zu treffen. | *○* | *○* | *○* | *○* | *○* |
| Ich war mir darüber im Klaren, was für mich die beste Wahl war. | *○* | *○* | *○* | *○* | *○* |
| Ich war mir sicher, wofür ich mich entscheiden sollte. | *○* | *○* | *○* | *○* | *○* |
| Diese Entscheidung fiel mir leicht. | *○* | *○* | *○* | *○* | *○* |
| Ich hatte das Gefühl eine informierte Entscheidung getroffen zu haben. | *○* | *○* | *○* | *○* | *○* |
| Meine Entscheidung zeigte, was mir wichtig ist. | *○* | *○* | *○* | *○* | *○* |
| Ich war mit meiner Entscheidung zufrieden. | *○* | *○* | *○* | *○* | *○* |

1. Wir möchten gerne erfahren, wie Sie nun nachträglich über Ihre Entscheidung für die Operation denken. *Bitte kreuzen Sie für jede der Aussagen das für Sie am meisten Zutreffende an.*

|  | Ich stimme überein | Ich stimme eher überein | Weder noch | Ich stimme eher nicht überein | Ich stimme nicht überein |
| --- | --- | --- | --- | --- | --- |
| Es war die richtige Entscheidung. | *○* | *○* | *○* | *○* | *○* |
| Ich bereue die Wahl, die ich getroffen habe. | *○* | *○* | *○* | *○* | *○* |
| Ich würde die gleiche Wahl wieder treffen, wenn ich die Entscheidung erneut treffen müsste. | *○* | *○* | *○* | *○* | *○* |
| Die Wahl hat mir viel Leid bereitet. | *○* | *○* | *○* | *○* | *○* |
| Die Entscheidung war vernünftig. | *○* | *○* | *○* | *○* | *○* |

**Fragen zu einer Zweitmeinung**

*Unter einer Zweitmeinung verstehen wir, dass Sie sich mit einer konkreten medizinischen Fragestellung bei einem weiteren Arzt vorstellen, beispielsweise um eine Diagnose oder einen Behandlungsvorschlag Ihres Arztes abzusichern oder nach Alternativen zu suchen. In Ihrem Fall bedeutet dies, dass Sie sich nach der Empfehlung für die operative Entfernung/ Teilentfernung der Gaumenmandeln bei einem anderen Arzt eine Zweitmeinung eingeholt haben, bevor Sie sich der Operation unterzogen haben.*

1. Haben Sie vor der operativen Entfernung/ Teilentfernung der Gaumenmandeln eine Zweitmeinung in Anspruch genommen?

*○* Ja

*○* Nein 🡪*Weiter mit Frage 24)*

1. Falls Sie eine Zweitmeinung in Anspruch genommen haben, bei wem haben Sie die Zweitmeinung eingeholt? *Bitte kreuzen Sie nur eine Antwort an.*

*○* Arzt in einer Arztpraxis

*○* Arzt im Krankenhaus (gemeint ist nicht das OP Aufklärungsgespräch)

*○* Krankenkasse

*○* Andere: _ _______________

1. Hat der Arzt, bei dem Sie eine Zweitmeinung eingeholt haben, auch die Operation durchgeführt? Bitte beziehen Sie sich nicht auf das OP-Aufklärungsgespräch, sondern nur auf den Fall, dass Sie sich bei diesem Arzt aktiv um eine Zweitmeinung bemüht haben.

*○* Ja

*○* Nein

1. Wurde die Erstmeinung durch die Zweitmeinung bestätigt?

*○* Ja

*○* Teilweise

*○* Nein

1. Inwiefern hat die Zweitmeinung zu Ihrer Entscheidung beigetragen?

*○* Ich war mir nach Einholung der Zweitmeinung sicher, welche Behandlung ich wählen soll.

*○* Ich war mir nach Einholung der Zweitmeinung trotzdem nicht sicher, welche Behandlung ich wählen

soll.

1. Haben Sie sich im Anschluss noch eine dritte Meinung eingeholt?

*○* Ja

*○* Nein

1. Neben einem persönlichen Arzt-Patienten-Kontakt gibt es auch andere Optionen, eine Zweitmeinung einzuholen. Beispielsweise besteht die Möglichkeit, die Befundunterlagen dem Zweitmeiner zuzusenden und eine telefonische oder schriftliche Stellungnahme zu erhalten. Wir würden im Folgenden gerne wissen, welche Optionen zur Einholung einer Zweitmeinung bezüglich der Entfernung/ Teilentfernung der Gaumenmandeln für Sie in Frage gekommen sind. *Bitte kreuzen Sie für jede Möglichkeit eine Antwort an.*

|  | Kam nicht in Frage | Kam eher nicht in Frage | Neutral | Kam eher in Frage | Kam in Frage |
| --- | --- | --- | --- | --- | --- |
| Persönliche Beratung vor Ort | *○* | *○* | *○* | *○* | *○* |
| Telefonische Beratung | *○* | *○* | *○* | *○* | *○* |
| Schriftliche Beratung per E-Mail/Post | *○* | *○* | *○* | *○* | *○* |

1. Wenn Sie sich **keine** Zweitmeinung eingeholt haben, welche Gründe gab es dafür? *Bitte kreuzen Sie für jede der Aussagen das für Sie am meisten Zutreffende an. Wenn Sie eine Zweitmeinung eingeholt haben 🡪 weiter mit Frage 26)*

| **Ich habe keine Zweitmeinung eingeholt, weil ich …** | Trifft  überhaupt  nicht zu | Trifft eher nicht zu | Trifft eher zu | Trifft  vollständig  zu |
| --- | --- | --- | --- | --- |
| … mir den Eingriff, unabhängig davon, was ein weiterer Arzt sagt, wünschte. | *○* | *○* | *○* | *○* |
| … den Eingriff als letzte Möglichkeit sah. | *○* | *○* | *○* | *○* |
| … vollstes Vertrauen in meinen Arzt hatte und die Entscheidung in seine Hände legte. | *○* | *○* | *○* | *○* |
| … Angst hatte, dass sich das Verhältnis zu meinem Arzt durch das Einholen einer Zweitmeinung verschlechtert. | *○* | *○* | *○* | *○* |
| … dachte, dass zu viele Meinungen nur zu Verunsicherung führen. | *○* | *○* | *○* | *○* |
| … genügend Informationen hatte und mich dann anhand dieser entschieden habe. | *○* | *○* | *○* | *○* |
| … fand, dass der Aufwand, den ich zur Einholung der Zweitmeinung erbringen musste, zu hoch war. | *○* | *○* | *○* | *○* |
| Andere Gründe gegen die Einholung einer Zweitmeinung: | | | | |

**Fragen zu der Zweitmeinungsrichtlinie**

*Laut einer neuen Richtlinie aus dem Jahr 2019 sollte Sie Ihr Arzt, der Ihnen die Empfehlung zur operativen Entfernung/Teilentfernung der Gaumenmandeln gegeben hat, darüber informieren, dass Sie sich eine Zweitmeinung einholen können und Ihnen dafür verschiedene Informationen übermitteln. Unter anderem sollte er Sie auf die online verfügbaren Informationsangebote über geeignete Zweitmeiner (eine Liste mit Fachärzten, bei denen Sie eine Zweitmeinung einholen können) hinweisen.*

1. Wir würden gerne wissen, welche Informationen Sie von Ihrem Arzt bezüglich der Einholung einer Zweitmeinung erhalten haben. *Bitte kreuzen Sie für jede der Aussagen das für Sie am meisten Zutreffende an.*

| **Mein Arzt …** | Ja | Nein | Ich weiß  nicht |
| --- | --- | --- | --- |
| … hat mich über das Recht auf eine ärztliche Zweitmeinung aufgeklärt. | *○* | *○* | *○* |
| … hat mich darauf hingewiesen, dass die Zweitmeinung nicht dort eingeholt werden kann, wo der Eingriff durchgeführt werden soll (Sicherung der Unabhängigkeit). | *○* | *○* | *○* |
| … hat mich darauf hingewiesen, wo ich Informationen über geeignete Zweitmeiner finde. | *○* | *○* | *○* |
| … hat mich auf ein Patientenmerkblatt zum Zweitmeinungsverfahren aufmerksam gemacht. | *○* | *○* | *○* |
| … hat mir ein Patientenmerkblatt mitgegeben. | *○* | *○* | *○* |
| … hat mich auf eine Entscheidungshilfe zur Entfernung/Teilentfernung der Gaumenmandeln aufmerksam gemacht. | *○* | *○* | *○* |
| … hat mir deutlich gemacht, dass ich Kopien von Befundunterlagen für die Einholung einer Zweitmeinung mitnehmen kann. | *○* | *○* | *○* |

**Gesundheitsbezogene Daten und soziodemographische Daten**

*Im Folgenden stellen wir Ihnen Fragen zu Ihrer Gesundheit bzw. Ihrem Gesundheitsverhalten sowie einige soziodemographische Fragen. Die Angaben helfen, die Ergebnisse dieser Umfrage zu untersuchen bzw. auszuwerten. Wir möchten Sie hier nochmals darauf hinweisen, dass die Befragung anonym ist, d.h. dass keine Rückschlüsse auf Ihre Person gezogen werden können.*

1. Die folgenden Fragen beziehen sich darauf, wie Sie mit Gesundheitsinformationen umgehen. *Bitte kreuzen Sie für jede der Fragen das für Sie am meisten Zutreffende an.*

| **Wie einfach/ schwierig ist es, …** | Sehr schwierig | Ziemlich schwierig | Ziemlich einfach | Sehr einfach | Weiß nicht |
| --- | --- | --- | --- | --- | --- |
| … Informationen über Unterstützungsmöglich-keiten bei psychischen Problemen, wie Stress oder Depression, zu finden? | *○* | *○* | *○* | *○* | *○* |
| … Informationen über Verhaltensweisen zu finden, die gut für Ihr psychisches Wohlbefinden sind? | *○* | *○* | *○* | *○* | *○* |
| … herauszufinden, wo Sie professionelle Hilfe erhalten, wenn Sie krank sind? | *○* | *○* | *○* | *○* | *○* |
| … Informationen über Krankheitssymptome, die Sie betreffen, zu finden? | *○* | *○* | *○* | *○* | *○* |
| … Informationen in den Medien darüber, wie Sie Ihren Gesundheitszustand verbessern können, zu verstehen? | *○* | *○* | *○* | *○* | *○* |
| … Gesundheitsratschläge von Familien-mitgliedern oder Freunden zu verstehen? | *○* | *○* | *○* | *○* | *○* |
| … zu verstehen, was Ihr Arzt Ihnen sagt? | *○* | *○* | *○* | *○* | *○* |
| … zu verstehen, warum Sie Vorsorgeuntersuchungen brauchen? | *○* | *○* | *○* | *○* | *○* |
| … die Anweisungen Ihres Arztes oder Apothekers zur Einnahme der verschriebenen Medikamente zu verstehen? | *○* | *○* | *○* | *○* | *○* |
| … Gesundheitswarnungen vor Verhaltens-weisen wie Rauchen, wenig Bewegung oder übermäßiges Trinken zu verstehen? | *○* | *○* | *○* | *○* | *○* |
| … zu beurteilen, ob die Informationen über Gesundheitsrisiken in den Medien vertrauenswürdig sind? | *○* | *○* | *○* | *○* | *○* |
| … zu beurteilen, wann Sie eine zweite Meinung von einem anderen Arzt einholen sollten? | *○* | *○* | *○* | *○* | *○* |
| … zu beurteilen, welche Alltagsgewohnheiten mit Ihrer Gesundheit zusammenhängen? | *○* | *○* | *○* | *○* | *○* |
| … aufgrund von Informationen aus den Medien zu entscheiden, wie Sie sich vor Krankheiten schützen können? | *○* | *○* | *○* | *○* | *○* |
| … mit Hilfe der Informationen, die Ihnen der Arzt gibt, Entscheidungen bezüglich Ihrer Krankheit zu treffen? | *○* | *○* | *○* | *○* | *○* |
| … den Anweisungen Ihres Arztes oder Apothekers zu folgen? | *○* | *○* | *○* | *○* | *○* |

1. Die folgenden Aussagen beziehen sich darauf, wie umfangreich Sie von Ihrem Arzt informiert werden und an den Entscheidungen teilhaben möchten. *Bitte kreuzen Sie für jede der Aussagen das für Sie am meisten Zutreffende an.*

|  | Sehr dafür | Etwas dafür | Neutral | Etwas dagegen | Sehr dagegen |
| --- | --- | --- | --- | --- | --- |
| Wichtige medizinische Entscheidungen sollten von Ihrem Arzt/Ihrer Ärztin getroffen werden und nicht von Ihnen. | *○* | *○* | *○* | *○* | *○* |
| Sie sollten sich dem Rat Ihres Arztes/Ihrer Ärztin anschließen, auch wenn Sie anderer Meinung sind. | *○* | *○* | *○* | *○* | *○* |
| Während der Behandlung im Krankenhaus sollten Sie keine Entscheidungen über Ihre eigene Behandlung treffen. | *○* | *○* | *○* | *○* | *○* |
| Sie werden krank und Ihre Erkrankung verschlechtert sich. Möchten Sie, dass Ihr Arzt/Ihre Ärztin Ihre Behandlung in stärkerem Maße in die Hand nimmt? | *○* | *○* | *○* | *○* | *○* |
| Je mehr sich Ihre Erkrankung verschlechtert, umso mehr sollten Sie über Ihre Erkrankung aufgeklärt werden. | *○* | *○* | *○* | *○* | *○* |
| Sie sollten vollständig verstehen, was infolge der Krankheit in Ihrem Körper vor sich geht. | *○* | *○* | *○* | *○* | *○* |
| Auch bei schlechten Untersuchungs-ergebnissen, sollten Sie umfassend informiert werden. | *○* | *○* | *○* | *○* | *○* |
| Ihr Arzt/Ihre Ärztin sollte Ihnen den Zweck der Laboruntersuchungen erklären. | *○* | *○* | *○* | *○* | *○* |
| Es ist wichtig für Sie, alle Nebenwirkungen Ihrer Medikamente zu kennen. | *○* | *○* | *○* | *○* | *○* |
| Informationen über Ihre Krankheit sind für Sie genauso wichtig wie die Behandlung selbst. | *○* | *○* | *○* | *○* | *○* |
| Wenn es mehr als eine Möglichkeit der Behandlung gibt, sollten Sie über alle informiert werden. | *○* | *○* | *○* | *○* | *○* |

| 1. Welches Geschlecht haben Sie?   *○* Männlich  *○* Weiblich  *○* Divers |
| --- |
| 1. Die Ergebnisse dieser Befragung werden auch für unterschiedliche Altersgruppen ausgewertet. Bitte nennen Sie dazu Monat und Jahr Ihrer Geburt.   Geburtsmonat Geburtsjahr  ☐☐ ☐☐☐☐ |
| 1. Welchen Familienstand hatten Sie zur Zeit Ihrer Operation?   *○* Verheiratet/In eingetragener Lebenspartnerschaft (gleichgeschlechtlich), zusammenlebend 🡪 *Weiter mit Frage 33)*  *○* Verheiratet/In eingetragener Lebenspartnerschaft (gleichgeschlechtlich), getrennt lebend  *○* Geschieden/Eingetragene Lebenspartnerschaft aufgehoben (gleichgeschlechtlich)  *○* Verwitwet/Eingetragene/r Lebenspartner/-in verstorben (gleichgeschlechtlich)  *○* Ledig |
| 1. Lebten Sie zur Zeit Ihrer Operation mit einer Person aus Ihrem Haushalt in einer Partnerschaft?   *○* Ja  *○* Nein |
| 1. Welchen höchsten allgemeinbildenden Schulabschluss Sie zur Zeit Ihrer Operation?   *○* Schüler/-in, besuche eine allgemeinbildende Vollzeitschule  *○* Von der Schule abgegangen ohne Schulabschluss  *○* Hauptschulabschluss (Volksschulabschluss) oder gleichwertiger Abschluss  *○* Polytechnische Oberschule der DDR mit Abschluss der 8. oder 9. Klasse  *○* Realschulabschluss (Mittlere Reife) oder gleichwertiger Abschluss  *○* Polytechnische Oberschule der DDR mit Abschluss der 10. Klasse  *○* Fachhochschulreife  *○* Abitur/Allgemeine oder fachgebundene Hochschulreife  *○* Einen anderen Schulabschluss, und zwar: ___________________________________ |
| 1. Was war Ihr höchster beruflicher Ausbildungsstatus zur Zeit Ihrer Operation?   *○*Noch in beruflicher Ausbildung  *○*Ohne beruflichen Ausbildungsabschluss  *○* Abschluss einer beruflichen Ausbildung von mindestens einem Jahr  *○*Hochschulabschluss |
| 1. Für die Einordnung Ihres Wohnortes in eine Kleinstadt/ Mittelstadt/Großstadt würden wir gerne Ihre Postleitzahl zur Zeit Ihrer Operation wissen: ______________ |
| 1. Wie viele Personen lebten zur Zeit Ihrer Operation ständig in Ihrem Haushalt, Sie selbst eingeschlossen?   *○* Nur eine Person 🡪*Weiter mit Frage 38)*  *○* Mehrere Personen, und zwar: ___ ___ |
| 1. Wie viele Personen waren zur Zeit Ihrer Operation in Ihrem Haushalt über 14 Jahre alt? ______ __ |
| 1. Für die Auswertung nach Gruppen (z.B. niedriges Einkommen, mittleres Einkommen, hohes Einkommen) würden wir gerne wissen: Wie hoch war das durchschnittliche monatliche Nettoeinkommen Ihres Haushalts insgesamt zur Zeit Ihrer Operation?   *(Nehmen Sie die Summe aus Lohn/Gehalt, Einkommen aus selbstständiger Tätigkeit, Rente oder Pension, Einkünfte aus öffentlichen Beihilfen, Einkommen aus Vermietung und Verpachtung, Wohngeld, Kindergeld und sonstige Einkünfte und ziehen Sie dann Steuern und Sozialversicherungsbeiträge ab)*   | *○* 0 – 450 Euro  *○* 451 – 850 Euro  *○* 851 – 1000 Euro  *○* 1001 – 1250 Euro  *○* 1251 – 1500 Euro  *○* 1501 – 1750 Euro  *○* 1751 – 2000 Euro  *○* 2001 – 2250 Euro | *○* 2251 – 2500 Euro  *○* 2501 – 2750 Euro  *○* 2751 – 3000 Euro  *○* 3001 – 3250 Euro  *○* 3251 – 3500 Euro  *○* 3501 – 3750 Euro  *○* 3751 – 4000 Euro  *○* 4001 – 4500 Euro | *○* 4500 – 5000 Euro  *○* 5001 – 5500 Euro  *○* 5501 – 6000 Euro  *○* 6001 – 7500 Euro  *○* 7501 – 10.000 Euro  *○* 10.001 – 20.000 Euro  *○* Mehr als 20.000 Euro  *○* Keine Angabe | | --- | --- | --- | |

*Falls Sie noch Anmerkungen zu unserer Befragung haben oder uns etwas mitteilen möchten, haben Sie hier die Möglichkeit.*

|  |
| --- |

*Wir bedanken uns vielmals für Ihre Unterstützung!*

**Einleitung**

*Sie haben eine operative Entfernung/Teilentfernung der Gaumenmandeln Ihres Kindes durchführen lassen. Dafür haben Sie vorher von einer Ärztin oder einem Arzt oder auch von mehreren Ärztinnen oder Ärzten eine Empfehlung zur operativen Entfernung/Teilentfernung der Gaumenmandeln Ihres Kindes erhalten.*

*Wir wollen im Folgenden herausfinden, wie Sie die Entscheidung für die Operation Ihres Kindes getroffen haben, also z.B. welche Beratungsangebote Sie in Anspruch genommen haben. Außerdem würden wir gerne erfahren, wie zufrieden Sie mit den Informationen bezüglich einer operative Entfernung/Teilentfernung der Gaumenmandeln Ihres Kindes waren und ob Sie möglicherweise eine weitere Ärztin oder einen weiteren Arzt konsultiert haben.*

*Die Fragen sollen nur von dem Elternteil beantwortet werden, der bei der Mitteilung der Operationsempfehlung dabei war. Aus Gründen der Lesbarkeit wurde bei personenbezogenen Bezeichnungen nur die männliche Form gewählt. Nichtsdestotrotz beziehen sich die Angaben auf alle Geschlechter.*

**Allgemeines zur Operation Ihres Kindes**

1. Welche Gründe haben zur Empfehlung der operativen Entfernung/Teilentfernung der Gaumenmandeln Ihres Kindes geführt? *Mehrfachnennungen sind möglich.*

*○* Wiederkehrende Mandelentzündungen

*○* Vergrößerte Gaumenmandeln

*○* Bösartige Tumore (Krebs)

*○* Andere: _________ ___

*○* Ich weiß nicht

1. Wann wurde die Operation Ihres Kindes durchgeführt?

Monat Jahr

☐☐ ☐☐☐☐

1. Wer hat die Empfehlung zur operativen Entfernung/Teilentfernung der Gaumenmandeln Ihres Kindes als erstes ausgesprochen? *Bitte kreuzen Sie nur eine Antwort an.*

*○* Ein Arzt in einer Arztpraxis

*○* Ein Arzt im Krankenhaus (gemeint ist nicht das OP Aufklärungsgespräch)

*○* Andere: _________ ___

**Fragen zu dem Entscheidungsprozess und Informationen über die Operation Ihres Kindes**

1. Inwiefern hat sich der Gesundheitszustand Ihres Kindes nach der Entfernung/Teilentfernung der Gaumenmandeln verändert? *Bitte kreuzen Sie das für Sie am meisten Zutreffende an.*

| Starke Verschlechterung | Leichte Verschlechterung | Keine Veränderung | Leichte Verbesserung | Starke Verbesserung |  |
| --- | --- | --- | --- | --- | --- |
| *○* | *○* | *○* | *○* | *○* |  |

1. Denken Sie bitte zurück an die Zeit, in der Sie die Entscheidung für die Operation Ihres Kindes getroffen haben. Wie empfanden Sie die Entscheidung? *Bitte kreuzen Sie das für Sie am meisten Zutreffende an.*

| Sehr schwierig | Schwierig | Mittel | Leicht | Sehr leicht |  |
| --- | --- | --- | --- | --- | --- |
| *○* | *○* | *○* | *○* | *○* |  |

1. Wie dringlich haben Sie die Entscheidung empfunden? *Bitte kreuzen Sie das für Sie am meisten Zutreffende an.*

| Sehr dringlich | Dringlich | Mittel | Weniger dringlich | Gar nicht dringlich |  |
| --- | --- | --- | --- | --- | --- |
| *○* | *○* | *○* | *○* | *○* |  |

1. Denken Sie bitte zurück an das Gespräch mit Ihrem Arzt, der Ihnen erstmals eine operative Entfernung/Teilentfernung der Gaumenmandeln Ihres Kindes empfohlen hat. *Bitte kreuzen Sie das für Sie am meisten Zutreffende an*.

| **Wie fühlten Sie sich aufgeklärt hinsichtlich …** | Sehr schlecht | Schlecht | Mittel | Gut | Sehr gut |
| --- | --- | --- | --- | --- | --- |
| … der Erkrankung Ihres Kindes? | *○* | *○* | *○* | *○* | *○* |
| … der Behandlungsalternativen? | *○* | *○* | *○* | *○* | *○* |
| … der Vorteile der Operation Ihres Kindes? | *○* | *○* | *○* | *○* | *○* |
| … der Risiken und Nebenwirkungen der Operation Ihres Kindes? | *○* | *○* | *○* | *○* | *○* |

1. Denken Sie bitte zurück an das Gespräch mit Ihrem Arzt, der Ihnen erstmals eine operative Entfernung/Teilentfernung der Gaumenmandeln Ihres Kindes empfohlen hat. *Bitte kreuzen Sie das für Sie am meisten Zutreffende an.*

|  | Sehr schlecht | Schlecht | Mittel | Gut | Sehr gut |
| --- | --- | --- | --- | --- | --- |
| Wie nachvollziehbar war die Empfehlung zur Operation Ihres Kindes für Sie? | *○* | *○* | *○* | *○* | *○* |
| Wie verständlich waren die Informationen, die Sie erhielten? | *○* | *○* | *○* | *○* | *○* |
| Wie fühlten Sie sich insgesamt aufgeklärt? | *○* | *○* | *○* | *○* | *○* |

1. Hätten Sie sich vor der Operation Ihres Kindes zusätzliche Informationen gewünscht? *Mehrfachnennungen sind möglich.*

*○* Ja, ich wünschte mir mehr Informationen über…

*○* … die Erkrankung

*○* … die Behandlungsmöglichkeiten

*○* … die Vorteile einer Operation

*○* … die Nachteile einer Operation

*○* Andere: _________ ___

*○* Nein, ich wünschte mir keine zusätzlichen Informationen.

1. Haben Sie sich vor der Operation Ihres Kindes woanders Informationen zu der Diagnose oder Behandlung eingeholt? *Mehrfachnennungen sind möglich.*

*○* Ja, ich habe…

*○* … im Internet recherchiert

*○* … mit Angehörigen/Freunden gesprochen

*○* … bei der Krankenkasse nachgefragt

*○* … medizinisches Fachpersonal (z.B. Arzt, Krankengymnast) befragt

*○* Anderes: _________ __

*○* Nein 🡪 *Weiter mit Frage 16)*

1. FallsSie sich weitere Informationen eingeholt haben, welche Quelle war für Sie die wichtigste?

|  |
| --- |

1. Denken Sie bitte nun nur an die Quelle, die für Sie am wichtigsten war, also über das Gespräch mit Ihrem Arzt, der Ihnen erstmals eine operative Entfernung/Teilentfernung der Gaumenmandeln Ihres Kindes empfohlen hat, hinaus. *Bitte kreuzen Sie das für Sie am meisten Zutreffende an.*

|  | Sehr schwer | Schwer | Mittel | Leicht | Sehr leicht |
| --- | --- | --- | --- | --- | --- |
| Wie war es für Sie zusätzliche Informationen aus der anderen Quelle zu erhalten? | *○* | *○* | *○* | *○* | *○* |
| Wie verständlich waren die zusätzlichen Informationen aus der anderen Quelle? | *○* | *○* | *○* | *○* | *○* |

1. Wie vertrauenswürdig fanden Sie die zusätzlichen Informationen aus der anderen Quelle? Berücksichtigen Sie bitte nur die Quelle, die für Sie am wichtigsten war. *Bitte kreuzen Sie das für Sie am meisten Zutreffende an.*

| Nicht vertrauenswürdig | Weniger vertrauenswürdig | Mittel | Eher vertrauenswürdig | Sehr vertrauenswürdig |  |
| --- | --- | --- | --- | --- | --- |
| *○* | *○* | *○* | *○* | *○* |  |

1. Inwiefern haben die zusätzlichen Informationen aus der anderen Quelle zu Ihrer Entscheidung beigetragen? Berücksichtigen Sie bitte nur die Quelle, die für Sie am wichtigsten war. *Bitte kreuzen Sie das für Sie am meisten Zutreffende an.*

| Gar nicht | Wenig | Mittel | Etwas | Sehr stark |  |
| --- | --- | --- | --- | --- | --- |
| *○* | *○* | *○* | *○* | *○* |  |

1. Inwiefern haben Sie die zusätzlichen Informationen aus der anderen Quelle verunsichert?Berücksichtigen Sie bitte nur die Quelle, die für Sie am wichtigsten war. *Bitte kreuzen Sie das für Sie am meisten Zutreffende an.*

| Gar nicht | Wenig | Mittel | Etwas | Sehr stark |  |
| --- | --- | --- | --- | --- | --- |
| *○* | *○* | *○* | *○* | *○* |  |

1. Bitte denken Sie noch einmal intensiv über den gesamten Entscheidungsprozess für die Operation Ihres Kindes nach. Wie haben Sie den Entscheidungsprozess empfunden? *Bitte kreuzen Sie für jede der Aussagen das für Sie am meisten Zutreffende an.*

|  | Trifft über-haupt nicht zu | Trifft eher nicht zu | Trifft teil-weise zu | Trifft eher zu | Trifft voll-ständig zu |
| --- | --- | --- | --- | --- | --- |
| Ich wusste, welche Wahlmöglichkeiten ich hatte. | *○* | *○* | *○* | *○* | *○* |
| Ich kannte die Vorteile jeder Wahlmöglichkeit. | *○* | *○* | *○* | *○* | *○* |
| Ich kannte die Risiken und Nebenwirkungen jeder Wahlmöglichkeit. | *○* | *○* | *○* | *○* | *○* |
| Ich war mir darüber im Klaren, welche Vorteile für mich am wichtigsten waren. | *○* | *○* | *○* | *○* | *○* |
| Ich war mir darüber im Klaren, welche Risiken und Nebenwirkungen für mich am wichtigsten waren. | *○* | *○* | *○* | *○* | *○* |
| Ich war mir darüber im Klaren, was mir wichtiger war (Vorteile oder Risiken und Nebenwirkungen). | *○* | *○* | *○* | *○* | *○* |
| Ich hatte genug Unterstützung von Anderen, um diese Entscheidung zu treffen. | *○* | *○* | *○* | *○* | *○* |
| Ich traf diese Entscheidung ohne Druck von Anderen. | *○* | *○* | *○* | *○* | *○* |
| Ich hatte genügend Beratung, um diese Entscheidung zu treffen. | *○* | *○* | *○* | *○* | *○* |
| Ich war mir darüber im Klaren, was für mich die beste Wahl war. | *○* | *○* | *○* | *○* | *○* |
| Ich war mir sicher, wofür ich mich entscheiden sollte. | *○* | *○* | *○* | *○* | *○* |
| Diese Entscheidung fiel mir leicht. | *○* | *○* | *○* | *○* | *○* |
| Ich hatte das Gefühl eine informierte Entscheidung getroffen zu haben. | *○* | *○* | *○* | *○* | *○* |
| Meine Entscheidung zeigte, was mir wichtig ist. | *○* | *○* | *○* | *○* | *○* |
| Ich war mit meiner Entscheidung zufrieden. | *○* | *○* | *○* | *○* | *○* |

1. Wir möchten gerne erfahren, wie Sie nun nachträglich über Ihre Entscheidung für die Operation Ihres Kindes denken. *Bitte kreuzen Sie für jede der Aussagen das für Sie am meisten Zutreffende an.*

|  | Ich stimme überein | Ich stimme eher überein | Weder noch | Ich stimme eher nicht überein | Ich stimme nicht überein |
| --- | --- | --- | --- | --- | --- |
| Es war die richtige Entscheidung. | *○* | *○* | *○* | *○* | *○* |
| Ich bereue die Wahl, die ich getroffen habe. | *○* | *○* | *○* | *○* | *○* |
| Ich würde die gleiche Wahl wieder treffen, wenn ich die Entscheidung erneut treffen müsste. | *○* | *○* | *○* | *○* | *○* |
| Die Wahl hat mir viel Leid bereitet. | *○* | *○* | *○* | *○* | *○* |
| Die Entscheidung war vernünftig. | *○* | *○* | *○* | *○* | *○* |

**Fragen zu einer Zweitmeinung**

*Unter einer Zweitmeinung verstehen wir, dass Sie sich mit einer konkreten medizinischen Fragestellung bei einem weiteren Arzt vorstellen, beispielsweise um eine Diagnose oder einen Behandlungsvorschlag Ihres Arztes abzusichern oder nach Alternativen zu suchen. In Ihrem Fall bedeutet dies, dass Sie sich nach der Empfehlung für die operative Entfernung/Teilentfernung der Gaumenmandeln Ihres Kindes bei einem anderen Arzt eine Zweitmeinung eingeholt haben, bevor Ihr Kind operiert wurde.*

1. Haben Sie vor der operativen Entfernung/Teilentfernung der Gaumenmandeln Ihres Kindes eine Zweitmeinung in Anspruch genommen?

*○* Ja

*○* Nein 🡪*Weiter mit Frage 24)*

1. Falls Sie eine Zweitmeinung in Anspruch genommen haben, bei wem haben Sie die Zweitmeinung eingeholt? *Bitte kreuzen Sie nur eine Antwort an.*

*○* Arzt in einer Arztpraxis

*○* Arzt im Krankenhaus (gemeint ist nicht das OP Aufklärungsgespräch)

*○* Krankenkasse

*○* Andere: _ _______________

1. Hat der Arzt, bei dem Sie eine Zweitmeinung eingeholt haben, auch die Operation Ihres Kindes durchgeführt? Bitte beziehen Sie sich nicht auf das OP-Aufklärungsgespräch, sondern nur auf den Fall, dass Sie sich bei diesem Arzt aktiv um eine Zweitmeinung bemüht haben.

*○* Ja

*○* Nein

1. Wurde die Erstmeinung durch die Zweitmeinung bestätigt?

*○* Ja

*○* Teilweise

*○* Nein

1. Inwiefern hat die Zweitmeinung zu Ihrer Entscheidung beigetragen?

*○* Ich war mir nach Einholung der Zweitmeinung sicher, welche Behandlung ich für mein Kind wählen
 soll.

*○* Ich war mir nach Einholung der Zweitmeinung trotzdem nicht sicher, welche Behandlung ich für mein
 Kind wählen soll.

1. Haben Sie sich im Anschluss noch eine dritte Meinung eingeholt?

*○* Ja

*○* Nein

1. Neben einem persönlichen Arzt-Patienten-Kontakt gibt es auch andere Optionen, eine Zweitmeinung einzuholen. Beispielsweise besteht die Möglichkeit, die Befundunterlagen dem Zweitmeiner zuzusenden und eine telefonische oder schriftliche Stellungnahme zu erhalten. Wir würden im Folgenden gerne wissen, welche Optionen zur Einholung einer Zweitmeinung bezüglich der Entfernung/Teilentfernung der Gaumenmandeln Ihres Kindes für Sie in Frage gekommen sind. *Bitte kreuzen Sie für jede Möglichkeit eine Antwort an.*

|  | Kam nicht in Frage | Kam eher nicht in Frage | Neutral | Kam eher in Frage | Kam in Frage |
| --- | --- | --- | --- | --- | --- |
| Persönliche Beratung vor Ort | *○* | *○* | *○* | *○* | *○* |
| Telefonische Beratung | *○* | *○* | *○* | *○* | *○* |
| Schriftliche Beratung per E-Mail/Post | *○* | *○* | *○* | *○* | *○* |

1. Wenn Sie sich **keine** Zweitmeinung eingeholt haben, welche Gründe gab es dafür? *Bitte kreuzen Sie für jede der Aussagen das für Sie am meisten Zutreffende an. Wenn Sie eine Zweitmeinung eingeholt haben 🡪 Weiter mit Frage 26)*

| **Ich habe keine Zweitmeinung eingeholt, weil ich…** | Trifft  überhaupt  nicht zu | Trifft eher nicht zu | Trifft eher zu | Trifft  vollständig  zu |
| --- | --- | --- | --- | --- |
| …mir den Eingriff, unabhängig davon, was ein weiterer Arzt sagt, wünschte. | *○* | *○* | *○* | *○* |
| …den Eingriff als letzte Möglichkeit sah. | *○* | *○* | *○* | *○* |
| …vollstes Vertrauen in meinen Arzt hatte und die Entscheidung in seine Hände legte. | *○* | *○* | *○* | *○* |
| …Angst hatte, dass sich das Verhältnis zu meinem Arzt durch das Einholen einer Zweitmeinung verschlechtert. | *○* | *○* | *○* | *○* |
| …dachte, dass zu viele Meinungen nur zu Verunsicherung führen. | *○* | *○* | *○* | *○* |
| …genügend Informationen hatte und mich dann anhand dieser entschieden habe. | *○* | *○* | *○* | *○* |
| …fand, dass der Aufwand, den ich zur Einholung der Zweitmeinung erbringen musste, zu hoch war. | *○* | *○* | *○* | *○* |
| Andere Gründe gegen die Einholung einer Zweitmeinung: | | | | |

**Gesundheitsbezogene Daten und soziodemographische Daten**

*Im Folgenden stellen wir Ihnen Fragen zu Ihrer Gesundheit bzw. Ihrem Gesundheitsverhalten sowie einige soziodemographische Fragen. Die Angaben helfen, die Ergebnisse dieser Umfrage zu untersuchen bzw. auszuwerten. Wir möchten Sie hier nochmals darauf hinweisen, dass die Befragung anonym ist, d.h. dass keine Rückschlüsse auf Ihre Person und Ihr Kind gezogen werden können.*

1. Die folgenden Fragen beziehen sich darauf, wie Sie mit Gesundheitsinformationen umgehen. *Bitte kreuzen Sie für jede der Fragen das für Sie am meisten Zutreffende an.*

| **Wie einfach/ schwierig ist es, …** | Sehr schwierig | Ziemlich schwierig | Ziemlich einfach | Sehr einfach | Weiß nicht |
| --- | --- | --- | --- | --- | --- |
| … Informationen über Unterstützungsmöglich-keiten bei psychischen Problemen, wie Stress oder Depression, zu finden? | *○* | *○* | *○* | *○* | *○* |
| … Informationen über Verhaltensweisen zu finden, die gut für Ihr psychisches Wohlbefinden sind? | *○* | *○* | *○* | *○* | *○* |
| … herauszufinden, wo Sie professionelle Hilfe erhalten, wenn Sie krank sind? | *○* | *○* | *○* | *○* | *○* |
| … Informationen über Krankheitssymptome, die Sie betreffen, zu finden? | *○* | *○* | *○* | *○* | *○* |
| … Informationen in den Medien darüber, wie Sie Ihren Gesundheitszustand verbessern können, zu verstehen? | *○* | *○* | *○* | *○* | *○* |
| … Gesundheitsratschläge von Familien-mitgliedern oder Freunden zu verstehen? | *○* | *○* | *○* | *○* | *○* |
| … zu verstehen, was Ihr Arzt Ihnen sagt? | *○* | *○* | *○* | *○* | *○* |
| … zu verstehen, warum Sie Vorsorgeuntersuchungen brauchen? | *○* | *○* | *○* | *○* | *○* |
| … die Anweisungen Ihres Arztes oder Apothekers zur Einnahme der verschriebenen Medikamente zu verstehen? | *○* | *○* | *○* | *○* | *○* |
| … Gesundheitswarnungen vor Verhaltens-weisen wie Rauchen, wenig Bewegung oder übermäßiges Trinken zu verstehen? | *○* | *○* | *○* | *○* | *○* |
| … zu beurteilen, ob die Informationen über Gesundheitsrisiken in den Medien vertrauenswürdig sind? | *○* | *○* | *○* | *○* | *○* |
| … zu beurteilen, wann Sie eine zweite Meinung von einem anderen Arzt einholen sollten? | *○* | *○* | *○* | *○* | *○* |
| … zu beurteilen, welche Alltagsgewohnheiten mit Ihrer Gesundheit zusammenhängen? | *○* | *○* | *○* | *○* | *○* |
| … aufgrund von Informationen aus den Medien zu entscheiden, wie Sie sich vor Krankheiten schützen können? | *○* | *○* | *○* | *○* | *○* |
| … mit Hilfe der Informationen, die Ihnen der Arzt gibt, Entscheidungen bezüglich Ihrer Krankheit zu treffen? | *○* | *○* | *○* | *○* | *○* |
| … den Anweisungen Ihres Arztes oder Apothekers zu folgen? | *○* | *○* | *○* | *○* | *○* |

1. Die folgenden Aussagen beziehen sich darauf, wie umfangreich Sie von Ihrem Arzt informiert werden und an den Entscheidungen teilhaben möchten. *Bitte kreuzen Sie für jede der Aussagen das für Sie am meisten Zutreffende an.*

|  | Sehr dafür | Etwas dafür | Neutral | Etwas dagegen | Sehr dagegen |
| --- | --- | --- | --- | --- | --- |
| Wichtige medizinische Entscheidungen sollten von Ihrem Arzt/Ihrer Ärztin getroffen werden und nicht von Ihnen. | *○* | *○* | *○* | *○* | *○* |
| Sie sollten sich dem Rat Ihres Arztes/Ihrer Ärztin anschließen, auch wenn Sie anderer Meinung sind. | *○* | *○* | *○* | *○* | *○* |
| Während der Behandlung im Krankenhaus sollten Sie keine Entscheidungen über Ihre eigene Behandlung treffen. | *○* | *○* | *○* | *○* | *○* |
| Sie werden krank und Ihre Erkrankung verschlechtert sich. Möchten Sie, dass Ihr Arzt/Ihre Ärztin Ihre Behandlung in stärkerem Maße in die Hand nimmt? | *○* | *○* | *○* | *○* | *○* |
| Je mehr sich Ihre Erkrankung verschlechtert, umso mehr sollten Sie über Ihre Erkrankung aufgeklärt werden. | *○* | *○* | *○* | *○* | *○* |
| Sie sollten vollständig verstehen, was infolge der Krankheit in Ihrem Körper vor sich geht. | *○* | *○* | *○* | *○* | *○* |
| Auch bei schlechten Untersuchungs-ergebnissen, sollten Sie umfassend informiert werden. | *○* | *○* | *○* | *○* | *○* |
| Ihr Arzt/Ihre Ärztin sollte Ihnen den Zweck der Laboruntersuchungen erklären. | *○* | *○* | *○* | *○* | *○* |
| Es ist wichtig für Sie, alle Nebenwirkungen Ihrer Medikamente zu kennen. | *○* | *○* | *○* | *○* | *○* |
| Informationen über Ihre Krankheit sind für Sie genauso wichtig wie die Behandlung selbst. | *○* | *○* | *○* | *○* | *○* |
| Wenn es mehr als eine Möglichkeit der Behandlung gibt, sollten Sie über alle informiert werden. | *○* | *○* | *○* | *○* | *○* |

| 1. Hatten Sie selbst eine operative Entfernung/Teilentfernung der Gaumenmandeln?   *○* Ja  *○* Nein |
| --- |
| 1. Welches Geschlecht haben Sie?   *○* Männlich  *○* Weiblich  *○* Divers |
| 1. Welches Geschlecht hat Ihr Kind?   *○* Männlich  *○* Weiblich  *○* Divers |
| 1. Die Ergebnisse dieser Befragung werden auch für unterschiedliche Altersgruppen ausgewertet. Bitte nennen Sie dazu Monat und Jahr Ihrer Geburt.   Geburtsmonat Geburtsjahr  ☐☐ ☐☐☐☐ |
| 1. Bitte nennen Sie Monat und Jahr der Geburt Ihres Kindes.   Geburtsmonat Geburtsjahr  ☐☐ ☐☐☐☐ |
| 1. Welchen Familienstand hatten Sie zur Zeit der Operation Ihres Kindes?   *○* Verheiratet/In eingetragener Lebenspartnerschaft (gleichgeschlechtlich), zusammenlebend 🡪 *Weiter mit Frage 35)*  *○* Verheiratet/In eingetragener Lebenspartnerschaft (gleichgeschlechtlich), getrennt lebend  *○* Geschieden/Eingetragene Lebenspartnerschaft aufgehoben (gleichgeschlechtlich)  *○* Verwitwet/Eingetragene/r Lebenspartner/-in verstorben (gleichgeschlechtlich)  *○* Ledig |
| 1. Lebten Sie zur Zeit der Operation Ihres Kindes mit einer Person aus Ihrem Haushalt in einer Partnerschaft?   *○* Ja  *○* Nein |
| 1. Welchen höchsten allgemeinbildenden Schulabschluss Sie zur Zeit der Operation Ihres Kindes hatten?   *○* Schüler/-in, besuche eine allgemeinbildende Vollzeitschule  *○* Von der Schule abgegangen ohne Schulabschluss  *○* Hauptschulabschluss (Volksschulabschluss) oder gleichwertiger Abschluss  *○* Polytechnische Oberschule der DDR mit Abschluss der 8. oder 9. Klasse  *○* Realschulabschluss (Mittlere Reife) oder gleichwertiger Abschluss  *○* Polytechnische Oberschule der DDR mit Abschluss der 10. Klasse  *○* Fachhochschulreife  *○* Abitur/Allgemeine oder fachgebundene Hochschulreife  *○* Einen anderen Schulabschluss, und zwar: ___________________________________ |
| 1. Was war Ihr höchster beruflicher Ausbildungsstatus zur Zeit der Operation Ihres Kindes?   *○*Noch in beruflicher Ausbildung  *○*Ohne beruflichen Ausbildungsabschluss  *○* Abschluss einer beruflichen Ausbildung von mindestens einem Jahr  *○*Hochschulabschluss |
| 1. Für die Einordnung Ihres Wohnortes in eine Kleinstadt/ Mittelstadt/Großstadt würden wir gerne Ihre Postleitzahl zur Zeit der Operation Ihres Kindes wissen: ______________ |
| 1. Wie viele Personen lebten zur Zeit der Operation Ihres Kindes ständig in Ihrem Haushalt, Sie selbst eingeschlossen?   *○* Nur eine Person 🡪*Weiter mit Frage 40)*  *○* Mehrere Personen, und zwar: ___ __ |
| 1. Wie viele Personen waren zur Zeit der Operation Ihres Kindes in Ihrem Haushalt über 14 Jahre alt? ____ ____ |
| 1. Für die Auswertung nach Gruppen (z.B. niedriges Einkommen, mittleres Einkommen, hohes Einkommen) würden wir gerne wissen: Wie hoch war das durchschnittliche monatliche Nettoeinkommen Ihres Haushalts insgesamt zur Zeit der Operation Ihres Kindes?   *(Nehmen Sie die Summe aus Lohn/Gehalt, Einkommen aus selbstständiger Tätigkeit, Rente oder Pension, Einkünfte aus öffentlichen Beihilfen, Einkommen aus Vermietung und Verpachtung, Wohngeld, Kindergeld und sonstige Einkünfte und ziehen Sie dann Steuern und Sozialversicherungsbeiträge ab)*   | *○* 0 – 450 Euro  *○* 451 – 850 Euro  *○* 851 – 1000 Euro  *○* 1001 – 1250 Euro  *○* 1251 – 1500 Euro  *○* 1501 – 1750 Euro  *○* 1751 – 2000 Euro  *○* 2001 – 2250 Euro | *○* 2251 – 2500 Euro  *○* 2501 – 2750 Euro  *○* 2751 – 3000 Euro  *○* 3001 – 3250 Euro  *○* 3251 – 3500 Euro  *○* 3501 – 3750 Euro  *○* 3751 – 4000 Euro  *○* 4001 – 4500 Euro | *○* 4500 – 5000 Euro  *○* 5001 – 5500 Euro  *○* 5501 – 6000 Euro  *○* 6001 – 7500 Euro  *○* 7501 – 10.000 Euro  *○* 10.001 – 20.000 Euro  *○* Mehr als 20.000 Euro  *○* Keine Angabe | | --- | --- | --- | |

*Falls Sie noch Anmerkungen zu unserer Befragung haben oder uns etwas mitteilen möchten, haben Sie hier die Möglichkeit.*

|  |
| --- |

*Wir bedanken uns vielmals für Ihre Unterstützung!*

**Einleitung**

*Sie haben eine operative Entfernung/Teilentfernung der Gaumenmandeln Ihres Kindes durchführen lassen. Dafür haben Sie vorher von einer Ärztin oder einem Arzt oder auch von mehreren Ärztinnen oder Ärzten eine Empfehlung zur operativen Entfernung/Teilentfernung der Gaumenmandeln Ihres Kindes erhalten.*

*Wir wollen im Folgenden herausfinden, wie Sie die Entscheidung für die Operation Ihres Kindes getroffen haben, also z.B. welche Beratungsangebote Sie in Anspruch genommen haben. Außerdem würden wir gerne erfahren, wie zufrieden Sie mit den Informationen bezüglich einer operative Entfernung/Teilentfernung der Gaumenmandeln Ihres Kindes waren und ob Sie möglicherweise eine weitere Ärztin oder einen weiteren Arzt konsultiert haben.*

*Die Fragen sollen nur von dem Elternteil beantwortet werden, der bei der Mitteilung der Operationsempfehlung dabei war. Aus Gründen der Lesbarkeit wurde bei personenbezogenen Bezeichnungen nur die männliche Form gewählt. Nichtsdestotrotz beziehen sich die Angaben auf alle Geschlechter.*

**Allgemeines zur Operation Ihres Kindes**

1. Welche Gründe haben zur Empfehlung der operativen Entfernung/Teilentfernung der Gaumenmandeln Ihres Kindes geführt? *Mehrfachnennungen sind möglich.*

*○* Wiederkehrende Mandelentzündungen

*○* Vergrößerte Gaumenmandeln

*○* Bösartige Tumore (Krebs)

*○* Andere: _________ ___

*○* Ich weiß nicht

1. Wann wurde die Operation Ihres Kindes durchgeführt?

Monat Jahr

☐☐ ☐☐☐☐

1. Wer hat die Empfehlung zur operativen Entfernung/Teilentfernung der Gaumenmandeln Ihres Kindes als erstes ausgesprochen? *Bitte kreuzen Sie nur eine Antwort an.*

*○* Ein Arzt in einer Arztpraxis

*○* Ein Arzt im Krankenhaus (gemeint ist nicht das OP Aufklärungsgespräch)

*○* Andere: _________ ___

**Fragen zu dem Entscheidungsprozess und Informationen über die Operation Ihres Kindes**

1. Inwiefern hat sich der Gesundheitszustand Ihres Kindes nach der Entfernung/Teilentfernung der Gaumenmandeln verändert? *Bitte kreuzen Sie das für Sie am meisten Zutreffende an.*

| Starke Verschlechterung | Leichte Verschlechterung | Keine Veränderung | Leichte Verbesserung | Starke Verbesserung |  |
| --- | --- | --- | --- | --- | --- |
| *○* | *○* | *○* | *○* | *○* |  |

1. Denken Sie bitte zurück an die Zeit, in der Sie die Entscheidung für die Operation Ihres Kindes getroffen haben. Wie empfanden Sie die Entscheidung? *Bitte kreuzen Sie das für Sie am meisten Zutreffende an.*

| Sehr schwierig | Schwierig | Mittel | Leicht | Sehr leicht |  |
| --- | --- | --- | --- | --- | --- |
| *○* | *○* | *○* | *○* | *○* |  |

1. Wie dringlich haben Sie die Entscheidung empfunden? *Bitte kreuzen Sie das für Sie am meisten Zutreffende an.*

| Sehr dringlich | Dringlich | Mittel | Weniger dringlich | Gar nicht dringlich |  |
| --- | --- | --- | --- | --- | --- |
| *○* | *○* | *○* | *○* | *○* |  |

1. Denken Sie bitte zurück an das Gespräch mit Ihrem Arzt, der Ihnen erstmals eine operative Entfernung/Teilentfernung der Gaumenmandeln Ihres Kindes empfohlen hat. *Bitte kreuzen Sie das für Sie am meisten Zutreffende an*.

| **Wie fühlten Sie sich aufgeklärt hinsichtlich …** | Sehr schlecht | Schlecht | Mittel | Gut | Sehr gut |
| --- | --- | --- | --- | --- | --- |
| … der Erkrankung Ihres Kindes? | *○* | *○* | *○* | *○* | *○* |
| … der Behandlungsalternativen? | *○* | *○* | *○* | *○* | *○* |
| … der Vorteile der Operation Ihres Kindes? | *○* | *○* | *○* | *○* | *○* |
| … der Risiken und Nebenwirkungen der Operation Ihres Kindes? | *○* | *○* | *○* | *○* | *○* |

1. Denken Sie bitte zurück an das Gespräch mit Ihrem Arzt, der Ihnen erstmals eine operative Entfernung/Teilentfernung der Gaumenmandeln Ihres Kindes empfohlen hat. *Bitte kreuzen Sie das für Sie am meisten Zutreffende an.*

|  | Sehr schlecht | Schlecht | Mittel | Gut | Sehr gut |
| --- | --- | --- | --- | --- | --- |
| Wie nachvollziehbar war die Empfehlung zur Operation Ihres Kindes für Sie? | *○* | *○* | *○* | *○* | *○* |
| Wie verständlich waren die Informationen, die Sie erhielten? | *○* | *○* | *○* | *○* | *○* |
| Wie fühlten Sie sich insgesamt aufgeklärt? | *○* | *○* | *○* | *○* | *○* |

1. Hätten Sie sich vor der Operation Ihres Kindes zusätzliche Informationen gewünscht? *Mehrfachnennungen sind möglich.*

*○* Ja, ich wünschte mir mehr Informationen über…

*○* … die Erkrankung

*○* … die Behandlungsmöglichkeiten

*○* … die Vorteile einer Operation

*○* … die Nachteile einer Operation

*○* Andere: _________ ___

*○* Nein, ich wünschte mir keine zusätzlichen Informationen.

1. Haben Sie sich vor der Operation Ihres Kindes woanders Informationen zu der Diagnose oder Behandlung eingeholt? *Mehrfachnennungen sind möglich.*

*○* Ja, ich habe…

*○* … im Internet recherchiert

*○* … mit Angehörigen/Freunden gesprochen

*○* … bei der Krankenkasse nachgefragt

*○* … medizinisches Fachpersonal (z.B. Arzt, Krankengymnast) befragt

*○* Anderes: _________ __

*○* Nein 🡪 *Weiter mit Frage 16)*

1. FallsSie sich weitere Informationen eingeholt haben, welche Quelle war für Sie die wichtigste?

|  |
| --- |

1. Denken Sie bitte nun nur an die Quelle, die für Sie am wichtigsten war, also über das Gespräch mit Ihrem Arzt, der Ihnen erstmals eine operative Entfernung/Teilentfernung der Gaumenmandeln Ihres Kindes empfohlen hat, hinaus. *Bitte kreuzen Sie das für Sie am meisten Zutreffende an.*

|  | Sehr schwer | Schwer | Mittel | Leicht | Sehr leicht |
| --- | --- | --- | --- | --- | --- |
| Wie war es für Sie zusätzliche Informationen aus der anderen Quelle zu erhalten? | *○* | *○* | *○* | *○* | *○* |
| Wie verständlich waren die zusätzlichen Informationen aus der anderen Quelle? | *○* | *○* | *○* | *○* | *○* |

1. Wie vertrauenswürdig fanden Sie die zusätzlichen Informationen aus der anderen Quelle? Berücksichtigen Sie bitte nur die Quelle, die für Sie am wichtigsten war. *Bitte kreuzen Sie das für Sie am meisten Zutreffende an.*

| Nicht vertrauenswürdig | Weniger vertrauenswürdig | Mittel | Eher vertrauenswürdig | Sehr vertrauenswürdig |  |
| --- | --- | --- | --- | --- | --- |
| *○* | *○* | *○* | *○* | *○* |  |

1. Inwiefern haben die zusätzlichen Informationen aus der anderen Quelle zu Ihrer Entscheidung beigetragen? Berücksichtigen Sie bitte nur die Quelle, die für Sie am wichtigsten war. *Bitte kreuzen Sie das für Sie am meisten Zutreffende an.*

| Gar nicht | Wenig | Mittel | Etwas | Sehr stark |  |
| --- | --- | --- | --- | --- | --- |
| *○* | *○* | *○* | *○* | *○* |  |

1. Inwiefern haben Sie die zusätzlichen Informationen aus der anderen Quelle verunsichert?Berücksichtigen Sie bitte nur die Quelle, die für Sie am wichtigsten war. *Bitte kreuzen Sie das für Sie am meisten Zutreffende an.*

| Gar nicht | Wenig | Mittel | Etwas | Sehr stark |  |
| --- | --- | --- | --- | --- | --- |
| *○* | *○* | *○* | *○* | *○* |  |

1. Bitte denken Sie noch einmal intensiv über den gesamten Entscheidungsprozess für die Operation Ihres Kindes nach. Wie haben Sie den Entscheidungsprozess empfunden? *Bitte kreuzen Sie für jede der Aussagen das für Sie am meisten Zutreffende an.*

|  | Trifft über-haupt nicht zu | Trifft eher nicht zu | Trifft teil-weise zu | Trifft eher zu | Trifft voll-ständig zu |
| --- | --- | --- | --- | --- | --- |
| Ich wusste, welche Wahlmöglichkeiten ich hatte. | *○* | *○* | *○* | *○* | *○* |
| Ich kannte die Vorteile jeder Wahlmöglichkeit. | *○* | *○* | *○* | *○* | *○* |
| Ich kannte die Risiken und Nebenwirkungen jeder Wahlmöglichkeit. | *○* | *○* | *○* | *○* | *○* |
| Ich war mir darüber im Klaren, welche Vorteile für mich am wichtigsten waren. | *○* | *○* | *○* | *○* | *○* |
| Ich war mir darüber im Klaren, welche Risiken und Nebenwirkungen für mich am wichtigsten waren. | *○* | *○* | *○* | *○* | *○* |
| Ich war mir darüber im Klaren, was mir wichtiger war (Vorteile oder Risiken und Nebenwirkungen). | *○* | *○* | *○* | *○* | *○* |
| Ich hatte genug Unterstützung von Anderen, um diese Entscheidung zu treffen. | *○* | *○* | *○* | *○* | *○* |
| Ich traf diese Entscheidung ohne Druck von Anderen. | *○* | *○* | *○* | *○* | *○* |
| Ich hatte genügend Beratung, um diese Entscheidung zu treffen. | *○* | *○* | *○* | *○* | *○* |
| Ich war mir darüber im Klaren, was für mich die beste Wahl war. | *○* | *○* | *○* | *○* | *○* |
| Ich war mir sicher, wofür ich mich entscheiden sollte. | *○* | *○* | *○* | *○* | *○* |
| Diese Entscheidung fiel mir leicht. | *○* | *○* | *○* | *○* | *○* |
| Ich hatte das Gefühl eine informierte Entscheidung getroffen zu haben. | *○* | *○* | *○* | *○* | *○* |
| Meine Entscheidung zeigte, was mir wichtig ist. | *○* | *○* | *○* | *○* | *○* |
| Ich war mit meiner Entscheidung zufrieden. | *○* | *○* | *○* | *○* | *○* |

1. Wir möchten gerne erfahren, wie Sie nun nachträglich über Ihre Entscheidung für die Operation Ihres Kindes denken. *Bitte kreuzen Sie für jede der Aussagen das für Sie am meisten Zutreffende an.*

|  | Ich stimme überein | Ich stimme eher überein | Weder noch | Ich stimme eher nicht überein | Ich stimme nicht überein |
| --- | --- | --- | --- | --- | --- |
| Es war die richtige Entscheidung. | *○* | *○* | *○* | *○* | *○* |
| Ich bereue die Wahl, die ich getroffen habe. | *○* | *○* | *○* | *○* | *○* |
| Ich würde die gleiche Wahl wieder treffen, wenn ich die Entscheidung erneut treffen müsste. | *○* | *○* | *○* | *○* | *○* |
| Die Wahl hat mir viel Leid bereitet. | *○* | *○* | *○* | *○* | *○* |
| Die Entscheidung war vernünftig. | *○* | *○* | *○* | *○* | *○* |

**Fragen zu einer Zweitmeinung**

*Unter einer Zweitmeinung verstehen wir, dass Sie sich mit einer konkreten medizinischen Fragestellung bei einem weiteren Arzt vorstellen, beispielsweise um eine Diagnose oder einen Behandlungsvorschlag Ihres Arztes abzusichern oder nach Alternativen zu suchen. In Ihrem Fall bedeutet dies, dass Sie sich nach der Empfehlung für die operative Entfernung/Teilentfernung der Gaumenmandeln Ihres Kindes bei einem anderen Arzt eine Zweitmeinung eingeholt haben, bevor Ihr Kind operiert wurde.*

1. Haben Sie vor der operativen Entfernung/Teilentfernung der Gaumenmandeln Ihres Kindes eine Zweitmeinung in Anspruch genommen?

*○* Ja

*○* Nein 🡪*Weiter mit Frage 24)*

1. Falls Sie eine Zweitmeinung in Anspruch genommen haben, bei wem haben Sie die Zweitmeinung eingeholt? *Bitte kreuzen Sie nur eine Antwort an.*

*○* Arzt in einer Arztpraxis

*○* Arzt im Krankenhaus (gemeint ist nicht das OP Aufklärungsgespräch)

*○* Krankenkasse

*○* Andere: _ _______________

1. Hat der Arzt, bei dem Sie eine Zweitmeinung eingeholt haben, auch die Operation Ihres Kindes durchgeführt? Bitte beziehen Sie sich nicht auf das OP-Aufklärungsgespräch, sondern nur auf den Fall, dass Sie sich bei diesem Arzt aktiv um eine Zweitmeinung bemüht haben.

*○* Ja

*○* Nein

1. Wurde die Erstmeinung durch die Zweitmeinung bestätigt?

*○* Ja

*○* Teilweise

*○* Nein

1. Inwiefern hat die Zweitmeinung zu Ihrer Entscheidung beigetragen?

*○* Ich war mir nach Einholung der Zweitmeinung sicher, welche Behandlung ich für mein Kind wählen
 soll.

*○* Ich war mir nach Einholung der Zweitmeinung trotzdem nicht sicher, welche Behandlung ich für mein
 Kind wählen soll.

1. Haben Sie sich im Anschluss noch eine dritte Meinung eingeholt?

*○* Ja

*○* Nein

1. Neben einem persönlichen Arzt-Patienten-Kontakt gibt es auch andere Optionen, eine Zweitmeinung einzuholen. Beispielsweise besteht die Möglichkeit, die Befundunterlagen dem Zweitmeiner zuzusenden und eine telefonische oder schriftliche Stellungnahme zu erhalten. Wir würden im Folgenden gerne wissen, welche Optionen zur Einholung einer Zweitmeinung bezüglich der Entfernung/Teilentfernung der Gaumenmandeln Ihres Kindes für Sie in Frage gekommen sind. *Bitte kreuzen Sie für jede Möglichkeit eine Antwort an.*

|  | Kam nicht in Frage | Kam eher nicht in Frage | Neutral | Kam eher in Frage | Kam in Frage |
| --- | --- | --- | --- | --- | --- |
| Persönliche Beratung vor Ort | *○* | *○* | *○* | *○* | *○* |
| Telefonische Beratung | *○* | *○* | *○* | *○* | *○* |
| Schriftliche Beratung per E-Mail/Post | *○* | *○* | *○* | *○* | *○* |

1. Wenn Sie sich **keine** Zweitmeinung eingeholt haben, welche Gründe gab es dafür? *Bitte kreuzen Sie für jede der Aussagen das für Sie am meisten Zutreffende an. Wenn Sie eine Zweitmeinung eingeholt haben 🡪 Weiter mit Frage 26)*

| **Ich habe keine Zweitmeinung eingeholt, weil ich…** | Trifft  überhaupt  nicht zu | Trifft eher nicht zu | Trifft eher zu | Trifft  vollständig  zu |
| --- | --- | --- | --- | --- |
| …mir den Eingriff, unabhängig davon, was ein weiterer Arzt sagt, wünschte. | *○* | *○* | *○* | *○* |
| …den Eingriff als letzte Möglichkeit sah. | *○* | *○* | *○* | *○* |
| …vollstes Vertrauen in meinen Arzt hatte und die Entscheidung in seine Hände legte. | *○* | *○* | *○* | *○* |
| …Angst hatte, dass sich das Verhältnis zu meinem Arzt durch das Einholen einer Zweitmeinung verschlechtert. | *○* | *○* | *○* | *○* |
| …dachte, dass zu viele Meinungen nur zu Verunsicherung führen. | *○* | *○* | *○* | *○* |
| …genügend Informationen hatte und mich dann anhand dieser entschieden habe. | *○* | *○* | *○* | *○* |
| …fand, dass der Aufwand, den ich zur Einholung der Zweitmeinung erbringen musste, zu hoch war. | *○* | *○* | *○* | *○* |
| Andere Gründe gegen die Einholung einer Zweitmeinung: | | | | |

**Fragen zu der Zweitmeinungsrichtlinie**

*Laut einer neuen Richtlinie aus dem Jahr 2019 sollte Sie Ihr Arzt, der die Empfehlung zur operativen Entfernung/Teilentfernung der Gaumenmandeln Ihres Kindes gegeben hat, darüber informieren, dass Sie sich eine Zweitmeinung einholen können und Ihnen dafür verschiedene Informationen übermitteln. Unter anderem sollte er Sie auf die online verfügbaren Informationsangebote über geeignete Zweitmeiner (eine Liste mit Fachärzten, bei denen Sie eine Zweitmeinung einholen können) hinweisen.*

1. Wir würden gerne wissen, welche Informationen Sie von Ihrem Arzt bezüglich der Einholung einer Zweitmeinung erhalten haben. *Bitte kreuzen Sie für jede der Aussagen das für Sie am meisten Zutreffende an.*

| **Mein Arzt …** | Ja | Nein | Ich weiß  nicht |
| --- | --- | --- | --- |
| … hat mich über das Recht auf eine ärztliche Zweitmeinung aufgeklärt. | *○* | *○* | *○* |
| … hat mich darauf hingewiesen, dass die Zweitmeinung nicht dort eingeholt werden kann, wo der Eingriff durchgeführt werden soll (Sicherung der Unabhängigkeit). | *○* | *○* | *○* |
| … hat mich darauf hingewiesen, wo ich Informationen über geeignete Zweitmeiner finde. | *○* | *○* | *○* |
| … hat mich auf ein Patientenmerkblatt zum Zweitmeinungsverfahren aufmerksam gemacht. | *○* | *○* | *○* |
| … hat mir ein Patientenmerkblatt mitgegeben. | *○* | *○* | *○* |
| … hat mich auf eine Entscheidungshilfe zur Entfernung/Teilentfernung der Gaumenmandeln aufmerksam gemacht. | *○* | *○* | *○* |
| … hat mir deutlich gemacht, dass ich Kopien von Befundunterlagen für die Einholung einer Zweitmeinung mitnehmen kann. | *○* | *○* | *○* |

**Gesundheitsbezogene Daten und soziodemographische Daten**

*Im Folgenden stellen wir Ihnen Fragen zu Ihrer Gesundheit bzw. Ihrem Gesundheitsverhalten sowie einige soziodemographische Fragen. Die Angaben helfen, die Ergebnisse dieser Umfrage zu untersuchen bzw. auszuwerten. Wir möchten Sie hier nochmals darauf hinweisen, dass die Befragung anonym ist, d.h. dass keine Rückschlüsse auf Ihre Person und Ihr Kind gezogen werden können.*

1. Die folgenden Fragen beziehen sich darauf, wie Sie mit Gesundheitsinformationen umgehen. *Bitte kreuzen Sie für jede der Fragen das für Sie am meisten Zutreffende an.*

| **Wie einfach/ schwierig ist es, …** | Sehr schwierig | Ziemlich schwierig | Ziemlich einfach | Sehr einfach | Weiß nicht |
| --- | --- | --- | --- | --- | --- |
| … Informationen über Unterstützungsmöglich-keiten bei psychischen Problemen, wie Stress oder Depression, zu finden? | *○* | *○* | *○* | *○* | *○* |
| … Informationen über Verhaltensweisen zu finden, die gut für Ihr psychisches Wohlbefinden sind? | *○* | *○* | *○* | *○* | *○* |
| … herauszufinden, wo Sie professionelle Hilfe erhalten, wenn Sie krank sind? | *○* | *○* | *○* | *○* | *○* |
| … Informationen über Krankheitssymptome, die Sie betreffen, zu finden? | *○* | *○* | *○* | *○* | *○* |
| … Informationen in den Medien darüber, wie Sie Ihren Gesundheitszustand verbessern können, zu verstehen? | *○* | *○* | *○* | *○* | *○* |
| … Gesundheitsratschläge von Familien-mitgliedern oder Freunden zu verstehen? | *○* | *○* | *○* | *○* | *○* |
| … zu verstehen, was Ihr Arzt Ihnen sagt? | *○* | *○* | *○* | *○* | *○* |
| … zu verstehen, warum Sie Vorsorgeuntersuchungen brauchen? | *○* | *○* | *○* | *○* | *○* |
| … die Anweisungen Ihres Arztes oder Apothekers zur Einnahme der verschriebenen Medikamente zu verstehen? | *○* | *○* | *○* | *○* | *○* |
| … Gesundheitswarnungen vor Verhaltens-weisen wie Rauchen, wenig Bewegung oder übermäßiges Trinken zu verstehen? | *○* | *○* | *○* | *○* | *○* |
| … zu beurteilen, ob die Informationen über Gesundheitsrisiken in den Medien vertrauenswürdig sind? | *○* | *○* | *○* | *○* | *○* |
| … zu beurteilen, wann Sie eine zweite Meinung von einem anderen Arzt einholen sollten? | *○* | *○* | *○* | *○* | *○* |
| … zu beurteilen, welche Alltagsgewohnheiten mit Ihrer Gesundheit zusammenhängen? | *○* | *○* | *○* | *○* | *○* |
| … aufgrund von Informationen aus den Medien zu entscheiden, wie Sie sich vor Krankheiten schützen können? | *○* | *○* | *○* | *○* | *○* |
| … mit Hilfe der Informationen, die Ihnen der Arzt gibt, Entscheidungen bezüglich Ihrer Krankheit zu treffen? | *○* | *○* | *○* | *○* | *○* |
| … den Anweisungen Ihres Arztes oder Apothekers zu folgen? | *○* | *○* | *○* | *○* | *○* |

1. Die folgenden Aussagen beziehen sich darauf, wie umfangreich Sie von Ihrem Arzt informiert werden und an den Entscheidungen teilhaben möchten. *Bitte kreuzen Sie für jede der Aussagen das für Sie am meisten Zutreffende an.*

|  | Sehr dafür | Etwas dafür | Neutral | Etwas dagegen | Sehr dagegen |
| --- | --- | --- | --- | --- | --- |
| Wichtige medizinische Entscheidungen sollten von Ihrem Arzt/Ihrer Ärztin getroffen werden und nicht von Ihnen. | *○* | *○* | *○* | *○* | *○* |
| Sie sollten sich dem Rat Ihres Arztes/Ihrer Ärztin anschließen, auch wenn Sie anderer Meinung sind. | *○* | *○* | *○* | *○* | *○* |
| Während der Behandlung im Krankenhaus sollten Sie keine Entscheidungen über Ihre eigene Behandlung treffen. | *○* | *○* | *○* | *○* | *○* |
| Sie werden krank und Ihre Erkrankung verschlechtert sich. Möchten Sie, dass Ihr Arzt/Ihre Ärztin Ihre Behandlung in stärkerem Maße in die Hand nimmt? | *○* | *○* | *○* | *○* | *○* |
| Je mehr sich Ihre Erkrankung verschlechtert, umso mehr sollten Sie über Ihre Erkrankung aufgeklärt werden. | *○* | *○* | *○* | *○* | *○* |
| Sie sollten vollständig verstehen, was infolge der Krankheit in Ihrem Körper vor sich geht. | *○* | *○* | *○* | *○* | *○* |
| Auch bei schlechten Untersuchungs-ergebnissen, sollten Sie umfassend informiert werden. | *○* | *○* | *○* | *○* | *○* |
| Ihr Arzt/Ihre Ärztin sollte Ihnen den Zweck der Laboruntersuchungen erklären. | *○* | *○* | *○* | *○* | *○* |
| Es ist wichtig für Sie, alle Nebenwirkungen Ihrer Medikamente zu kennen. | *○* | *○* | *○* | *○* | *○* |
| Informationen über Ihre Krankheit sind für Sie genauso wichtig wie die Behandlung selbst. | *○* | *○* | *○* | *○* | *○* |
| Wenn es mehr als eine Möglichkeit der Behandlung gibt, sollten Sie über alle informiert werden. | *○* | *○* | *○* | *○* | *○* |

| 1. Hatten Sie selbst eine operative Entfernung/Teilentfernung der Gaumenmandeln?   *○* Ja  *○* Nein |
| --- |
| 1. Welches Geschlecht haben Sie?   *○* Männlich  *○* Weiblich  *○* Divers |
| 1. Welches Geschlecht hat Ihr Kind?   *○* Männlich  *○* Weiblich  *○* Divers |
| 1. Die Ergebnisse dieser Befragung werden auch für unterschiedliche Altersgruppen ausgewertet. Bitte nennen Sie dazu Monat und Jahr Ihrer Geburt.   Geburtsmonat Geburtsjahr  ☐☐ ☐☐☐☐ |
| 1. Bitte nennen Sie Monat und Jahr der Geburt Ihres Kindes.   Geburtsmonat Geburtsjahr  ☐☐ ☐☐☐☐ |
| 1. Welchen Familienstand hatten Sie zur Zeit der Operation Ihres Kindes?   *○* Verheiratet/In eingetragener Lebenspartnerschaft (gleichgeschlechtlich), zusammenlebend 🡪 *Weiter mit Frage 36)*  *○* Verheiratet/In eingetragener Lebenspartnerschaft (gleichgeschlechtlich), getrennt lebend  *○* Geschieden/Eingetragene Lebenspartnerschaft aufgehoben (gleichgeschlechtlich)  *○* Verwitwet/Eingetragene/r Lebenspartner/-in verstorben (gleichgeschlechtlich)  *○* Ledig |
| 1. Lebten Sie zur Zeit der Operation Ihres Kindes mit einer Person aus Ihrem Haushalt in einer Partnerschaft?   *○* Ja  *○* Nein |
| 1. Welchen höchsten allgemeinbildenden Schulabschluss Sie zur Zeit der Operation Ihres Kindes hatten?   *○* Schüler/-in, besuche eine allgemeinbildende Vollzeitschule  *○* Von der Schule abgegangen ohne Schulabschluss  *○* Hauptschulabschluss (Volksschulabschluss) oder gleichwertiger Abschluss  *○* Polytechnische Oberschule der DDR mit Abschluss der 8. oder 9. Klasse  *○* Realschulabschluss (Mittlere Reife) oder gleichwertiger Abschluss  *○* Polytechnische Oberschule der DDR mit Abschluss der 10. Klasse  *○* Fachhochschulreife  *○* Abitur/Allgemeine oder fachgebundene Hochschulreife  *○* Einen anderen Schulabschluss, und zwar: ___________________________________ |
| 1. Was war Ihr höchster beruflicher Ausbildungsstatus zur Zeit der Operation Ihres Kindes?   *○*Noch in beruflicher Ausbildung  *○*Ohne beruflichen Ausbildungsabschluss  *○* Abschluss einer beruflichen Ausbildung von mindestens einem Jahr  *○*Hochschulabschluss |
| 1. Für die Einordnung Ihres Wohnortes in eine Kleinstadt/ Mittelstadt/Großstadt würden wir gerne Ihre Postleitzahl zur Zeit der Operation Ihres Kindes wissen: ______________ |
| 1. Wie viele Personen lebten zur Zeit der Operation Ihres Kindes ständig in Ihrem Haushalt, Sie selbst eingeschlossen?   *○* Nur eine Person 🡪*Weiter mit Frage 41)*  *○* Mehrere Personen, und zwar: ___ __ |
| 1. Wie viele Personen waren zur Zeit der Operation Ihres Kindes in Ihrem Haushalt über 14 Jahre alt? ____ ____ |
| 1. Für die Auswertung nach Gruppen (z.B. niedriges Einkommen, mittleres Einkommen, hohes Einkommen) würden wir gerne wissen: Wie hoch war das durchschnittliche monatliche Nettoeinkommen Ihres Haushalts insgesamt zur Zeit der Operation Ihres Kindes?   *(Nehmen Sie die Summe aus Lohn/Gehalt, Einkommen aus selbstständiger Tätigkeit, Rente oder Pension, Einkünfte aus öffentlichen Beihilfen, Einkommen aus Vermietung und Verpachtung, Wohngeld, Kindergeld und sonstige Einkünfte und ziehen Sie dann Steuern und Sozialversicherungsbeiträge ab)*   | *○* 0 – 450 Euro  *○* 451 – 850 Euro  *○* 851 – 1000 Euro  *○* 1001 – 1250 Euro  *○* 1251 – 1500 Euro  *○* 1501 – 1750 Euro  *○* 1751 – 2000 Euro  *○* 2001 – 2250 Euro | *○* 2251 – 2500 Euro  *○* 2501 – 2750 Euro  *○* 2751 – 3000 Euro  *○* 3001 – 3250 Euro  *○* 3251 – 3500 Euro  *○* 3501 – 3750 Euro  *○* 3751 – 4000 Euro  *○* 4001 – 4500 Euro | *○* 4500 – 5000 Euro  *○* 5001 – 5500 Euro  *○* 5501 – 6000 Euro  *○* 6001 – 7500 Euro  *○* 7501 – 10.000 Euro  *○* 10.001 – 20.000 Euro  *○* Mehr als 20.000 Euro  *○* Keine Angabe | | --- | --- | --- | |

*Falls Sie noch Anmerkungen zu unserer Befragung haben oder uns etwas mitteilen möchten, haben Sie hier die Möglichkeit.*

|  |
| --- |

*Wir bedanken uns vielmals für Ihre Unterstützung!*

**Einleitung**

*Sie haben eine Schulterarthroskopie (Schulterspiegelung) durchführen lassen. Dafür haben Sie vorher von einer Ärztin oder einem Arzt oder auch von mehreren Ärztinnen oder Ärzten eine Empfehlung zur Schulterarthroskopie erhalten.*

*Wir wollen im Folgenden herausfinden, wie Sie die Entscheidung für diese Operation getroffen haben, also z.B. welche Beratungsangebote Sie in Anspruch genommen haben. Außerdem würden wir gerne erfahren, wie zufrieden Sie mit den Informationen bezüglich einer Schulterarthroskopie waren und ob Sie möglicherweise eine weitere Ärztin oder einen weiteren Arzt konsultiert haben.*

*Bitte beachten Sie, dass bei personenbezogenen Bezeichnungen aus Gründen der Lesbarkeit nur die männliche Form gewählt wurde. Nichtsdestotrotz beziehen sich die Angaben auf alle Geschlechter.*

**Allgemeines zu Ihrer Schulterarthroskopie**

1. Welche Gründe haben zur Empfehlung der Schulterarthroskopie geführt? *Mehrfachnennungen sind möglich.*

○ Schultersteife/Frozen-Shoulder

○ Schulter-Impingement-Syndrom

○ Risse an der Rotatoren-Manschette

○ Schäden an Gelenklippe der Schultergelenkpfanne („SLAP-Läsionen“)

○ Kalkschulter

○ Schleimbeutelentzündung

○ Arthrose im Schultergelenk

*○* Andere: _________ ___

*○* Ich weiß nicht

1. Wann wurde die Schulterarthroskopie durchgeführt?

Monat Jahr

☐☐ ☐☐☐☐

1. Wer hat die Empfehlung zu Ihrer Schulterarthroskopie als erstes ausgesprochen? *Bitte kreuzen Sie nur eine Antwort an.*

○ Ein Arzt in einer Arztpraxis

○ Ein Arzt im Krankenhaus (gemeint ist nicht das OP Aufklärungsgespräch)

*○* Andere: _________ ___

**Fragen zu dem Entscheidungsprozess und Informationen über die Schulterarthroskopie**

1. Inwiefern hat sich Ihr Gesundheitszustand nach der Schulterarthroskopie verändert? *Bitte kreuzen Sie das für Sie am meisten Zutreffende an.*

| Starke Verschlechterung | Leichte Verschlechterung | Keine Veränderung | Leichte Verbesserung | Starke Verbesserung |  |
| --- | --- | --- | --- | --- | --- |
| *○* | *○* | *○* | *○* | *○* |  |

1. Denken Sie bitte zurück an die Zeit, in der Sie die Entscheidung für die Schulterarthroskopie getroffen haben. Wie empfanden Sie die Entscheidung? *Bitte kreuzen Sie das für Sie am meisten Zutreffende an.*

| Sehr schwierig | Schwierig | Mittel | Leicht | Sehr leicht |  |
| --- | --- | --- | --- | --- | --- |
| ○ | ○ | ○ | ○ | ○ |  |

1. Wie dringlich haben Sie die Entscheidung empfunden? *Bitte kreuzen Sie das für Sie am meisten Zutreffende an.*

| Sehr dringlich | Dringlich | Mittel | Weniger dringlich | Gar nicht dringlich |  |
| --- | --- | --- | --- | --- | --- |
| ○ | ○ | ○ | ○ | ○ |  |

1. Denken Sie bitte zurück an das Gespräch mit Ihrem Arzt, der Ihnen erstmals eine Schulterarthroskopie empfohlen hat. *Bitte kreuzen Sie das für Sie am meisten Zutreffende an*.

| **Wie fühlten Sie sich aufgeklärt hinsichtlich…** | Sehr schlecht | Schlecht | Mittel | Gut | Sehr gut |
| --- | --- | --- | --- | --- | --- |
| … Ihrer Erkrankung? | ○ | ○ | ○ | ○ | ○ |
| … der Behandlungsalternativen? | ○ | ○ | ○ | ○ | ○ |
| … der Vorteile der Schulterarthroskopie ? | ○ | ○ | ○ | ○ | ○ |
| … der Risiken und Nebenwirkungen der Schulterarthroskopie? | ○ | ○ | ○ | ○ | ○ |

1. Denken Sie bitte zurück an das Gespräch mit Ihrem Arzt, der Ihnen erstmals eine Schulterarthroskopie empfohlen hat. *Bitte kreuzen Sie das für Sie am meisten Zutreffende an.*

|  | Sehr schlecht | Schlecht | Mittel | Gut | Sehr gut |
| --- | --- | --- | --- | --- | --- |
| Wie nachvollziehbar war die Empfehlung zur Schulterarthroskopie für Sie? | ○ | ○ | ○ | ○ | ○ |
| Wie verständlich waren die Informationen, die Sie erhielten? | ○ | ○ | ○ | ○ | ○ |
| Wie fühlten Sie sich insgesamt aufgeklärt? | ○ | ○ | ○ | ○ | ○ |

1. Hätten Sie sich vor der Schulterarthroskopie zusätzliche Informationen gewünscht? *Mehrfachnennungen sind möglich.*

○ Ja, ich wünschte mir mehr Informationen über…

○ … die Erkrankung

○ … die Behandlungsmöglichkeiten

○ … die Vorteile einer Schulterarthroskopie

○ … die Nachteile einer Schulterarthroskopie

○ Andere: _________ ___

○ Nein, ich wünschte mir keine zusätzlichen Informationen.

1. Haben Sie sich vor der Schulterarthroskopie woanders Informationen zu der Diagnose oder Behandlung eingeholt? *Mehrfachnennungen sind möglich.*

○ Ja, ich habe…

○ … im Internet recherchiert

○ … mit Angehörigen/Freunden gesprochen

○ … bei der Krankenkasse nachgefragt

○ … medizinisches Fachpersonal (z.B. Arzt, Krankengymnast) befragt

○ Anderes: _________ __

○ Nein 🡪 *Weiter mit Frage 16)*

1. FallsSie sich weitere Informationen eingeholt haben, welche Quelle war für Sie die wichtigste?

|  |
| --- |

1. Denken Sie bitte nun nur an die Quelle, die für Sie am wichtigsten war, also über das Gespräch mit Ihrem Arzt, der Ihnen erstmals eine Schulterarthroskopie empfohlen hat, hinaus. *Bitte kreuzen Sie das für Sie am meisten Zutreffende an.*

|  | Sehr schwer | Schwer | Mittel | Leicht | Sehr leicht |
| --- | --- | --- | --- | --- | --- |
| Wie war es für Sie zusätzliche Informationen aus der anderen Quelle zu erhalten? | ○ | ○ | ○ | ○ | ○ |
| Wie verständlich waren die zusätzlichen Informationen aus der anderen Quelle? | ○ | ○ | ○ | ○ | ○ |

1. Wie vertrauenswürdig fanden Sie die zusätzlichen Informationen aus der anderen Quelle? Berücksichtigen Sie bitte nur die Quelle, die für Sie am wichtigsten war. *Bitte kreuzen Sie das für Sie am meisten Zutreffende an.*

| Nicht vertrauenswürdig | Weniger vertrauenswürdig | Mittel | Eher vertrauenswürdig | Sehr vertrauenswürdig |  |
| --- | --- | --- | --- | --- | --- |
| ○ | ○ | ○ | ○ | ○ |  |

1. Inwiefern haben die zusätzlichen Informationen aus der anderen Quelle zu Ihrer Entscheidung beigetragen? Berücksichtigen Sie bitte nur die Quelle, die für Sie am wichtigsten war. *Bitte kreuzen Sie das für Sie am meisten Zutreffende an.*

| Gar nicht | Wenig | Mittel | Etwas | Sehr stark |  |
| --- | --- | --- | --- | --- | --- |
| ○ | ○ | ○ | ○ | ○ |  |

1. Inwiefern haben Sie die zusätzlichen Informationen aus der anderen Quelle verunsichert?Berücksichtigen Sie bitte nur die Quelle, die für Sie am wichtigsten war. *Bitte kreuzen Sie das für Sie am meisten Zutreffende an.*

| Gar nicht | Wenig | Mittel | Etwas | Sehr stark |  |
| --- | --- | --- | --- | --- | --- |
| ○ | ○ | ○ | ○ | ○ |  |

1. Bitte denken Sie noch einmal intensiv über den gesamten Entscheidungsprozess für die Schulterarthroskopie nach. Wie haben Sie den Entscheidungsprozess empfunden? *Bitte kreuzen Sie für jede der Aussagen das für Sie am meisten Zutreffende an.*

|  | Trifft über-haupt nicht zu | Trifft eher nicht zu | Trifft teil-weise zu | Trifft eher zu | Trifft voll-ständig zu |
| --- | --- | --- | --- | --- | --- |
| Ich wusste, welche Wahlmöglichkeiten ich hatte. | ○ | ○ | ○ | ○ | ○ |
| Ich kannte die Vorteile jeder Wahlmöglichkeit. | ○ | ○ | ○ | ○ | ○ |
| Ich kannte die Risiken und Nebenwirkungen jeder Wahlmöglichkeit. | ○ | ○ | ○ | ○ | ○ |
| Ich war mir darüber im Klaren, welche Vorteile für mich am wichtigsten waren. | ○ | ○ | ○ | ○ | ○ |
| Ich war mir darüber im Klaren, welche Risiken und Nebenwirkungen für mich am wichtigsten waren. | ○ | ○ | ○ | ○ | ○ |
| Ich war mir darüber im Klaren, was mir wichtiger war (Vorteile oder Risiken und Nebenwirkungen). | ○ | ○ | ○ | ○ | ○ |
| Ich hatte genug Unterstützung von Anderen, um diese Entscheidung zu treffen. | ○ | ○ | ○ | ○ | ○ |
| Ich traf diese Entscheidung ohne Druck von Anderen. | ○ | ○ | ○ | ○ | ○ |
| Ich hatte genügend Beratung, um diese Entscheidung zu treffen. | ○ | ○ | ○ | ○ | ○ |
| Ich war mir darüber im Klaren, was für mich die beste Wahl war. | ○ | ○ | ○ | ○ | ○ |
| Ich war mir sicher, wofür ich mich entscheiden sollte. | ○ | ○ | ○ | ○ | ○ |
| Diese Entscheidung fiel mir leicht. | ○ | ○ | ○ | ○ | ○ |
| Ich hatte das Gefühl eine informierte Entscheidung getroffen zu haben. | ○ | ○ | ○ | ○ | ○ |
| Meine Entscheidung zeigte, was mir wichtig ist. | ○ | ○ | ○ | ○ | ○ |
| Ich war mit meiner Entscheidung zufrieden. | ○ | ○ | ○ | ○ | ○ |

1. Wir möchten gerne erfahren, wie Sie nun nachträglich über Ihre Entscheidung für die Schulterarthroskopie denken. *Bitte kreuzen Sie für jede der Aussagen das für Sie am meisten Zutreffende an.*

|  | Ich stimme überein | Ich stimme eher überein | Weder noch | Ich stimme eher nicht überein | Ich stimme nicht überein |
| --- | --- | --- | --- | --- | --- |
| Es war die richtige Entscheidung. | ○ | ○ | ○ | ○ | ○ |
| Ich bereue die Wahl, die ich getroffen habe. | ○ | ○ | ○ | ○ | ○ |
| Ich würde die gleiche Wahl wieder treffen, wenn ich die Entscheidung erneut treffen müsste. | ○ | ○ | ○ | ○ | ○ |
| Die Wahl hat mir viel Leid bereitet. | ○ | ○ | ○ | ○ | ○ |
| Die Entscheidung war vernünftig. | ○ | ○ | ○ | ○ | ○ |

**Fragen zu einer Zweitmeinung**

*Unter einer Zweitmeinung verstehen wir, dass Sie sich mit einer konkreten medizinischen Fragestellung bei einem weiteren Arzt vorstellen, beispielsweise um eine Diagnose oder einen Behandlungsvorschlag Ihres Arztes abzusichern oder nach Alternativen zu suchen. In Ihrem Fall bedeutet dies, dass Sie sich nach der Empfehlung für die Schulterarthroskopie bei einem anderen Arzt eine Zweitmeinung eingeholt haben, bevor Sie sich der Schulterarthroskopie unterzogen haben.*

1. Haben Sie vor der Schulterarthroskopie eine Zweitmeinung in Anspruch genommen?

○ Ja

○ Nein 🡪*Weiter mit Frage 24)*

1. Falls Sie eine Zweitmeinung in Anspruch genommen haben, bei wem haben Sie die Zweitmeinung eingeholt? *Bitte kreuzen Sie nur eine Antwort an.*

○ Arzt in einer Arztpraxis

○ Arzt im Krankenhaus (gemeint ist nicht das OP Aufklärungsgespräch)

○ Krankenkasse

○ Andere: _ _______________

1. Hat der Arzt, bei dem Sie eine Zweitmeinung eingeholt haben, auch die Schulterarthroskopie durchgeführt? Bitte beziehen Sie sich nicht auf das OP-Aufklärungsgespräch, sondern nur auf den Fall, dass Sie sich bei diesem Arzt aktiv um eine Zweitmeinung bemüht haben.

○ Ja

○ Nein

1. Wurde die Erstmeinung durch die Zweitmeinung bestätigt?

○ Ja

○ Teilweise

○ Nein

1. Inwiefern hat die Zweitmeinung zu Ihrer Entscheidung beigetragen?

○ Ich war mir nach Einholung der Zweitmeinung sicher, welche Behandlung ich wählen soll.

○ Ich war mir nach Einholung der Zweitmeinung trotzdem nicht sicher, welche Behandlung ich wählen

soll.

1. Haben Sie sich im Anschluss noch eine dritte Meinung eingeholt?

○ Ja

○ Nein

1. Neben einem persönlichen Arzt-Patienten-Kontakt gibt es auch andere Optionen, eine Zweitmeinung einzuholen. Beispielsweise besteht die Möglichkeit, die Befundunterlagen dem Zweitmeiner zuzusenden und eine telefonische oder schriftliche Stellungnahme zu erhalten. Wir würden im Folgenden gerne wissen, welche Optionen zur Einholung einer Zweitmeinung bezüglich der Schulterarthroskopie für Sie in Frage gekommen sind. *Bitte kreuzen Sie für jede Möglichkeit eine Antwort an.*

|  | Kam nicht in Frage | Kam eher nicht in Frage | Neutral | Kam eher in Frage | Kam in Frage |
| --- | --- | --- | --- | --- | --- |
| Persönliche Beratung vor Ort | ○ | ○ | ○ | ○ | ○ |
| Telefonische Beratung | ○ | ○ | ○ | ○ | ○ |
| Schriftliche Beratung per E-Mail/Post | ○ | ○ | ○ | ○ | ○ |

1. Wenn Sie sich **keine** Zweitmeinung eingeholt haben, welche Gründe gab es dafür? *Bitte kreuzen Sie für jede der Aussagen das für Sie am meisten Zutreffende an. Wenn Sie eine Zweitmeinung eingeholt haben 🡪 Weiter mit Frage 26)*

| **Ich habe keine Zweitmeinung eingeholt, weil ich…** | Trifft  überhaupt  nicht zu | Trifft eher nicht zu | Trifft eher zu | Trifft  vollständig  zu |
| --- | --- | --- | --- | --- |
| … mir die Schulterarthroskopie, unabhängig davon, was ein weiterer Arzt sagt, wünschte. | ○ | ○ | ○ | ○ |
| … die Schulterarthroskopie als letzte Möglichkeit sah. | ○ | ○ | ○ | ○ |
| … vollstes Vertrauen in meinen Arzt hatte und die Entscheidung in seine Hände legte. | ○ | ○ | ○ | ○ |
| … Angst hatte, dass sich das Verhältnis zu meinem Arzt durch das Einholen einer Zweitmeinung verschlechtert. | ○ | ○ | ○ | ○ |
| … dachte, dass zu viele Meinungen nur zu Verunsicherung führen. | ○ | ○ | ○ | ○ |
| … genügend Informationen hatte und mich dann anhand dieser entschieden habe. | ○ | ○ | ○ | ○ |
| … fand, dass der Aufwand, den ich zur Einholung der Zweitmeinung erbringen musste, zu hoch war. | ○ | ○ | ○ | ○ |
| Andere Gründe gegen die Einholung einer Zweitmeinung: | | | | |

**Gesundheitsbezogene Daten und soziodemographische Daten**

*Im Folgenden stellen wir Ihnen Fragen zu Ihrer Gesundheit bzw. Ihrem Gesundheitsverhalten sowie einige soziodemographische Fragen. Die Angaben helfen, die Ergebnisse dieser Umfrage zu untersuchen bzw. auszuwerten. Wir möchten Sie hier nochmals darauf hinweisen, dass die Befragung anonym ist, d.h. dass keine Rückschlüsse auf Ihre Person gezogen werden können.*

1. Die folgenden Fragen beziehen sich darauf, wie Sie mit Gesundheitsinformationen umgehen. *Bitte kreuzen Sie für jede der Fragen das für Sie am meisten Zutreffende an.*

| **Wie einfach/ schwierig ist es, …** | Sehr schwierig | Ziemlich schwierig | Ziemlich einfach | Sehr einfach | Weiß nicht |
| --- | --- | --- | --- | --- | --- |
| … Informationen über Unterstützungsmöglich-keiten bei psychischen Problemen, wie Stress oder Depression, zu finden? | *○* | *○* | *○* | *○* | *○* |
| … Informationen über Verhaltensweisen zu finden, die gut für Ihr psychisches Wohlbefinden sind? | *○* | *○* | *○* | *○* | *○* |
| … herauszufinden, wo Sie professionelle Hilfe erhalten, wenn Sie krank sind? | *○* | *○* | *○* | *○* | *○* |
| … Informationen über Krankheitssymptome, die Sie betreffen, zu finden? | *○* | *○* | *○* | *○* | *○* |
| … Informationen in den Medien darüber, wie Sie Ihren Gesundheitszustand verbessern können, zu verstehen? | *○* | *○* | *○* | *○* | *○* |
| … Gesundheitsratschläge von Familien-mitgliedern oder Freunden zu verstehen? | *○* | *○* | *○* | *○* | *○* |
| … zu verstehen, was Ihr Arzt Ihnen sagt? | *○* | *○* | *○* | *○* | *○* |
| … zu verstehen, warum Sie Vorsorgeuntersuchungen brauchen? | *○* | *○* | *○* | *○* | *○* |
| … die Anweisungen Ihres Arztes oder Apothekers zur Einnahme der verschriebenen Medikamente zu verstehen? | *○* | *○* | *○* | *○* | *○* |
| … Gesundheitswarnungen vor Verhaltens-weisen wie Rauchen, wenig Bewegung oder übermäßiges Trinken zu verstehen? | *○* | *○* | *○* | *○* | *○* |
| … zu beurteilen, ob die Informationen über Gesundheitsrisiken in den Medien vertrauenswürdig sind? | *○* | *○* | *○* | *○* | *○* |
| … zu beurteilen, wann Sie eine zweite Meinung von einem anderen Arzt einholen sollten? | *○* | *○* | *○* | *○* | *○* |
| … zu beurteilen, welche Alltagsgewohnheiten mit Ihrer Gesundheit zusammenhängen? | *○* | *○* | *○* | *○* | *○* |
| … aufgrund von Informationen aus den Medien zu entscheiden, wie Sie sich vor Krankheiten schützen können? | *○* | *○* | *○* | *○* | *○* |
| … mit Hilfe der Informationen, die Ihnen der Arzt gibt, Entscheidungen bezüglich Ihrer Krankheit zu treffen? | *○* | *○* | *○* | *○* | *○* |
| … den Anweisungen Ihres Arztes oder Apothekers zu folgen? | *○* | *○* | *○* | *○* | *○* |

1. Die folgenden Aussagen beziehen sich darauf, wie umfangreich Sie von Ihrem Arzt informiert werden und an den Entscheidungen teilhaben möchten. *Bitte kreuzen Sie für jede der Aussagen das für Sie am meisten Zutreffende an.*

|  | Sehr dafür | Etwas dafür | Neutral | Etwas dagegen | Sehr dagegen |
| --- | --- | --- | --- | --- | --- |
| Wichtige medizinische Entscheidungen sollten von Ihrem Arzt/Ihrer Ärztin getroffen werden und nicht von Ihnen. | ○ | ○ | ○ | ○ | ○ |
| Sie sollten sich dem Rat Ihres Arztes/Ihrer Ärztin anschließen, auch wenn Sie anderer Meinung sind. | ○ | ○ | ○ | ○ | ○ |
| Während der Behandlung im Krankenhaus sollten Sie keine Entscheidungen über Ihre eigene Behandlung treffen. | ○ | ○ | ○ | ○ | ○ |
| Sie werden krank und Ihre Erkrankung verschlechtert sich. Möchten Sie, dass Ihr Arzt/Ihre Ärztin Ihre Behandlung in stärkerem Maße in die Hand nimmt? | ○ | ○ | ○ | ○ | ○ |
| Je mehr sich Ihre Erkrankung verschlechtert, umso mehr sollten Sie über Ihre Erkrankung aufgeklärt werden. | ○ | ○ | ○ | ○ | ○ |
| Sie sollten vollständig verstehen, was infolge der Krankheit in Ihrem Körper vor sich geht. | ○ | ○ | ○ | ○ | ○ |
| Auch bei schlechten Untersuchungs-ergebnissen, sollten Sie umfassend informiert werden. | ○ | ○ | ○ | ○ | ○ |
| Ihr Arzt/Ihre Ärztin sollte Ihnen den Zweck der Laboruntersuchungen erklären. | ○ | ○ | ○ | ○ | ○ |
| Es ist wichtig für Sie, alle Nebenwirkungen Ihrer Medikamente zu kennen. | ○ | ○ | ○ | ○ | ○ |
| Informationen über Ihre Krankheit sind für Sie genauso wichtig wie die Behandlung selbst. | ○ | ○ | ○ | ○ | ○ |
| Wenn es mehr als eine Möglichkeit der Behandlung gibt, sollten Sie über alle informiert werden. | ○ | ○ | ○ | ○ | ○ |

| 1. Welches Geschlecht haben Sie?   ○ Männlich  ○ Weiblich  ○ Divers |
| --- |
| 1. Die Ergebnisse dieser Befragung werden auch für unterschiedliche Altersgruppen ausgewertet. Bitte nennen Sie dazu Monat und Jahr Ihrer Geburt.   Geburtsmonat Geburtsjahr  ☐☐ ☐☐☐☐ |
| 1. Welchen Familienstand hatten Sie zur Zeit Ihrer Operation?   ○ Verheiratet/In eingetragener Lebenspartnerschaft (gleichgeschlechtlich), zusammenlebend 🡪 *Weiter mit Frage 32)*  ○ Verheiratet/In eingetragener Lebenspartnerschaft (gleichgeschlechtlich), getrennt lebend  ○Geschieden/Eingetragene Lebenspartnerschaft aufgehoben (gleichgeschlechtlich)  ○Verwitwet/Eingetragene/r Lebenspartner/-in verstorben (gleichgeschlechtlich)  ○Ledig |
| 1. Lebten Sie zur Zeit Ihrer Operation mit einer Person aus Ihrem Haushalt in einer Partnerschaft?   ○Ja  ○Nein |
| 1. Welchen höchsten allgemeinbildenden Schulabschluss Sie zur Zeit Ihrer Operation?   ○ Schüler/-in, besuche eine allgemeinbildende Vollzeitschule  ○ Von der Schule abgegangen ohne Schulabschluss  ○Hauptschulabschluss (Volksschulabschluss) oder gleichwertiger Abschluss  ○Polytechnische Oberschule der DDR mit Abschluss der 8. oder 9. Klasse  ○Realschulabschluss (Mittlere Reife) oder gleichwertiger Abschluss  ○Polytechnische Oberschule der DDR mit Abschluss der 10. Klasse  ○ Fachhochschulreife  ○ Abitur/Allgemeine oder fachgebundene Hochschulreife  ○ Einen anderen Schulabschluss, und zwar: ___________________________________ |
| 1. Was war Ihr höchster beruflicher Ausbildungsstatus zur Zeit Ihrer Operation?   ○Noch in beruflicher Ausbildung  ○Ohne beruflichen Ausbildungsabschluss  ○ Abschluss einer beruflichen Ausbildung von mindestens einem Jahr  ○Hochschulabschluss |
| 1. Für die Einordnung Ihres Wohnortes in eine Kleinstadt/ Mittelstadt/Großstadt würden wir gerne Ihre Postleitzahl zur Zeit Ihrer Operation wissen: ______________ |
| 1. Wie viele Personen lebten zur Zeit Ihrer Operation ständig in Ihrem Haushalt, Sie selbst eingeschlossen?   ○ Nur eine Person 🡪*Weiter mit Frage 37)*  ○ Mehrere Personen, und zwar: _ _____ |
| 1. Wie viele Personen waren zur Zeit Ihrer Operation in Ihrem Haushalt über 14 Jahre alt? ___ _____ |
| 1. Für die Auswertung nach Gruppen (z.B. niedriges Einkommen, mittleres Einkommen, hohes Einkommen) würden wir gerne wissen: Wie hoch war das durchschnittliche monatliche Nettoeinkommen Ihres Haushalts insgesamt zur Zeit Ihrer Operation?   *(Nehmen Sie die Summe aus Lohn/Gehalt, Einkommen aus selbstständiger Tätigkeit, Rente oder Pension, Einkünfte aus öffentlichen Beihilfen, Einkommen aus Vermietung und Verpachtung, Wohngeld, Kindergeld und sonstige Einkünfte und ziehen Sie dann Steuern und Sozialversicherungsbeiträge ab)*   | ○ 0 – 450 Euro  ○ 451 – 850 Euro  ○ 851 – 1000 Euro  ○ 1001 – 1250 Euro  ○ 1251 – 1500 Euro  ○ 1501 – 1750 Euro  ○ 1751 – 2000 Euro  ○ 2001 – 2250 Euro | ○ 2251 – 2500 Euro  ○ 2501 – 2750 Euro  ○ 2751 – 3000 Euro  ○ 3001 – 3250 Euro  ○ 3251 – 3500 Euro  ○ 3501 – 3750 Euro  ○ 3751 – 4000 Euro  ○ 4001 – 4500 Euro | ○ 4500 – 5000 Euro  ○ 5001 – 5500 Euro  ○ 5501 – 6000 Euro  ○ 6001 – 7500 Euro  ○ 7501 – 10.000 Euro  ○ 10.001 – 20.000 Euro  ○ Mehr als 20.000 Euro  ○ Keine Angabe | | --- | --- | --- | |

*Falls Sie noch Anmerkungen zu unserer Befragung haben oder uns etwas mitteilen möchten, haben Sie hier die Möglichkeit.*

|  |
| --- |

*Wir bedanken uns vielmals für Ihre Unterstützung!*
